# Supplementary material
Source: publisher figshare collection journal article supplement (https://frontiersin.figshare.com/ndownloader/files/15962627)
Supplement: Supplementary file [file 15962627]

**Table S1.** Primers used in this study.

| Primer Name       | Sequence                                                 | Purpose                                                           |
|-------------------|----------------------------------------------------------|-------------------------------------------------------------------|
| TamRNA1-1 F       | GCGGCTACAAAGTTGATGATGAC                                  | qRT-PCR (wheat target mRNA Traes_2AS_EC975D5AB)                   |
| TamRNA1-1 R       | TCTCCGGACGACCACAATATTG                                   | qRT-PCR (wheat target mRNA Traes_2AS_EC975D5AB)                   |
| TamRNA1-2 Fnew    | TTCTGTGTGCCTGGATTGTATGTC                                 | qRT-PCR (wheat target mRNA Traes_2BS_E5732CD2C)                   |
| TamRNA1-2 Rnew    | GAAC TTGTATGATGTGTTGAAAGTGGCG                            | qRT-PCR (wheat target mRNA Traes_2BS_E5732CD2C)                   |
| TamRNA1-3 Fnew    | TGGAGCCCGCAGCAAGCACTCGG                                  | qRT-PCR (wheat target mRNA Traes_2DS_9B86CE58D)                   |
| TamRNA1-3 Rnew    | GCTTGTAAATGCAGGGCACAAACG                                 | qRT-PCR (wheat target mRNA Traes_2DS_9B86CE58D)                   |
| TamRNA 2Fnew      | CCGTAACATTCAC TGGGTATAAAATC                              | qRT-PCR (wheat target mRNA Traes_4BS_5E12F0B27)                   |
| TamRNA 2 Rnew     | AAATATACTCTAGATGCACCAAGGC                                | qRT-PCR (wheat target mRNA Traes_4BS_5E12F0B27)                   |
| TamRNA3-1 F       | CCTTCCTCTCGGTGGGTGTTG                                    | qRT-PCR (wheat target mRNA Traes_4AS_92067319F)                   |
| TamRNA 3-1 R      | CCCATCTTTGCAGCGCCTGCT                                    | qRT-PCR (wheat target mRNA Traes_4AS_92067319F)                   |
| TamRNA 3-2 Fnew   | TGAACAGAACTGTATCTGCTGTAAAG                               | qRT-PCR (wheat target mRNA Traes_4BL_2136196AE)                   |
| TamRNA 3-2 R      | ATGCGGCGCGCGGTCATGG                                      | qRT-PCR (wheat target mRNA Traes_4BL_2136196AE)                   |
| TamRNA4-1 Fnew    | TCAGTCGCGTACCTTCTTGTC                                    | qRT-PCR (wheat target mRNA Traes_5BS_409B24307)                   |
| TamRNA4-1 Rnew    | CGAAGTGTCTGACAAAGCCG                                     | qRT-PCR (wheat target mRNA Traes_5BS_409B24307)                   |
| TamRNA4-2 F       | CATTTAGGCCCAAGAGAATAATGC                                 | qRT-PCR (wheat target mRNA Traes_5BS_2C2072466)                   |
| TamRNA4-2R        | GACAGGAACAGGTA CTCCCATG                                  | qRT-PCR (wheat target mRNA Traes_5BS_2C2072466)                   |
| TaCDC48 newF      | GTCCCTCTGGCTGTGGTAAAAC                                   | wheat reference gene for plant tissue qPCR                        |
| TaCDC48 newR      | AGCAGCTCAGGTCCCTTGATAC                                   | wheat reference gene for plant tissue qPCR                        |
| ZtB-tubulin F     | CCTACTTCGTCCGAGTGGATT                                    | <i>Z. tritici</i> reference gene for fungal tissue stem-loop qPCR |
| ZtB-tubulin R     | TACTCGGACACAAGATCGTT                                     | <i>Z. tritici</i> reference gene for fungal tissue stem-loop qPCR |
| universal R       | GTGCAGGTCGAGGT                                           | stem-loop qRT-PCR (universal reverse primer for all sRNA targets) |
| Zt-sRNA1 F        | GCGATCTTGGGGGAATCCGTAG                                   | stem-loop qRT-PCR                                                 |
| Zt-sRNA1 SLRT     | GTGCTATCCAGTGCAGGGTCCGAGGTATTCGCACTGGATACGACACAACA       | stem-loop cDNA synthesis                                          |
| Zt-sRNA2 F        | TGGACTGCACTGGTTGCTCG                                     | stem-loop qRT-PCR                                                 |
| Zt-sRNA2 SLRT     | GTGCTATCCAGTGCAGGGTCCGAGGTATTCGCACTGGATACGACAGCGTT       | stem-loop cDNA synthesis                                          |
| Zt-sRNA3 F        | GGCAGTAACCATCTTTCGGGT                                    | stem-loop qRT-PCR                                                 |
| Zt-sRNA3 SLRT     | GTGCTATCCAGTGCAGGGTCCGAGGTATTCGCACTGGATACGACAGTCAG       | stem-loop cDNA synthesis                                          |
| Zt-sRNA4 F        | GTGAAC TGGAGATCGCGAAAG                                   | stem-loop qRT-PCR                                                 |
| Zt-sRNA4 SLRT     | GTGCTATCCAGTGCAGGGTCCGAGGTATTCGCACTGGATACGACGAACCT       | stem-loop cDNA synthesis                                          |
| ZtDCL-1           | GGGCCCCGGCGCCGAATTCGAGCTGACAAC TATCTGATCTATTGCG          | Gibson cloning of the KO construct into vector pCHYG              |
| ZtDCL-2           | TCAGTTATCGAATATTGTGTTTCGACGACATC                         | Gibson cloning of the KO construct into vector pCHYG              |
| ZtDCL-3           | GTGAAACACAATATTCGATAACTGATATTGAAGG                       | Gibson cloning of the KO construct into vector pCHYG              |
| ZtDCL-4           | CATCCAACCAACCCTCGAGGTGCGACGGTATC                         | Gibson cloning of the KO construct into vector pCHYG              |
| ZtDCL-5           | CGTCGACCTCGAGGGGTGGTTGGATGGTGATTG                        | Gibson cloning of the KO construct into vector pCHYG              |
| ZtDCL-6           | CACGTGGTGGTGGTGGTGGCTAGCGTTAACACGGCCATTCGTTACAGA         | Gibson cloning of the KO construct into vector pCHYG              |
| ZtAGO2-1          | GGGCCCCGGCGGCCGAATTCGAGCTGCCTTGGACTCGGACCGG              | Gibson cloning of the KO construct into vector pCHYG              |
| ZtAGO2-2          | TCAGTTATCGAATGACAGTGC GGTTGGTGGG                         | Gibson cloning of the KO construct into vector pCHYG              |
| ZtAGO2-3          | CAACCGCACTGTCTATTGATAACTGATATTGAAGG                      | Gibson cloning of the KO construct into vector pCHYG              |
| ZtAGO2-4          | GCTGAAGTGACTTCTCGAGGTGCGACGGTATC                         | Gibson cloning of the KO construct into vector pCHYG              |
| ZtAGO2-5          | CGTCGACCTCGAGAAGTCACTTCAGCTTCTTTTC                       | Gibson cloning of the KO construct into vector pCHYG              |
| ZtAGO2-6          | CACGTGGTGGTGGTGGTGGCTAGCGTTAACAGGAGAGAGGGATGATACC        | Gibson cloning of the KO construct into vector pCHYG              |
| ZtAGO1-1          | GGGCCCCGGCGGCCGAATTCGAGCTCTCGAGCCTCCACCACTAC             | Gibson cloning of the KO construct into vector pCHYG              |
| ZtAGO1-2          | TCAGTTATCGAATGAAGTTGAGGTTGGGTAACG                        | Gibson cloning of the KO construct into vector pCHYG              |
| ZtAGO1-3          | CAACCTCAACTTCATTGATAACTGATATTGAAGG                       | Gibson cloning of the KO construct into vector pCHYG              |
| ZtAGO1-4          | TCTTCGAGCTCTCCTCGAGGTGCGACGGTATC                         | Gibson cloning of the KO construct into vector pCHYG              |
| ZtAGO1-5          | CGTCGACCTCGAGGAGAGCTCGAAGAGAAATC                         | Gibson cloning of the KO construct into vector pCHYG              |
| ZtAGO1-6          | CACGTGGTGGTGGTGGTGGTGGCTAGCGTTAACACTTACCTGTACGCCTATTTCAG | Gibson cloning of the KO construct into vector pCHYG              |
| ztTUBalpha_F2     | aaggaagtttaaCACCTACCGCAGCCTTTTCCAC                       | BSMV-HIGS                                                         |
| ztTUBalpha_R2     | aaccaccaccacgGTGCTGGGTACACGCAGAACTCA                     | BSMV-HIGS                                                         |
| ztTUBbeta_F1      | aaggaagtttaaCACCCAGCAAATCTTCGACCCTA                      | BSMV-HIGS                                                         |
| ztTUBbeta_R1      | aaccaccaccacgTCTGAACATGGCGGAGAACTGGTC                    | BSMV-HIGS                                                         |
| ztCYP51_F1        | aaggaagtttaaCCGTTTTGGACTCTCGTCTCTT                       | BSMV-HIGS                                                         |
| ztCYP51_R1        | aaccaccaccacgTCACTCCTACGTGACCTTGATCG                     | BSMV-HIGS                                                         |
| ztALG2_F1         | aaggaagtttaaCCTCGTGTACTTGCTGTTCAAC                       | BSMV-HIGS                                                         |
| ztALG2_R1         | aaccaccaccacgTATTGCGGATCCTCTGTACTA                       | BSMV-HIGS                                                         |
| ztTUBalpha_T7P_F2 | tcctaatacgactcactataggagCACCTACCGCAGCCTTTTCCAC           | in vitro RNAi                                                     |
| ztTUBalpha_T7P_R2 | tcctaatacgactcactataggagGTGCTGGGTACACGCAGAACTCA          | in vitro RNAi                                                     |
| ztTUBbeta_T7P_F1  | tcctaatacgactcactataggagCACCCAGCAAATCTTCGACCCTA          | in vitro RNAi                                                     |
| ztTUBbeta_T7P_R1  | tcctaatacgactcactataggagCTGAACATGGCGGAGAACTGGTC          | in vitro RNAi                                                     |
| ztCYP51_T7P_F1    | tcctaatacgactcactataggagCCGTTTTGGACTCTCGTCTCTT           | in vitro RNAi                                                     |
| ztCYP51_T7P_R1    | tcctaatacgactcactataggagCAGTCCTACGTGACCTTGATCG           | in vitro RNAi                                                     |
| GFP_T7P_F1        | tcctaatacgactcactataggagGCACAAATTTTCTGTCACTGGA           | in vitro RNAi                                                     |
| GFP_T7P_R1        | tcctaatacgactcactataggagGTCGAGAATGTTTCCATCTTC            | in vitro RNAi                                                     |

**Table S2.** Expression levels of the key predicted RNAi machinery components in *Zymoseptoria tritici* isolate IPO323.

| Gene              | Ensembl Fungi gene code | Locus             | CDB‡ | PDB | Mean FPKM values† |       |       |        |        |
|-------------------|-------------------------|-------------------|------|-----|-------------------|-------|-------|--------|--------|
|                   |                         |                   |      |     | 1 dpi             | 4 dpi | 9 dpi | 14 dpi | 21 dpi |
| <i>ZtDCL1</i>     | Mycgr3G47983            | 9:1660746-1665410 | 1.3  | 1.7 | 1.0               | 0.7   | 1.1   | 1.3    | 2.2    |
| <i>ZtAGO1</i>     | Mycgr3G38035            | 3:2630539-2633932 | 8.9  | 3.0 | 14.1              | 5.4   | 18.8  | 11.7   | 18.1   |
| <i>ZtAGO2</i>     | Mycgr3G10621            | 11:940972-943399  | 4.0  | 2.7 | 4.8               | 5.1   | 3.7   | 2.6    | 3.4    |
| <i>pseudoAGO3</i> | Mycgr3G90232            | 1:5667618-5671029 | 0.1  | 0.2 | 0.3               | 0.8   | 0.4   | 0.1    | 0.2    |
| <i>pseudoAGO4</i> | Mycgr3G25632            | 1:4995448-4996504 | 1.3  | 1.3 | 7.2               | 0.0   | 2.0   | 2.0    | 1.0    |
| <i>ZtRDRP1</i>    | Mycgr3G51407            | 13:605705-608630  | 1.0  | 0.9 | 1.5               | 1.6   | 1.3   | 0.7    | 0.4    |
| <i>ZtRDRP2</i>    | Mycgr3G49833            | 11:202398-206395  | 0.6  | 0.5 | 0.2               | 0.6   | 1.4   | 1.2    | 1.4    |

† Expression levels of the candidate genes was inferred based on the previously published RNAseq data (Rudd *et al.*, 2015) and is shown as FPKM (fragments per kilobase of exon model per million reads mapped) values

‡ *Zymoseptoria tritici* isolate IPO323 was grown in vitro in low nutrients CDB (Czapek Dox Broth) or high nutrients PDB (Potato Dextrose Broth) media. The same fungal isolate was also inoculated onto the leaves of susceptible wheat cv. Riband and gene expression assessed at 1, 4, 9, 14, and 21 dpi (days post inoculation).

**Table S3.** Alignment rate of sRNA sequencing reads to the *Zymoseptoria tritici* (Zt) isolate IPO323 genome from 30 *in vitro* and *in planta* samples.

| Sample name | Sample description                                            | Number of input reads | Alignment rate (%) |
|-------------|---------------------------------------------------------------|-----------------------|--------------------|
| BW0-1       | Healthy uninoculated control wheat cv. Bobwhite               | 1,713,836             | 3.44               |
| BW0-2       | Healthy uninoculated control wheat cv. Bobwhite               | 6,139,812             | 1.72               |
| BW0-3       | Healthy uninoculated control wheat cv. Bobwhite               | 5,744,866             | 1.44               |
| CDB-1       | Fungus cultured <i>in vitro</i> (in Czapek-Dox Broth)         | 5,962,085             | 61.12              |
| CDB-2       | Fungus cultured <i>in vitro</i> (in Czapek-Dox Broth)         | 5,489,439             | 52.46              |
| CDB-3       | Fungus cultured <i>in vitro</i> (in Czapek-Dox Broth)         | 5,804,472             | 51.79              |
| BWM4-1      | Wheat cv. Bobwhite sampled at 4 days post mock inoculation    | 4,929,559             | 2.20               |
| BWM4-2      | Wheat cv. Bobwhite sampled at 4 days post mock inoculation    | 2,898,526             | 2.67               |
| BWM4-3      | Wheat cv. Bobwhite sampled at 4 days post mock inoculation    | 4,774,689             | 3.25               |
| BWZt4-1     | Wheat cv. Bobwhite sampled at 4 days post fungal inoculation  | 6,227,127             | 5.70               |
| BWZt4-2     | Wheat cv. Bobwhite sampled at 4 days post fungal inoculation  | 6,395,321             | 2.92               |
| BWZt4-3     | Wheat cv. Bobwhite sampled at 4 days post fungal inoculation  | 4,939,622             | 4.11               |
| BWM9-1      | Wheat cv. Bobwhite sampled at 9 days post mock inoculation    | 4,841,465             | 1.89               |
| BWM9-2      | Wheat cv. Bobwhite sampled at 9 days post mock inoculation    | 4,431,331             | 1.46               |
| BWM9-3      | Wheat cv. Bobwhite sampled at 9 days post mock inoculation    | 3,717,393             | 1.97               |
| BWZt9-1     | Wheat cv. Bobwhite sampled at 9 days post fungal inoculation  | 6,718,653             | 7.18               |
| BWZt9-2     | Wheat cv. Bobwhite sampled at 9 days post fungal inoculation  | 5,846,043             | 6.40               |
| BWZt9-3     | Wheat cv. Bobwhite sampled at 9 days post fungal inoculation  | 6,381,610             | 6.68               |
| BWM13-1     | Wheat cv. Bobwhite sampled at 13 days post mock inoculation   | 5,279,980             | 2.16               |
| BWM13-2     | Wheat cv. Bobwhite sampled at 13 days post mock inoculation   | 5,751,607             | 2.97               |
| BWM13-3     | Wheat cv. Bobwhite sampled at 13 days post mock inoculation   | 1,937,591             | 2.98               |
| BWZt13-1    | Wheat cv. Bobwhite sampled at 13 days post fungal inoculation | 5,053,219             | 15.28              |
| BWZt13-2    | Wheat cv. Bobwhite sampled at 13 days post fungal inoculation | 4,190,908             | 25.60              |
| BWZt13-3    | Wheat cv. Bobwhite sampled at 13 days post fungal inoculation | 4,203,443             | 19.27              |
| BWM21-1     | Wheat cv. Bobwhite sampled at 21 days post mock inoculation   | 5,379,386             | 2.88               |
| BWM21-2     | Wheat cv. Bobwhite sampled at 21 days post mock inoculation   | 5,422,889             | 2.40               |
| BWM21-3     | Wheat cv. Bobwhite sampled at 21 days post mock inoculation   | 2,716,384             | 1.89               |
| BWZt21-1    | Wheat cv. Bobwhite sampled at 21 days post fungal inoculation | 4,426,578             | 35.13              |
| BWZt21-2    | Wheat cv. Bobwhite sampled at 21 days post fungal inoculation | 3,446,552             | 31.81              |
| BWZt21-3    | Wheat cv. Bobwhite sampled at 21 days post fungal inoculation | 2,982,932             | 27.04              |

**Table S4.** Computationally predicted *Zymoseptoria tritici* IPO323 sRNA loci.

| sRNA locus ID     | chromosome | start (nt) | end (nt) | length (nt) | sRNA read counts from all samples | overlaps with protein coding genes | overlaps with other genes | overlaps with TE / repetitive elements | sRNA loci active at 4, 9, 13, or 21 dpi during wheat infection | posterior probability difference† | Min FDR differential expression‡ |
|-------------------|------------|------------|----------|-------------|-----------------------------------|------------------------------------|---------------------------|----------------------------------------|----------------------------------------------------------------|-----------------------------------|----------------------------------|
| 1.2.24760         | 1          | 2          | 24760    | 24759       | 29600                             |                                    |                           |                                        | BWZt4 BWZt9 BWZt13 BWZt21                                      | 0.99                              | 0.00                             |
| 1.24832.33907     | 1          | 24832      | 33907    | 9076        | 7406                              |                                    |                           | yes                                    | BWZt4 BWZt9 BWZt13 BWZt21                                      | 1.00                              | 0.00                             |
| 1.52723.55652     | 1          | 52723      | 55652    | 2930        | 2665                              |                                    |                           | yes                                    | BWZt9 BWZt13 BWZt21                                            | 1.00                              | 0.00                             |
| 1.55724.59340     | 1          | 55724      | 59340    | 3617        | 3434                              |                                    |                           | yes                                    | BWZt9 BWZt13 BWZt21                                            | 1.00                              | 0.00                             |
| 1.59399.69532     | 1          | 59399      | 69532    | 10134       | 7238                              |                                    |                           | yes                                    | BWZt9 BWZt13 BWZt21                                            | 1.00                              | 0.00                             |
| 1.132780.135800   | 1          | 132780     | 135800   | 3021        | 498                               | yes                                |                           |                                        | BWZt13 BWZt21                                                  | 1.00                              | 0.01                             |
| 1.168753.169514   | 1          | 168753     | 169514   | 762         | 7814                              |                                    |                           | yes                                    | BWZt4 BWZt9 BWZt13 BWZt21                                      | 1.00                              | 0.00                             |
| 1.610884.611019   | 1          | 610884     | 611019   | 136         | 2523                              |                                    |                           |                                        | BWZt9 BWZt13 BWZt21                                            | 1.00                              | 0.00                             |
| 1.681033.681226   | 1          | 681033     | 681226   | 194         | 1345                              | yes                                |                           |                                        | BWZt9 BWZt13 BWZt21                                            | 1.00                              | 0.00                             |
| 1.686410.686631   | 1          | 686410     | 686631   | 222         | 872                               | yes                                |                           |                                        | BWZt13 BWZt21                                                  | 1.00                              | 0.04                             |
| 1.802150.802635   | 1          | 802150     | 802635   | 486         | 4664                              |                                    |                           |                                        | BWZt13                                                         | 1.00                              | 0.00                             |
| 1.809089.809248   | 1          | 809089     | 809248   | 160         | 1207                              |                                    |                           |                                        | BWZt13                                                         | 1.00                              | 0.01                             |
| 1.912518.913393   | 1          | 912518     | 913393   | 876         | 5584                              |                                    |                           | yes                                    | BWZt9 BWZt13 BWZt21                                            | 1.00                              | 0.00                             |
| 1.952268.954112   | 1          | 952268     | 954112   | 1845        | 2446                              | yes                                |                           |                                        | BWZt13 BWZt21                                                  | 1.00                              | 0.00                             |
| 1.1088031.1088594 | 1          | 1088031    | 1088594  | 564         | 938                               |                                    |                           |                                        | BWZt4 BWZt9 BWZt13 BWZt21                                      | 1.00                              | 0.00                             |
| 1.1432722.1433785 | 1          | 1432722    | 1433785  | 1064        | 6332                              | yes                                |                           | yes                                    | BWZt4 BWZt9 BWZt13 BWZt21                                      | 1.00                              | 0.00                             |
| 1.2088218.2090311 | 1          | 2088218    | 2090311  | 2094        | 525                               | yes                                |                           |                                        | BWZt13 BWZt21                                                  | 1.00                              | 0.02                             |
| 1.2630102.2631752 | 1          | 2630102    | 2631752  | 1651        | 1029                              | yes                                |                           |                                        | BWZt21                                                         | 1.00                              | 0.00                             |
| 1.3024339.3025761 | 1          | 3024339    | 3025761  | 1423        | 1546                              | yes                                |                           |                                        | BWZt13 BWZt21                                                  | 1.00                              | 0.02                             |
| 1.3107284.3109571 | 1          | 3107284    | 3109571  | 2288        | 17700                             | yes                                |                           | yes                                    | BWZt4 BWZt9 BWZt13 BWZt21                                      | 1.00                              | 0.00                             |
| 1.3175256.3175844 | 1          | 3175256    | 3175844  | 589         | 2550                              | yes                                |                           | yes                                    | BWZt4 BWZt9 BWZt13 BWZt21                                      | 1.00                              | 0.00                             |
| 1.3404853.3405015 | 1          | 3404853    | 3405015  | 163         | 648000                            |                                    | 5S rRNA                   |                                        | BWZt9 BWZt13 BWZt21                                            | 1.00                              | 0.00                             |
| 1.3788931.3792998 | 1          | 3788931    | 3792998  | 4068        | 470                               | yes                                |                           |                                        | BWZt13 BWZt21                                                  | 1.00                              | 0.02                             |
| 1.3817478.3818480 | 1          | 3817478    | 3818480  | 1003        | 282                               | yes                                |                           |                                        | BWZt21                                                         | 1.00                              | 0.02                             |
| 1.3864242.3867547 | 1          | 3864242    | 3867547  | 3306        | 423                               | yes                                |                           |                                        | BWZt21                                                         | 1.00                              | 0.01                             |
| 1.4059657.4059846 | 1          | 4059657    | 4059846  | 190         | 840                               |                                    |                           |                                        | BWZt13 BWZt21                                                  | 1.00                              | 0.01                             |
| 1.4098242.4102440 | 1          | 4098242    | 4102440  | 4199        | 762                               | yes                                |                           |                                        | BWZt13 BWZt21                                                  | 1.00                              | 0.00                             |
| 1.4411833.4412084 | 1          | 4411833    | 4412084  | 252         | 31300                             |                                    |                           |                                        | BWZt4 BWZt9 BWZt13 BWZt21                                      | 1.00                              | 0.00                             |
| 1.4420671.4420786 | 1          | 4420671    | 4420786  | 116         | 2793                              | yes                                |                           |                                        | BWZt13 BWZt21                                                  | 1.00                              | 0.00                             |
| 1.4461121.4461429 | 1          | 4461121    | 4461429  | 309         | 2637                              |                                    | tRNA-Arg                  |                                        | BWZt4 BWZt9 BWZt13 BWZt21                                      | 1.00                              | 0.00                             |
| 1.4500965.4502701 | 1          | 4500965    | 4502701  | 1737        | 872                               | yes                                |                           |                                        | BWZt13 BWZt21                                                  | 1.00                              | 0.02                             |
| 1.4519579.4520495 | 1          | 4519579    | 4520495  | 917         | 6544                              |                                    |                           | yes                                    | BWZt4 BWZt9 BWZt13 BWZt21                                      | 1.00                              | 0.00                             |
| 1.4532087.4532257 | 1          | 4532087    | 4532257  | 171         | 2776                              |                                    | 5S rRNA                   |                                        | BWZt4 BWZt9 BWZt13 BWZt21                                      | 1.00                              | 0.00                             |
| 1.4859784.4862055 | 1          | 4859784    | 4862055  | 2272        | 1326                              | yes                                |                           |                                        | BWZt13 BWZt21                                                  | 1.00                              | 0.01                             |
| 1.5027663.5030714 | 1          | 5027663    | 5030714  | 3052        | 1058                              | yes                                |                           |                                        | BWZt13 BWZt21                                                  | 1.00                              | 0.00                             |
| 1.5208279.5209283 | 1          | 5208279    | 5209283  | 1005        | 6982                              |                                    |                           | yes                                    | BWZt4 BWZt9 BWZt13 BWZt21                                      | 1.00                              | 0.00                             |
| 1.5370559.5371316 | 1          | 5370559    | 5371316  | 758         | 1768                              | yes                                |                           |                                        | BWZt21                                                         | 1.00                              | 0.01                             |
| 1.5574650.5575522 | 1          | 5574650    | 5575522  | 873         | 9652                              |                                    |                           |                                        | BWZt13 BWZt21                                                  | 1.00                              | 0.00                             |
| 1.5935918.5953168 | 1          | 5935918    | 5953168  | 17251       | 12900                             | yes                                |                           |                                        | BWZt13                                                         | 1.00                              | 0.00                             |
| 1.6022523.6024517 | 1          | 6022523    | 6024517  | 1995        | 2563                              |                                    |                           | yes                                    | BWZt9 BWZt13 BWZt21                                            | 1.00                              | 0.00                             |
| 1.6024577.6027831 | 1          | 6024577    | 6027831  | 3255        | 1941                              | yes                                |                           | yes                                    | BWZt9 BWZt13 BWZt21                                            | 1.00                              | 0.00                             |
| 1.6042189.6044283 | 1          | 6042189    | 6044283  | 2095        | 2270                              | yes                                |                           | yes                                    | BWZt9 BWZt13 BWZt21                                            | 1.00                              | 0.00                             |
| 1.6044579.6052106 | 1          | 6044579    | 6052106  | 7528        | 5140                              | yes                                |                           | yes                                    | BWZt9 BWZt13 BWZt21                                            | 1.00                              | 0.00                             |
| 1.6052501.6055814 | 1          | 6052501    | 6055814  | 3314        | 1568                              | yes                                |                           | yes                                    | BWZt9 BWZt13 BWZt21                                            | 1.00                              | 0.00                             |
| 1.6055877.6056728 | 1          | 6055877    | 6056728  | 852         | 487                               | yes                                |                           | yes                                    | BWZt9 BWZt13 BWZt21                                            | 1.00                              | 0.01                             |
| 1.6060199.6062484 | 1          | 6060199    | 6062484  | 2286        | 970                               | yes                                |                           | yes                                    | BWZt9 BWZt13 BWZt21                                            | 1.00                              | 0.00                             |
| 1.6062562.6077812 | 1          | 6062562    | 6077812  | 15251       | 13200                             | yes                                |                           | yes                                    | BWZt9 BWZt13 BWZt21                                            | 1.00                              | 0.00                             |
| 1.6077865.6084551 | 1          | 6077865    | 6084551  | 6687        | 4298                              | yes                                |                           | yes                                    | BWZt9 BWZt13 BWZt21                                            | 1.00                              | 0.00                             |
| 2.17721.18726     | 2          | 17721      | 18726    | 1006        | 6063                              | yes                                |                           | yes                                    | BWZt9 BWZt13 BWZt21                                            | 1.00                              | 0.00                             |
| 2.47729.49709     | 2          | 47729      | 49709    | 1981        | 7360                              |                                    |                           | yes                                    | BWZt4 BWZt9 BWZt13 BWZt21                                      | 1.00                              | 0.00                             |
| 2.236665.237674   | 2          | 236665     | 237674   | 1010        | 8376                              | yes                                |                           | yes                                    | BWZt4 BWZt9 BWZt13 BWZt21                                      | 1.00                              | 0.00                             |
| 2.341988.345005   | 2          | 341988     | 345005   | 3018        | 17800                             | yes                                |                           | yes                                    | BWZt4 BWZt9 BWZt13 BWZt21                                      | 1.00                              | 0.00                             |
| 2.400134.400399   | 2          | 400134     | 400399   | 266         | 6122                              |                                    |                           |                                        | BWZt4 BWZt9 BWZt13 BWZt21                                      | 1.00                              | 0.00                             |
| 2.532319.532572   | 2          | 532319     | 532572   | 254         | 648000                            |                                    | 5S rRNA                   |                                        | BWZt4 BWZt9 BWZt13 BWZt21                                      | 1.00                              | 0.00                             |
| 2.715507.715678   | 2          | 715507     | 715678   | 172         | 2319                              |                                    |                           |                                        | BWZt13                                                         | 1.00                              | 0.01                             |
| 2.819512.820307   | 2          | 819512     | 820307   | 796         | 5263                              |                                    |                           | yes                                    | BWZt4 BWZt9 BWZt13 BWZt21                                      | 1.00                              | 0.00                             |
| 2.1061972.1062929 | 2          | 1061972    | 1062929  | 958         | 9003                              |                                    |                           | yes                                    | BWZt4 BWZt9 BWZt13 BWZt21                                      | 1.00                              | 0.00                             |
| 2.1128831.1132146 | 2          | 1128831    | 1132146  | 3316        | 1909                              | yes                                |                           |                                        | BWZt9 BWZt13 BWZt21                                            | 1.00                              | 0.00                             |
| 2.1295279.1297239 | 2          | 1295279    | 1297239  | 1961        | 338                               | yes                                |                           |                                        | BWZt13 BWZt21                                                  | 1.00                              | 0.01                             |
| 2.1326532.1328523 | 2          | 1326532    | 1328523  | 1992        | 721                               | yes                                |                           |                                        | BWZt13                                                         | 1.00                              | 0.03                             |
| 2.1333569.1334006 | 2          | 1333569    | 1334006  | 438         | 2840                              |                                    |                           |                                        | BWZt13 BWZt21                                                  | 1.00                              | 0.00                             |
| 2.1441675.1441950 | 2          | 1441675    | 1441950  | 276         | 70400                             |                                    |                           | tRNA-Ser                               | BWZt4 BWZt9 BWZt13 BWZt21                                      | 1.00                              | 0.00                             |
| 2.1664358.1664628 | 2          | 1664358    | 1664628  | 271         | 513                               |                                    |                           |                                        | BWZt4 BWZt9 BWZt13 BWZt21                                      | 1.00                              | 0.00                             |
| 2.1741314.1742939 | 2          | 1741314    | 1742939  | 1626        | 10100                             | yes                                |                           | yes                                    | BWZt4 BWZt9 BWZt13 BWZt21                                      | 1.00                              | 0.00                             |
| 2.1895220.1896101 | 2          | 1895220    | 1896101  | 882         | 3764                              |                                    |                           |                                        | BWZt4 BWZt9 BWZt13 BWZt21                                      | 1.00                              | 0.00                             |
| 2.1903263.1903455 | 2          | 1903263    | 1903455  | 193         | 648000                            |                                    | 5S rRNA                   |                                        | BWZt4 BWZt9 BWZt13 BWZt21                                      | 1.00                              | 0.00                             |
| 2.1909278.1910404 | 2          | 1909278    | 1910404  | 1127        | 6408                              |                                    |                           | yes                                    | BWZt4 BWZt9 BWZt13 BWZt21                                      | 1.00                              | 0.00                             |
| 2.1925528.1927912 | 2          | 1925528    | 1927912  | 2385        | 279                               | yes                                |                           |                                        | BWZt13                                                         | 1.00                              | 0.03                             |
| 2.2093476.2093705 | 2          | 2093476    | 2093705  | 230         | 16200                             | yes                                |                           |                                        | BWZt4 BWZt13 BWZt21                                            | 1.00                              | 0.00                             |
| 2.2362398.2364568 | 2          | 2362398    | 2364568  | 2171        | 454                               | yes                                |                           |                                        | BWZt21                                                         | 1.00                              | 0.00                             |
| 2.2743117.2744701 | 2          | 2743117    | 2744701  | 1585        | 281                               | yes                                |                           |                                        | BWZt21                                                         | 1.00                              | 0.02                             |
| 2.2748785.2750628 | 2          | 2748785    | 2750628  | 1844        | 1124                              | yes                                |                           |                                        | BWZt21                                                         | 1.00                              | 0.01                             |
| 2.2777908.2780777 | 2          | 2777908    | 2780777  | 2870        | 1254                              | yes                                |                           |                                        | BWZt21                                                         | 0.99                              | 0.02                             |
| 2.2865736.2866983 | 2          | 2865736    | 2866983  | 1248        | 1445                              | yes                                |                           |                                        | BWZt9                                                          | 1.00                              | 0.03                             |
| 2.3153789.3154883 | 2          | 3153789    | 3154883  | 1095        | 1498                              | yes                                |                           |                                        | BWZt4 BWZt9 BWZt13 BWZt21                                      | 1.00                              | 0.00                             |
| 2.3187737.3188483 | 2          | 3187737    | 3188483  | 747         | 6216                              |                                    |                           | yes                                    | BWZt4 BWZt9 BWZt13 BWZt21                                      | 1.00                              | 0.00                             |
| 2.3189040.3189775 | 2          | 3189040    | 3189775  | 736         | 7256                              | yes                                |                           | yes                                    | BWZt4 BWZt9 BWZt13 BWZt21                                      | 1.00                              | 0.00                             |
| 2.3276658.3277710 | 2          | 3276658    | 3277710  | 1053        | 8657                              | yes                                |                           | yes                                    | BWZt4 BWZt9 BWZt13 BWZt21                                      | 1.00                              | 0.00                             |
| 2.3411312.3412084 | 2          | 3411312    | 3412084  | 773         | 2302                              |                                    |                           |                                        | BWZt9 BWZt13 BWZt21                                            | 1.00                              | 0.00                             |
| 2.3632877.3633814 | 2          | 3632877    | 3633814  | 938         | 4419                              | yes                                |                           | yes                                    | BWZt4 BWZt9 BWZt13 BWZt21                                      | 1.00                              | 0.00                             |
| 2.3801864.3816890 | 2          | 3801864    | 3816890  | 15027       | 15300                             |                                    |                           |                                        | BWZt4 BWZt9 BWZt13 BWZt21                                      | 1.00                              | 0.00                             |
| 2.3816969.3821391 | 2          | 3816969    | 3821391  | 4423        | 3528                              | yes                                |                           |                                        | BWZt9 BWZt13 BWZt21                                            | 1.00                              | 0.00                             |
| 2.3821445.3822997 | 2          | 3821445    | 3822997  | 1553        | 596                               | yes                                |                           |                                        | BWZt9 BWZt13 BWZt21                                            | 1.00                              | 0.00                             |
| 2.3823060.3839541 | 2          | 3823060    | 3839541  | 16482       | 16200                             | yes                                |                           |                                        | BWZt9 BWZt13 BWZt21                                            | 1.00                              | 0.00                             |
| 2.3839620.3844042 | 2          | 3839620    | 3844042  | 4423        | 3603                              | yes                                |                           |                                        | BWZt9 BWZt13 BWZt21                                            | 1.00                              | 0.00                             |
| 2.3844121.3848381 | 2          | 3844121    | 3848381  | 4261        | 1931                              | yes                                |                           |                                        | BWZt9 BWZt13 BWZt21                                            | 1.00                              | 0.00                             |
| 3.1178.7084       | 3          | 1178       | 7084     | 5907        | 3149                              |                                    |                           | yes                                    | BWZt9 BWZt13 BWZt21                                            | 1.00                              | 0.00                             |
| 3.7151.18710      | 3          | 7151       | 18710    | 11560       | 12200                             |                                    |                           | yes                                    | BWZt4 BWZt9 BWZt13 BWZt21                                      | 1.00                              | 0.00                             |
| 3.218432.218715   | 3          | 218432     | 218715   | 284         | 1229                              |                                    |                           |                                        | BWZt13 BWZt21                                                  | 1.00                              | 0.00                             |
| 3.387886.388363   | 3          | 387886     | 388363   | 478         | 867                               |                                    |                           |                                        | BWZt13 BWZt21                                                  | 1.00                              | 0.01                             |
| 3.391037.392727   | 3          | 391037     | 392727   | 1691        | 5811                              |                                    |                           | yes                                    | BWZt4 BWZt9 BWZt13 BWZt21                                      | 1.00                              | 0.00                             |
| 3.401660.407274   | 3          | 401660     | 407274   | 5615        | 5891                              |                                    |                           | yes                                    | BWZt9 BWZt13 BWZt21                                            | 1.00                              | 0.00                             |
| 3.448737.450457   | 3          | 448737     | 450457   | 1721        | 379                               | yes                                |                           |                                        | BWZt21                                                         | 1.00                              | 0.01                             |
| 3.451342.453408   | 3          | 451342     | 453408   | 2067        | 395                               | yes                                |                           |                                        | BWZt21                                                         | 1.00                              | 0.00                             |
| 3.587789.590578   | 3          | 587789     | 590578   | 2790        | 8793                              |                                    |                           | yes                                    | BWZt4 BWZt9 BWZt13 BWZt21                                      | 1.00                              | 0.00                             |
| 3.699143.699357   | 3          | 699143     | 699357   | 215         | 4222                              |                                    |                           |                                        | BWZt13 BWZt21                                                  | 1.00                              | 0.00                             |
| 3.759692.759839   | 3          | 759692     | 759839   | 148         | 1314                              |                                    |                           |                                        | BWZt9 BWZt13 BWZt21                                            | 1.00                              | 0.00                             |
| 3.822679.823459   | 3          | 822679     | 823459   | 781         | 8275                              | yes                                |                           | yes                                    | BWZt4 BWZt9 BWZt13 BWZt21                                      | 1.00                              | 0                                |

|                   |   |         |         |       |        |     |         |         |       |       |        |        |        |      |      |
|-------------------|---|---------|---------|-------|--------|-----|---------|---------|-------|-------|--------|--------|--------|------|------|
| 3.3241153.3242334 | 3 | 3241153 | 3242334 | 1182  | 651000 | yes | 5S rRNA |         | BWZt4 | BWZt9 | BWZt13 | BWZt21 | 1.00   | 0.00 |      |
| 3.3403412.3404238 | 3 | 3403412 | 3404238 | 827   | 8607   |     |         | yes     | BWZt4 | BWZt9 | BWZt13 | BWZt21 | 1.00   | 0.00 |      |
| 3.3468771.3476338 | 3 | 3468771 | 3476338 | 7568  | 2969   |     |         |         | BWZt4 | BWZt9 | BWZt13 | BWZt21 | 1.00   | 0.00 |      |
| 3.3486626.3493394 | 3 | 3486626 | 3493394 | 6769  | 1790   |     |         | yes     |       | BWZt9 | BWZt13 | BWZt21 | 1.00   | 0.00 |      |
| 3.3496451.3502010 | 3 | 3496452 | 3502010 | 5559  | 1689   | yes |         |         |       | BWZt9 | BWZt13 | BWZt21 | 1.00   | 0.00 |      |
| 4.8404.10428      | 4 | 8404    | 10428   | 2025  | 1273   |     |         | yes     |       | BWZt9 | BWZt13 | BWZt21 | 1.00   | 0.00 |      |
| 4.10488.12213     | 4 | 10488   | 12213   | 1726  | 565    |     |         | yes     |       |       | BWZt13 | BWZt21 | 1.00   | 0.01 |      |
| 4.170472.171758   | 4 | 170472  | 171758  | 1287  | 7978   |     |         | yes     | BWZt4 | BWZt9 | BWZt13 | BWZt21 | 1.00   | 0.00 |      |
| 4.234947.235725   | 4 | 234947  | 235725  | 779   | 6692   |     |         | yes     | BWZt4 | BWZt9 | BWZt13 | BWZt21 | 1.00   | 0.00 |      |
| 4.241532.242398   | 4 | 241532  | 242398  | 867   | 7016   |     |         | yes     |       | BWZt9 | BWZt13 | BWZt21 | 1.00   | 0.00 |      |
| 4.272845.274005   | 4 | 272845  | 274005  | 1161  | 6626   |     |         | yes     | BWZt4 | BWZt9 | BWZt13 | BWZt21 | 1.00   | 0.00 |      |
| 4.356163.358445   | 4 | 356163  | 358445  | 2283  | 577    | yes |         |         |       |       |        | BWZt21 | 1.00   | 0.02 |      |
| 4.595344.597737   | 4 | 595344  | 597737  | 2394  | 796    | yes |         |         |       |       |        | BWZt21 | 1.00   | 0.02 |      |
| 4.919278.919425   | 4 | 919278  | 919425  | 148   | 4403   |     |         |         | BWZt4 | BWZt9 | BWZt13 | BWZt21 | 1.00   | 0.00 |      |
| 4.1251113.1252024 | 4 | 1251113 | 1252024 | 912   | 7241   |     |         | yes     | BWZt4 | BWZt9 | BWZt13 | BWZt21 | 1.00   | 0.00 |      |
| 4.1428859.1429718 | 4 | 1428859 | 1429718 | 860   | 6218   |     |         | yes     | BWZt4 | BWZt9 | BWZt13 | BWZt21 | 1.00   | 0.00 |      |
| 4.2028875.2030805 | 4 | 2028875 | 2030805 | 1931  | 3750   | yes |         |         | BWZt4 | BWZt9 |        | BWZt21 | 1.00   | 0.00 |      |
| 4.2215448.2215980 | 4 | 2215448 | 2215980 | 533   | 1231   |     |         |         | BWZt4 | BWZt9 |        | BWZt21 | 1.00   | 0.00 |      |
| 4.2228316.2228727 | 4 | 2228316 | 2228727 | 412   | 5160   |     |         |         |       |       | BWZt13 | BWZt21 | 1.00   | 0.00 |      |
| 4.2261891.2262208 | 4 | 2261891 | 2262208 | 318   | 780    |     |         |         |       |       | BWZt13 |        | 1.00   | 0.02 |      |
| 4.2562105.2562351 | 4 | 2562105 | 2562351 | 247   | 14200  |     |         |         |       |       | BWZt13 |        | 1.00   | 0.00 |      |
| 4.2644748.2645586 | 4 | 2644748 | 2645586 | 839   | 7707   |     |         | yes     | BWZt4 | BWZt9 | BWZt13 | BWZt21 | 1.00   | 0.00 |      |
| 4.2866934.2868658 | 4 | 2866934 | 2868658 | 1725  | 5776   |     |         | yes     | BWZt4 | BWZt9 | BWZt13 | BWZt21 | 1.00   | 0.00 |      |
| 4.2869853.2880010 | 4 | 2869853 | 2880010 | 10158 | 6478   |     |         | yes     |       | BWZt9 | BWZt13 |        | 1.00   | 0.00 |      |
| 5.59060.61544     | 5 | 59060   | 61544   | 2485  | 1647   |     |         | yes     |       |       | BWZt9  | BWZt13 | BWZt21 | 1.00 | 0.00 |
| 5.181519.182321   | 5 | 181519  | 182321  | 803   | 7098   |     |         | yes     | BWZt4 | BWZt9 | BWZt13 | BWZt21 | 1.00   | 0.00 |      |
| 5.250300.250376   | 5 | 250300  | 250376  | 77    | 680    | yes |         |         |       |       | BWZt13 |        | 1.00   | 0.00 |      |
| 5.308748.309026   | 5 | 308748  | 309026  | 279   | 358    |     |         |         |       |       |        | BWZt21 | 1.00   | 0.03 |      |
| 5.514262.514929   | 5 | 514262  | 514929  | 668   | 648000 | yes | 5S rRNA |         | BWZt4 | BWZt9 | BWZt13 | BWZt21 | 1.00   | 0.00 |      |
| 5.523622.524805   | 5 | 523622  | 524805  | 1184  | 5827   |     |         | yes     | BWZt4 | BWZt9 | BWZt13 | BWZt21 | 1.00   | 0.00 |      |
| 5.557661.560726   | 5 | 557661  | 560726  | 3066  | 17900  | yes |         |         | BWZt4 | BWZt9 | BWZt13 | BWZt21 | 1.00   | 0.00 |      |
| 5.561012.563057   | 5 | 561012  | 563057  | 2046  | 534    | yes |         |         |       |       |        | BWZt21 | 1.00   | 0.01 |      |
| 5.748438.748459   | 5 | 748438  | 748459  | 22    | 4191   | yes |         |         |       | BWZt9 | BWZt13 |        | 1.00   | 0.00 |      |
| 5.849612.850341   | 5 | 849612  | 850341  | 730   | 367    | yes |         |         |       |       |        | BWZt21 | 1.00   | 0.01 |      |
| 5.912353.914719   | 5 | 912353  | 914719  | 2367  | 399    | yes |         |         | BWZt4 |       |        |        | 1.00   | 0.02 |      |
| 5.918436.919203   | 5 | 918436  | 919203  | 768   | 7368   |     |         | yes     | BWZt4 | BWZt9 | BWZt13 | BWZt21 | 1.00   | 0.00 |      |
| 5.934505.936848   | 5 | 934505  | 936848  | 2344  | 6860   |     |         |         | BWZt4 | BWZt9 | BWZt13 | BWZt21 | 1.00   | 0.00 |      |
| 5.1045197.1045805 | 5 | 1045197 | 1045805 | 609   | 3609   |     |         | snRNA   | BWZt4 | BWZt9 | BWZt13 |        | 1.00   | 0.00 |      |
| 5.1092026.1092263 | 5 | 1092026 | 1092263 | 238   | 593    |     |         |         |       | BWZt9 | BWZt13 |        | 1.00   | 0.00 |      |
| 5.1092560.1092727 | 5 | 1092560 | 1092727 | 168   | 7446   |     |         |         | BWZt4 |       |        |        | 1.00   | 0.00 |      |
| 5.1098642.1098834 | 5 | 1098642 | 1098834 | 193   | 7171   |     |         |         | BWZt4 | BWZt9 | BWZt13 | BWZt21 | 1.00   | 0.00 |      |
| 5.1130578.1135063 | 5 | 1130578 | 1135063 | 4486  | 1317   | yes |         |         |       | BWZt9 | BWZt13 |        | 1.00   | 0.00 |      |
| 5.1875780.1875912 | 5 | 1875780 | 1875912 | 133   | 2761   |     |         |         | BWZt4 | BWZt9 | BWZt13 | BWZt21 | 1.00   | 0.00 |      |
| 5.2094726.2095999 | 5 | 2094726 | 2095999 | 1274  | 566    | yes |         |         |       |       | BWZt9  | BWZt13 | BWZt21 | 1.00 | 0.00 |
| 5.2318983.2319321 | 5 | 2318983 | 2319321 | 339   | 11400  |     |         |         | BWZt4 | BWZt9 | BWZt13 | BWZt21 | 1.00   | 0.00 |      |
| 5.2486971.2487211 | 5 | 2486971 | 2487211 | 241   | 3039   |     |         |         |       |       |        | BWZt21 | 1.00   | 0.04 |      |
| 5.2645459.2646021 | 5 | 2645459 | 2646021 | 563   | 836    |     |         | yes     |       |       |        | BWZt21 | 1.00   | 0.02 |      |
| 5.2686132.2687400 | 5 | 2686132 | 2687400 | 1269  | 9195   |     |         | yes     | BWZt4 | BWZt9 | BWZt13 | BWZt21 | 1.00   | 0.00 |      |
| 5.2792872.2793631 | 5 | 2792872 | 2793631 | 760   | 138    | yes |         |         | BWZt4 |       |        |        | 1.00   | 0.03 |      |
| 5.2806545.2846948 | 5 | 2806545 | 2846948 | 40404 | 33100  |     |         | yes     |       | BWZt9 | BWZt13 | BWZt21 | 1.00   | 0.00 |      |
| 5.2850297.2861802 | 5 | 2850297 | 2861802 | 11506 | 12400  |     |         | yes     |       | BWZt9 | BWZt13 | BWZt21 | 1.00   | 0.00 |      |
| 6.13518.16550     | 6 | 13518   | 16550   | 3033  | 1539   |     |         |         |       | BWZt9 | BWZt13 | BWZt21 | 1.00   | 0.00 |      |
| 6.16617.39543     | 6 | 16617   | 39543   | 22927 | 21100  |     |         | yes     | BWZt4 | BWZt9 | BWZt13 | BWZt21 | 1.00   | 0.00 |      |
| 6.39611.43211     | 6 | 39611   | 43211   | 3601  | 4096   |     |         | yes     |       | BWZt9 | BWZt13 | BWZt21 | 1.00   | 0.00 |      |
| 6.173879.174893   | 6 | 173879  | 174893  | 1015  | 7114   |     |         | yes     |       | BWZt9 | BWZt13 | BWZt21 | 1.00   | 0.00 |      |
| 6.212702.213658   | 6 | 212702  | 213658  | 957   | 4395   |     |         | yes     | BWZt4 | BWZt9 | BWZt13 | BWZt21 | 1.00   | 0.00 |      |
| 6.218141.218388   | 6 | 218141  | 218388  | 248   | 1012   |     |         |         |       |       | BWZt13 | BWZt21 | 1.00   | 0.00 |      |
| 6.231370.231410   | 6 | 231370  | 231410  | 41    | 303    |     |         |         | BWZt4 | BWZt9 |        |        | 1.00   | 0.01 |      |
| 6.597638.598424   | 6 | 597638  | 598424  | 787   | 6271   |     |         | yes     | BWZt4 | BWZt9 | BWZt13 | BWZt21 | 1.00   | 0.00 |      |
| 6.673455.674376   | 6 | 673455  | 674376  | 922   | 6257   |     |         | yes     | BWZt4 | BWZt9 | BWZt13 | BWZt21 | 1.00   | 0.00 |      |
| 6.782298.785007   | 6 | 782298  | 785007  | 7210  | 8041   |     |         | yes     | BWZt4 | BWZt9 | BWZt13 | BWZt21 | 1.00   | 0.00 |      |
| 6.804863.807140   | 6 | 804863  | 807140  | 2278  | 7530   |     |         |         | BWZt4 | BWZt9 | BWZt13 | BWZt21 | 1.00   | 0.00 |      |
| 6.927640.928434   | 6 | 927640  | 928434  | 795   | 4317   |     |         | yes     | BWZt4 | BWZt9 | BWZt13 | BWZt21 | 1.00   | 0.00 |      |
| 6.999529.999949   | 6 | 999529  | 999949  | 421   | 6710   |     |         | yes     | BWZt4 | BWZt9 | BWZt13 | BWZt21 | 1.00   | 0.00 |      |
| 6.1267883.1270184 | 6 | 1267883 | 1270184 | 2302  | 1486   |     |         | yes     |       | BWZt9 | BWZt13 | BWZt21 | 1.00   | 0.00 |      |
| 6.1808235.1808688 | 6 | 1808235 | 1808688 | 454   | 11300  |     |         | yes     | BWZt4 | BWZt9 | BWZt13 | BWZt21 | 1.00   | 0.00 |      |
| 6.2022916.2027069 | 6 | 2022916 | 2027069 | 4154  | 9928   |     |         | yes     | BWZt4 | BWZt9 | BWZt13 | BWZt21 | 1.00   | 0.00 |      |
| 6.2108904.2109094 | 6 | 2108904 | 2109094 | 191   | 3494   |     |         |         |       |       | BWZt13 | BWZt21 | 1.00   | 0.00 |      |
| 6.2197358.2198045 | 6 | 2197358 | 2198045 | 688   | 1025   |     |         |         |       | BWZt9 | BWZt13 | BWZt21 | 1.00   | 0.00 |      |
| 6.2414949.2415730 | 6 | 2414949 | 2415730 | 782   | 6236   |     |         | yes     | BWZt4 | BWZt9 | BWZt13 | BWZt21 | 1.00   | 0.00 |      |
| 7.64956.65152     | 7 | 64956   | 65152   | 197   | 651000 |     |         | 5S rRNA | BWZt4 | BWZt9 | BWZt13 | BWZt21 | 1.00   | 0.00 |      |
| 7.95108.95160     | 7 | 95108   | 95160   | 53    | 7758   |     |         |         |       | BWZt9 | BWZt13 | BWZt21 | 1.00   | 0.00 |      |
| 7.127872.128627   | 7 | 127872  | 128627  | 756   | 7253   |     |         | yes     | BWZt4 | BWZt9 | BWZt13 | BWZt21 | 1.00   | 0.00 |      |
| 7.179855.180653   | 7 | 179855  | 180653  | 799   | 5162   |     |         | yes     |       | BWZt9 | BWZt13 | BWZt21 | 1.00   | 0.00 |      |
| 7.299254.300443   | 7 | 299254  | 300443  | 1190  | 1324   | yes |         |         |       |       |        | BWZt21 | 1.00   | 0.05 |      |
| 7.452408.453395   | 7 | 452408  | 453395  | 988   | 8466   |     |         | yes     | BWZt4 | BWZt9 | BWZt13 | BWZt21 | 1.00   | 0.00 |      |
| 7.582594.583749   | 7 | 582594  | 583749  | 1156  | 6210   |     |         | yes     | BWZt4 | BWZt9 | BWZt13 | BWZt21 | 1.00   | 0.00 |      |
| 7.584106.585040   | 7 | 584106  | 585040  | 935   | 7723   |     |         | yes     | BWZt4 | BWZt9 | BWZt13 | BWZt21 | 1.00   | 0.00 |      |
| 7.594685.595311   | 7 | 594685  | 595311  | 847   | 3772   |     |         | yes     | BWZt4 | BWZt9 | BWZt13 | BWZt21 | 1.00   | 0.00 |      |
| 7.755129.758077   | 7 | 755129  | 758077  | 2949  | 7841   |     |         | yes     | BWZt4 | BWZt9 | BWZt13 | BWZt21 | 1.00   | 0.00 |      |
| 7.826820.827289   | 7 | 826820  | 827289  | 470   | 248    |     |         |         |       | BWZt9 |        |        | 1.00   | 0.04 |      |
| 7.883863.884771   | 7 | 883863  | 884771  | 909   | 1091   |     |         |         |       |       | BWZt13 |        | 1.00   | 0.00 |      |
| 7.927599.928416   | 7 | 927599  | 928416  | 818   | 6923   |     |         | yes     | BWZt4 | BWZt9 | BWZt13 | BWZt21 | 1.00   | 0.00 |      |
| 7.951736.951950   | 7 | 951736  | 951950  | 215   | 854    |     |         |         |       |       | BWZt13 | BWZt21 | 1.00   | 0.00 |      |
| 7.1165974.1167274 | 7 | 1165974 | 1167274 | 1301  | 4533   | yes |         |         | BWZt4 |       | BWZt13 | BWZt21 | 1.00   | 0.00 |      |
| 7.1263898.1264763 | 7 | 1263898 | 1264763 | 866   | 7224   |     |         | yes     | BWZt4 | BWZt9 | BWZt13 | BWZt21 | 1.00   | 0.00 |      |
| 7.1351801.1352313 | 7 | 1351801 | 1352313 | 513   | 5993   |     |         |         | BWZt4 | BWZt9 | BWZt13 | BWZt21 | 1.00   | 0.00 |      |
| 7.1677669.1677729 | 7 | 1677669 | 1677729 | 61    | 13600  |     |         |         | BWZt4 | BWZt9 |        | BWZt21 | 1.00   | 0.00 |      |
| 7.1678104.1678175 | 7 | 1678104 | 1678175 | 72    | 5575   |     |         |         |       |       | BWZt13 | BWZt21 | 1.00   | 0.00 |      |
| 7.1685939.1685999 | 7 | 1685939 | 1685999 | 61    | 13600  |     |         |         | BWZt4 | BWZt9 |        | BWZt21 | 1.00   | 0.00 |      |
| 7.1686374.1686445 | 7 | 1686374 | 1686445 | 72    | 5575   |     |         |         |       |       | BWZt13 | BWZt21 |        |      |      |

|                    |    |         |         |       |        |          |         |        |        |        |      |      |
|--------------------|----|---------|---------|-------|--------|----------|---------|--------|--------|--------|------|------|
| 8.1778342.1779282  | 8  | 1778342 | 1779282 | 941   | 6727   | yes      | BWZt4   | BWZt9  | BWZt13 | BWZt21 | 1.00 | 0.00 |
| 8.1779347.1780499  | 8  | 1779347 | 1780499 | 1153  | 7781   | yes      | BWZt4   | BWZt9  | BWZt13 | BWZt21 | 1.00 | 0.00 |
| 8.1816353.1818241  | 8  | 1816353 | 1818241 | 1889  | 4718   |          | BWZt4   | BWZt9  | BWZt13 | BWZt21 | 1.00 | 0.00 |
| 8.1826676.1828336  | 8  | 1826676 | 1828336 | 1661  | 6470   | yes      | BWZt4   | BWZt9  | BWZt13 | BWZt21 | 1.00 | 0.00 |
| 8.1839987.1840797  | 8  | 1839987 | 1840797 | 811   | 6638   | yes      | BWZt4   | BWZt9  | BWZt13 | BWZt21 | 1.00 | 0.00 |
| 8.1960420.1962344  | 8  | 1960420 | 1962344 | 1935  | 814    | yes      | BWZt4   | BWZt9  | BWZt13 | BWZt21 | 1.00 | 0.02 |
| 8.1964648.1966838  | 8  | 1964648 | 1966838 | 2191  | 7782   | yes      | BWZt4   | BWZt9  | BWZt13 | BWZt21 | 1.00 | 0.00 |
| 8.2000570.2000759  | 8  | 2000570 | 2000759 | 190   | 648000 | 5S rRNA  | BWZt4   | BWZt9  | BWZt13 | BWZt21 | 1.00 | 0.00 |
| 8.2011199.2012128  | 8  | 2011199 | 2012128 | 930   | 4458   | yes      | BWZt4   | BWZt9  | BWZt13 | BWZt21 | 1.00 | 0.00 |
| 8.2142675.2143478  | 8  | 2142675 | 2143478 | 804   | 5490   | yes      | BWZt4   | BWZt9  | BWZt13 | BWZt21 | 1.00 | 0.00 |
| 8.2168811.2169041  | 8  | 2168811 | 2169041 | 231   | 15300  | tRNA-Gly | BWZt4   | BWZt9  | BWZt13 | BWZt21 | 1.00 | 0.00 |
| 8.2202983.2203732  | 8  | 2202983 | 2203732 | 750   | 6510   | yes      | BWZt4   | BWZt9  | BWZt13 | BWZt21 | 1.00 | 0.00 |
| 8.2292152.2298576  | 8  | 2292152 | 2298576 | 6425  | 7366   | yes      | BWZt4   | BWZt9  | BWZt13 | BWZt21 | 1.00 | 0.00 |
| 8.2378470.2380599  | 8  | 2378470 | 2380599 | 2130  | 1708   | yes      | BWZt4   | BWZt9  | BWZt13 | BWZt21 | 1.00 | 0.00 |
| 8.2403753.2409329  | 8  | 2403753 | 2409329 | 5577  | 5495   | yes      | BWZt4   | BWZt9  | BWZt13 | BWZt21 | 1.00 | 0.00 |
| 8.2418353.2420254  | 8  | 2418353 | 2420254 | 1902  | 324    | yes      | BWZt4   | BWZt9  | BWZt13 | BWZt21 | 1.00 | 0.03 |
| 8.2428790.2431187  | 8  | 2428790 | 2431187 | 2398  | 443    | yes      | BWZt4   | BWZt9  | BWZt13 | BWZt21 | 1.00 | 0.03 |
| 8.2431279.2439751  | 8  | 2431279 | 2439751 | 8473  | 5831   | yes      | BWZt4   | BWZt9  | BWZt13 | BWZt21 | 1.00 | 0.00 |
| 9.2.19666          | 9  | 2       | 19666   | 19665 | 32500  | yes      | BWZt4   | BWZt9  | BWZt13 | BWZt21 | 0.97 | 0.00 |
| 9.64052.64887      | 9  | 64052   | 64887   | 836   | 8422   | yes      | BWZt4   | BWZt9  | BWZt13 | BWZt21 | 1.00 | 0.00 |
| 9.66682.67503      | 9  | 66682   | 67503   | 822   | 6768   | yes      | BWZt4   | BWZt9  | BWZt13 | BWZt21 | 1.00 | 0.00 |
| 9.166474.167593    | 9  | 166474  | 167593  | 1120  | 427    | yes      | BWZt4   | BWZt9  | BWZt13 | BWZt21 | 1.00 | 0.02 |
| 9.170649.171598    | 9  | 170649  | 171598  | 950   | 1023   | yes      | BWZt4   | BWZt9  | BWZt13 | BWZt21 | 1.00 | 0.02 |
| 9.282960.283771    | 9  | 282960  | 283771  | 812   | 7060   | yes      | BWZt4   | BWZt9  | BWZt13 | BWZt21 | 1.00 | 0.00 |
| 9.293777.294104    | 9  | 293777  | 294104  | 328   | 2067   | yes      | BWZt4   | BWZt9  | BWZt13 | BWZt21 | 1.00 | 0.00 |
| 9.403302.404358    | 9  | 403302  | 404358  | 1057  | 6079   | yes      | BWZt4   | BWZt9  | BWZt13 | BWZt21 | 1.00 | 0.00 |
| 9.406820.407637    | 9  | 406820  | 407637  | 818   | 5652   | yes      | BWZt4   | BWZt9  | BWZt13 | BWZt21 | 1.00 | 0.00 |
| 9.972252.973061    | 9  | 972252  | 973061  | 810   | 6699   | yes      | BWZt4   | BWZt9  | BWZt13 | BWZt21 | 1.00 | 0.00 |
| 9.1327176.1327455  | 9  | 1327176 | 1327455 | 280   | 1079   | yes      | BWZt4   | BWZt9  | BWZt13 | BWZt21 | 1.00 | 0.00 |
| 9.1413289.1414068  | 9  | 1413289 | 1414068 | 780   | 5207   | yes      | BWZt4   | BWZt9  | BWZt13 | BWZt21 | 1.00 | 0.00 |
| 9.1417709.1418662  | 9  | 1417709 | 1418662 | 954   | 7248   | yes      | BWZt4   | BWZt9  | BWZt13 | BWZt21 | 1.00 | 0.00 |
| 9.1426458.1427268  | 9  | 1426458 | 1427268 | 811   | 8397   | yes      | BWZt4   | BWZt9  | BWZt13 | BWZt21 | 1.00 | 0.00 |
| 9.1433239.1434246  | 9  | 1433239 | 1434246 | 1008  | 8398   | yes      | BWZt4   | BWZt9  | BWZt13 | BWZt21 | 1.00 | 0.00 |
| 9.1755672.1756026  | 9  | 1755672 | 1756026 | 355   | 486    |          | BWZt4   | BWZt9  | BWZt13 | BWZt21 | 1.00 | 0.01 |
| 9.1792703.1793023  | 9  | 1792703 | 1793023 | 321   | 535    |          | BWZt4   | BWZt9  | BWZt13 | BWZt21 | 1.00 | 0.03 |
| 9.1904100.1904911  | 9  | 1904100 | 1904911 | 812   | 20600  | yes      | BWZt4   | BWZt9  | BWZt13 | BWZt21 | 1.00 | 0.00 |
| 9.1963691.1964465  | 9  | 1963691 | 1964465 | 775   | 5928   | yes      | BWZt4   | BWZt9  | BWZt13 | BWZt21 | 1.00 | 0.00 |
| 9.1998601.1999461  | 9  | 1998601 | 1999461 | 861   | 8548   | yes      | BWZt4   | BWZt9  | BWZt13 | BWZt21 | 1.00 | 0.00 |
| 9.2127241.2137629  | 9  | 2127241 | 2137629 | 10389 | 8893   | yes      | BWZt4   | BWZt9  | BWZt13 | BWZt21 | 1.00 | 0.00 |
| 10.57964.59013     | 10 | 57964   | 59013   | 1050  | 164    |          | BWZt4   | BWZt9  | BWZt13 | BWZt21 | 1.00 | 0.03 |
| 10.160001.161905   | 10 | 160001  | 161905  | 1905  | 284    |          | BWZt4   | BWZt9  | BWZt13 | BWZt21 | 1.00 | 0.00 |
| 10.229566.233698   | 10 | 229566  | 233698  | 4133  | 1942   | 5S rRNA  | BWZt4   | BWZt9  | BWZt13 | BWZt21 | 1.00 | 0.00 |
| 10.445195.445392   | 10 | 445195  | 445392  | 198   | 651000 |          | BWZt4   | BWZt9  | BWZt13 | BWZt21 | 1.00 | 0.00 |
| 10.531312.533737   | 10 | 531312  | 533737  | 2426  | 1011   |          | BWZt4   | BWZt9  | BWZt13 | BWZt21 | 1.00 | 0.00 |
| 10.797801.797951   | 10 | 797801  | 797951  | 151   | 7899   |          | BWZt4   | BWZt9  | BWZt13 | BWZt21 | 1.00 | 0.00 |
| 10.1059761.1061128 | 10 | 1059761 | 1061128 | 1368  | 308    |          | BWZt4   | BWZt9  | BWZt13 | BWZt21 | 1.00 | 0.02 |
| 10.1407605.1408991 | 10 | 1407605 | 1408991 | 1387  | 7568   | yes      | BWZt4   | BWZt9  | BWZt13 | BWZt21 | 1.00 | 0.00 |
| 10.1638022.1644097 | 10 | 1638022 | 1644097 | 6076  | 5301   | yes      | BWZt4   | BWZt9  | BWZt13 | BWZt21 | 1.00 | 0.00 |
| 11.32325.33623     | 11 | 32325   | 33623   | 1299  | 7625   | yes      | BWZt4   | BWZt9  | BWZt13 | BWZt21 | 1.00 | 0.00 |
| 11.36845.38682     | 11 | 36845   | 38682   | 1838  | 6518   | yes      | BWZt4   | BWZt9  | BWZt13 | BWZt21 | 1.00 | 0.00 |
| 11.760814.761682   | 11 | 760814  | 761682  | 869   | 6828   | yes      | BWZt4   | BWZt9  | BWZt13 | BWZt21 | 1.00 | 0.00 |
| 11.768223.768327   | 11 | 768223  | 768327  | 105   | 1930   |          | BWZt4   | BWZt9  | BWZt13 | BWZt21 | 1.00 | 0.00 |
| 11.984387.985163   | 11 | 984387  | 985163  | 777   | 5718   | yes      | BWZt4   | BWZt9  | BWZt13 | BWZt21 | 1.00 | 0.00 |
| 11.1119359.1119964 | 11 | 1119359 | 1119964 | 606   | 1513   |          | BWZt4   | BWZt9  | BWZt13 | BWZt21 | 1.00 | 0.00 |
| 11.1235102.1235419 | 11 | 1235102 | 1235419 | 318   | 1889   |          | BWZt4   | BWZt9  | BWZt13 | BWZt21 | 1.00 | 0.00 |
| 11.1593332.1594253 | 11 | 1593332 | 1594253 | 922   | 5471   | yes      | BWZt4   | BWZt9  | BWZt13 | BWZt21 | 1.00 | 0.00 |
| 11.1597670.1598473 | 11 | 1597670 | 1598473 | 804   | 5719   | yes      | BWZt4   | BWZt9  | BWZt13 | BWZt21 | 1.00 | 0.00 |
| 11.1615364.1617483 | 11 | 1615364 | 1617483 | 2120  | 672    | yes      | BWZt4   | BWZt9  | BWZt13 | BWZt21 | 1.00 | 0.00 |
| 12.475.5013        | 12 | 475     | 5013    | 4539  | 2488   | yes      | BWZt4   | BWZt9  | BWZt13 | BWZt21 | 1.00 | 0.00 |
| 12.6522.12487      | 12 | 6522    | 12487   | 5966  | 2621   | yes      | BWZt4   | BWZt9  | BWZt13 | BWZt21 | 1.00 | 0.00 |
| 12.13820.18839     | 12 | 13820   | 18839   | 5020  | 2711   | yes      | BWZt4   | BWZt9  | BWZt13 | BWZt21 | 1.00 | 0.00 |
| 12.106740.107675   | 12 | 106740  | 107675  | 936   | 6795   | yes      | BWZt4   | BWZt9  | BWZt13 | BWZt21 | 1.00 | 0.00 |
| 12.462748.462907   | 12 | 462748  | 462907  | 160   | 7669   |          | BWZt4   | BWZt9  | BWZt13 | BWZt21 | 1.00 | 0.00 |
| 12.494199.496373   | 12 | 494199  | 496373  | 2175  | 629    |          | BWZt4   | BWZt9  | BWZt13 | BWZt21 | 1.00 | 0.04 |
| 12.607359.608250   | 12 | 607359  | 608250  | 892   | 8532   | yes      | BWZt4   | BWZt9  | BWZt13 | BWZt21 | 1.00 | 0.00 |
| 12.681007.681905   | 12 | 681007  | 681905  | 899   | 7690   | yes      | BWZt4   | BWZt9  | BWZt13 | BWZt21 | 1.00 | 0.00 |
| 12.732520.732860   | 12 | 732520  | 732860  | 341   | 7555   |          | BWZt4   | BWZt9  | BWZt13 | BWZt21 | 1.00 | 0.00 |
| 12.778427.778715   | 12 | 778427  | 778715  | 289   | 26900  |          | BWZt4   | BWZt9  | BWZt13 | BWZt21 | 1.00 | 0.00 |
| 12.832633.835493   | 12 | 832633  | 835493  | 2861  | 498    |          | BWZt4   | BWZt9  | BWZt13 | BWZt21 | 1.00 | 0.02 |
| 12.870648.871567   | 12 | 870648  | 871567  | 920   | 4231   |          | BWZt4   | BWZt9  | BWZt13 | BWZt21 | 1.00 | 0.00 |
| 12.1012309.1012492 | 12 | 1012309 | 1012492 | 184   | 4578   |          | BWZt9   | BWZt13 | BWZt21 | BWZt21 | 1.00 | 0.00 |
| 12.1121157.1124000 | 12 | 1121157 | 1124000 | 2844  | 1213   |          | BWZt9   | BWZt13 | BWZt21 | BWZt21 | 1.00 | 0.00 |
| 12.1402101.1405654 | 12 | 1402101 | 1405654 | 3554  | 303    |          | BWZt9   | BWZt13 | BWZt21 | BWZt21 | 1.00 | 0.02 |
| 12.1427223.1442420 | 12 | 1427223 | 1442420 | 15198 | 12800  | yes      | BWZt9   | BWZt13 | BWZt21 | BWZt21 | 1.00 | 0.00 |
| 12.1442499.1445629 | 12 | 1442499 | 1445629 | 3131  | 2138   | yes      | BWZt9   | BWZt13 | BWZt21 | BWZt21 | 1.00 | 0.00 |
| 13.3888.6772       | 13 | 3888    | 6772    | 2885  | 615    | yes      | BWZt4   | BWZt9  | BWZt13 | BWZt21 | 1.00 | 0.01 |
| 13.6864.9270       | 13 | 6864    | 9270    | 2407  | 580    | yes      | BWZt4   | BWZt9  | BWZt13 | BWZt21 | 1.00 | 0.03 |
| 13.12950.15733     | 13 | 12950   | 15733   | 2784  | 343    |          | BWZt4   | BWZt9  | BWZt13 | BWZt21 | 1.00 | 0.00 |
| 13.17800.20460     | 13 | 17800   | 20460   | 2661  | 581    | yes      | BWZt4   | BWZt9  | BWZt13 | BWZt21 | 1.00 | 0.00 |
| 13.93164.93950     | 13 | 93164   | 93950   | 787   | 7338   | yes      | BWZt4   | BWZt9  | BWZt13 | BWZt21 | 1.00 | 0.00 |
| 13.183698.187962   | 13 | 183698  | 187962  | 4265  | 18100  | yes      | BWZt4   | BWZt9  | BWZt13 | BWZt21 | 1.00 | 0.00 |
| 13.320524.320760   | 13 | 320524  | 320760  | 237   | 1620   | yes      | BWZt4   | BWZt9  | BWZt13 | BWZt21 | 1.00 | 0.03 |
| 13.442993.443802   | 13 | 442993  | 443802  | 810   | 2419   | yes      | BWZt4   | BWZt9  | BWZt13 | BWZt21 | 1.00 | 0.01 |
| 13.479338.479478   | 13 | 479338  | 479478  | 141   | 651000 | 5S rRNA  | BWZt4   | BWZt9  | BWZt13 | BWZt21 | 1.00 | 0.00 |
| 13.645590.645871   | 13 | 645590  | 645871  | 282   | 651000 | 5S rRNA  | BWZt4   | BWZt9  | BWZt13 | BWZt21 | 1.00 | 0.00 |
| 13.775785.776744   | 13 | 775785  | 776744  | 960   | 7477   | yes      | BWZt4   | BWZt9  | BWZt13 | BWZt21 | 1.00 | 0.00 |
| 13.846733.850190   | 13 | 846733  | 850190  | 3458  | 738    |          | BWZt4   | BWZt9  | BWZt13 | BWZt21 | 1.00 | 0.01 |
| 13.910888.911312   | 13 | 910888  | 911312  | 425   | 6533   | yes      | BWZt4   | BWZt9  | BWZt13 | BWZt21 | 1.00 | 0.00 |
| 13.951679.951897   | 13 | 951679  | 951897  | 219   | 960    |          | BWZt4   | BWZt9  | BWZt13 | BWZt21 | 1.00 | 0.00 |
| 13.1030685.1031551 | 13 | 1030685 | 1031551 | 867   | 6198   | yes      | BWZt4   | BWZt9  | BWZt13 | BWZt21 | 1.00 | 0.00 |
| 13.1163358.1164368 | 13 | 1163358 | 1164368 | 1011  | 7628   | yes      | BWZt4   | BWZt9  | BWZt13 | BWZt21 | 1.00 | 0.00 |
| 13.1168422.1177165 | 13 | 1168422 | 1177165 | 8744  | 4812   | yes      | BWZt4   | BWZt9  | BWZt13 | BWZt21 | 1.00 | 0.00 |
| 13.1177242.1180173 | 13 | 1177242 | 1180173 | 2932  | 556    | yes      | BWZt4</ |        |        |        |      |      |

|                  |    |        |        |       |       |     |        |        |        |        |      |      |
|------------------|----|--------|--------|-------|-------|-----|--------|--------|--------|--------|------|------|
| 15.597420.601006 | 15 | 597420 | 601006 | 3587  | 2454  | yes |        | BWZt19 | BWZt13 | BWZt21 | 1.00 | 0.00 |
| 15.601708.639500 | 15 | 601708 | 639500 | 37793 | 44900 | yes | BWZt14 | BWZt19 | BWZt13 | BWZt21 | 0.97 | 0.00 |
| 16.2.25177       | 16 | 2      | 25177  | 25176 | 29200 | yes | BWZt14 | BWZt19 | BWZt13 | BWZt21 | 1.00 | 0.00 |
| 16.26979.31598   | 16 | 26979  | 31598  | 4620  | 1045  |     |        | BWZt19 | BWZt13 | BWZt21 | 1.00 | 0.00 |
| 16.36395.40088   | 16 | 36395  | 40088  | 3694  | 1016  | yes |        | BWZt19 | BWZt13 | BWZt21 | 1.00 | 0.00 |
| 16.84151.85006   | 16 | 84151  | 85006  | 856   | 6833  | yes |        | BWZt19 | BWZt13 | BWZt21 | 1.00 | 0.00 |
| 16.89218.90204   | 16 | 89218  | 90204  | 987   | 7976  | yes | BWZt14 | BWZt19 | BWZt13 | BWZt21 | 1.00 | 0.00 |
| 16.412864.413679 | 16 | 412864 | 413679 | 816   | 8179  | yes | BWZt14 | BWZt19 | BWZt13 | BWZt21 | 1.00 | 0.00 |
| 16.420030.421422 | 16 | 420030 | 421422 | 1393  | 4996  | yes | BWZt14 | BWZt19 | BWZt13 | BWZt21 | 1.00 | 0.00 |
| 16.429283.430197 | 16 | 429283 | 430197 | 915   | 5759  | yes |        | BWZt19 | BWZt13 | BWZt21 | 1.00 | 0.00 |
| 16.578572.583821 | 16 | 578572 | 583821 | 5250  | 4864  | yes |        | BWZt19 | BWZt13 | BWZt21 | 1.00 | 0.00 |
| 16.597962.607044 | 16 | 597962 | 607044 | 9083  | 11000 | yes | BWZt14 | BWZt19 | BWZt13 | BWZt21 | 1.00 | 0.00 |
| 17.20145.23364   | 17 | 20145  | 23364  | 3220  | 12500 | yes | BWZt14 | BWZt19 | BWZt13 | BWZt21 | 1.00 | 0.00 |
| 17.23479.32114   | 17 | 23479  | 32114  | 8636  | 7584  | yes |        | BWZt19 | BWZt13 | BWZt21 | 1.00 | 0.00 |
| 17.32194.70869   | 17 | 32194  | 70869  | 38676 | 34800 | yes | BWZt14 | BWZt19 | BWZt13 | BWZt21 | 1.00 | 0.00 |
| 17.79759.81052   | 17 | 79759  | 81052  | 1294  | 6345  | yes | BWZt14 | BWZt19 | BWZt13 | BWZt21 | 1.00 | 0.00 |
| 17.561480.566789 | 17 | 561480 | 566789 | 5310  | 4601  | yes |        | BWZt19 | BWZt13 | BWZt21 | 1.00 | 0.00 |
| 17.566841.583652 | 17 | 566841 | 583652 | 16812 | 17100 | yes | BWZt14 | BWZt19 | BWZt13 | BWZt21 | 1.00 | 0.00 |
| 18.8453.9307     | 18 | 8453   | 9307   | 855   | 7409  | yes | BWZt14 | BWZt19 | BWZt13 | BWZt21 | 1.00 | 0.00 |
| 18.85060.85835   | 18 | 85060  | 85835  | 776   | 7423  | yes | BWZt14 | BWZt19 | BWZt13 | BWZt21 | 1.00 | 0.00 |
| 18.94463.94734   | 18 | 94463  | 94734  | 272   | 4169  | yes | BWZt14 | BWZt19 | BWZt13 | BWZt21 | 1.00 | 0.00 |
| 18.112235.113035 | 18 | 112235 | 113035 | 801   | 6393  | yes | BWZt14 | BWZt19 | BWZt13 | BWZt21 | 1.00 | 0.00 |
| 18.237222.238251 | 18 | 237222 | 238251 | 1030  | 8647  | yes | BWZt14 | BWZt19 | BWZt13 | BWZt21 | 1.00 | 0.00 |
| 18.287412.292428 | 18 | 287412 | 292428 | 5017  | 783   | yes |        | BWZt19 | BWZt13 | BWZt21 | 1.00 | 0.01 |
| 18.431645.432912 | 18 | 431645 | 432912 | 1268  | 7542  | yes | BWZt14 | BWZt19 | BWZt13 | BWZt21 | 1.00 | 0.00 |
| 18.536203.544521 | 18 | 536203 | 544521 | 8319  | 5487  | yes |        | BWZt19 | BWZt13 | BWZt21 | 1.00 | 0.00 |
| 18.544573.545584 | 18 | 544573 | 545584 | 1012  | 4816  | yes |        | BWZt19 | BWZt13 | BWZt21 | 1.00 | 0.00 |
| 19.2210.3581     | 19 | 2210   | 3581   | 1372  | 645   | yes |        | BWZt19 | BWZt13 | BWZt21 | 1.00 | 0.01 |
| 19.3645.8939     | 19 | 3645   | 8939   | 5295  | 9526  | yes | BWZt14 | BWZt19 | BWZt13 | BWZt21 | 1.00 | 0.00 |
| 19.104217.104960 | 19 | 104217 | 104960 | 744   | 7287  | yes | BWZt14 | BWZt19 | BWZt13 | BWZt21 | 1.00 | 0.00 |
| 19.527513.527919 | 19 | 527513 | 527919 | 407   | 6989  | yes | BWZt14 | BWZt19 | BWZt13 | BWZt21 | 1.00 | 0.00 |
| 20.1166.4761     | 20 | 1166   | 4761   | 3596  | 2395  | yes |        | BWZt19 | BWZt13 | BWZt21 | 1.00 | 0.00 |
| 20.5781.9528     | 20 | 5781   | 9528   | 3748  | 1156  | yes |        | BWZt19 | BWZt13 | BWZt21 | 1.00 | 0.00 |
| 20.230607.231363 | 20 | 230607 | 231363 | 757   | 6902  | yes | BWZt14 | BWZt19 | BWZt13 | BWZt21 | 1.00 | 0.00 |
| 20.297635.298058 | 20 | 297635 | 298058 | 424   | 620   | yes |        |        |        | BWZt21 | 1.00 | 0.02 |
| 20.453037.466416 | 20 | 453037 | 466416 | 13380 | 13900 | yes |        | BWZt19 | BWZt13 | BWZt21 | 1.00 | 0.00 |
| 20.467436.471636 | 20 | 467436 | 471636 | 4201  | 2520  | yes |        | BWZt19 | BWZt13 | BWZt21 | 1.00 | 0.00 |
| 21.2.26958       | 21 | 2      | 26958  | 26957 | 32800 | yes | BWZt14 | BWZt19 | BWZt13 | BWZt21 | 0.99 | 0.00 |
| 21.27372.40407   | 21 | 27372  | 40407  | 13036 | 13000 | yes |        | BWZt19 | BWZt13 | BWZt21 | 1.00 | 0.00 |
| 21.40468.43135   | 21 | 40468  | 43135  | 2668  | 2069  | yes |        | BWZt19 | BWZt13 | BWZt21 | 1.00 | 0.00 |
| 21.43194.45416   | 21 | 43194  | 45416  | 2223  | 3362  | yes |        | BWZt19 | BWZt13 | BWZt21 | 1.00 | 0.00 |
| 21.227542.233177 | 21 | 227542 | 233177 | 5636  | 5514  | yes |        | BWZt19 | BWZt13 | BWZt21 | 1.00 | 0.00 |
| 21.349300.352594 | 21 | 349300 | 352594 | 3295  | 1062  |     |        |        | BWZt13 | BWZt21 | 1.00 | 0.00 |
| 21.400171.401658 | 21 | 400171 | 401658 | 1488  | 959   | yes | BWZt14 | BWZt19 | BWZt13 | BWZt21 | 1.00 | 0.00 |
| 21.401722.409211 | 21 | 401722 | 409211 | 7490  | 3487  | yes |        | BWZt19 | BWZt13 | BWZt21 | 1.00 | 0.00 |

† The difference of the maximum posterior probability between the fungus containing samples (infected wheat and in vitro culture) and the fungus free samples (mock-inoculated healthy wheat)

‡ Minimum sRNA loci differential expression false discovery rate (FDR) in at least one comparison between the infected wheat samples and the corresponding mock samples

**Table S5.** Chromosomal distribution of *Zymoseptoria tritici* IPO323 sRNA loci and their activity (inferred from the sRNAseq data).

| chromosome | chromosome length (nt) | number of sRNA loci <sup>‡</sup> | total length of sRNA loci (nt) | total sRNA counts from all loci | % chromosome occupied by sRNA loci | counts/1kb genomic DNA | counts/1kb sRNA loci |
|------------|------------------------|----------------------------------|--------------------------------|---------------------------------|------------------------------------|------------------------|----------------------|
| 1          | 6,088,797              | 45                               | 152,153                        | 218,325                         | 2.5                                | 36                     | 1,435                |
| 2          | 3,860,111              | 33                               | 63,921                         | 163,311                         | 1.7                                | 42                     | 2,555                |
| 3          | 3,505,381              | 26                               | 64,904                         | 93,428                          | 1.9                                | 27                     | 1,439                |
| 4          | 2,880,011              | 17                               | 30,210                         | 75,864                          | 1.0                                | 26                     | 2,511                |
| 5          | 2,861,803              | 23                               | 77,336                         | 132,706                         | 2.7                                | 46                     | 1,716                |
| 6          | 2,674,951              | 16                               | 52,120                         | 97,057                          | 1.9                                | 36                     | 1,862                |
| 7          | 2,665,280              | 23                               | 39,548                         | 124,074                         | 1.5                                | 47                     | 3,137                |
| 8          | 2,443,572              | 33                               | 54,915                         | 160,215                         | 2.2                                | 66                     | 2,918                |
| 9          | 2,142,475              | 21                               | 44,564                         | 152,016                         | 2.1                                | 71                     | 3,411                |
| 10         | 1,682,575              | 8                                | 18,496                         | 24,477                          | 1.1                                | 15                     | 1,323                |
| 11         | 1,624,292              | 10                               | 9,658                          | 43,883                          | 0.6                                | 27                     | 4,544                |
| 12         | 1,462,624              | 17                               | 49,909                         | 99,351                          | 3.4                                | 68                     | 1,991                |
| 13         | 1,185,774              | 17                               | 39,889                         | 69,581                          | 3.4                                | 59                     | 1,744                |
| 14         | 773,098                | 13                               | 44,520                         | 94,038                          | 5.8                                | 122                    | 2,112                |
| 15         | 639,501                | 11                               | 80,153                         | 111,246                         | 12.5                               | 174                    | 1,388                |
| 16         | 607,044                | 10                               | 52,790                         | 80,868                          | 8.7                                | 133                    | 1,532                |
| 17         | 584,099                | 5                                | 35,272                         | 48,130                          | 6.0                                | 82                     | 1,365                |
| 18         | 573,698                | 9                                | 19,350                         | 52,669                          | 3.4                                | 92                     | 2,722                |
| 19         | 549,847                | 4                                | 7,818                          | 24,447                          | 1.4                                | 44                     | 3,127                |
| 20         | 472,105                | 6                                | 26,106                         | 27,493                          | 5.5                                | 58                     | 1,053                |
| 21         | 409,213                | 8                                | 62,793                         | 62,253                          | 15.3                               | 152                    | 991                  |

Accessory chromosomes are shown in blue font.

<sup>‡</sup>34 siRNA loci that overlap with tRNA, rRNA, snRNA, and snoRNA genes (see Table S4) were excluded from the analyses presented in this table



**Table S6.** *Zymoseptoria tritici* IPO323 sRNA loci and mature sRNAs predicted to target wheat transcripts.

**A. sRNA loci generating mature sRNAs, which have predicted mRNAs targets in wheat**

1.168753-169514  
1.2-24760  
1.24832-33907  
1.2630102-2631752  
1.3107284-3109571  
1.3404853-3405015  
1.4420671-4420786  
1.4519579-4520495  
1.4859784-4862055  
1.5208279-5209283  
1.52723-55652  
1.55724-59340  
1.5574650-5575522  
1.59399-69532  
1.6022523-6024517  
1.6024577-6027831  
1.6042189-6044283  
1.6044579-6052106  
1.6052501-6055814  
1.6060199-6062484  
1.6062562-6077812  
1.6077865-6084551  
1.610884-611019  
1.681033-681226  
1.912518-913393  
1.952268-954112  
2.1061972-1062929  
2.1295279-1297239  
2.1333569-1334006  
2.1741314-1742939  
2.1895220-1896101  
2.1903263-1903455  
2.1909278-1910404  
2.236665-237674  
2.3187737-3188483  
2.3189040-3189775  
2.3276658-3277710  
2.3411312-3412084  
2.341988-345005  
2.3632877-3633814  
2.3801864-3816890  
2.3816969-3821391  
2.3839620-3844042  
2.400134-400399  
2.47729-49709  
2.532319-532572  
2.819512-820307  
3.1178-7084  
3.1848836-1849733  
3.2252943-2253304  
3.2375162-2376724  
3.2736368-2736981  
3.2779587-2780080  
3.3241153-3242334  
3.3403412-3404238  
3.387886-388363  
3.391037-392727  
3.401660-407274  
3.587789-590578  
3.7151-18710  
3.822679-823459  
4.1251113-1252024  
4.170472-171758  
4.2228316-2228727  
4.234947-235725  
4.2644748-2645586  
4.272845-274005  
4.2866934-2868658  
4.2869853-2880010  
5.1045197-1045805  
5.1092560-1092727  
5.181519-182321  
5.1875780-1875912  
5.2318983-2319321  
5.2686132-2687400  
5.2806545-2846948  
5.2850297-2861802  
5.514262-514929  
5.523622-524805  
5.557661-560726  
5.59060-61544  
5.748438-748459  
5.918436-919203  
5.934505-936848  
6.1267883-1270184  
6.16617-39543  
6.173879-174893  
6.2022916-2027069  
6.2108904-2109094  
6.2414949-2415730

6.39611-43211  
6.597638-598424  
6.673455-674376  
6.782298-789507  
6.804863-807140  
6.927640-928434  
6.999529-999949  
7.1263898-1264763  
7.127872-128627  
7.1351801-1352313  
7.179855-180653  
7.1804941-1806212  
7.1814849-1815870  
7.2536483-2537653  
7.2613424-2626681  
7.452408-453395  
7.582594-583749  
7.584106-585040  
7.594685-595531  
7.755129-758077  
7.951736-951950  
8.135097-135842  
8.1402168-1402594  
8.1402809-1403198  
8.1496933-1498574  
8.1778342-1779282  
8.1779347-1780499  
8.1816353-1818241  
8.1826676-1828336  
8.1839987-1840797  
8.1964648-1966838  
8.2000570-2000759  
8.2011199-2012128  
8.2142675-2143478  
8.2202983-2203732  
8.2292152-2298576  
8.2378470-2380599  
8.2403753-2409329  
8.2431279-2439751  
8.420489-421629  
8.558236-559373  
8.564251-565700  
9.1413289-1414068  
9.1417709-1418662  
9.1426458-1427268  
9.1433239-1434246  
9.170649-171598  
9.1904100-1904911  
9.1963691-1964465  
9.1998601-1999461  
9.2-19666  
9.2127241-2137629  
9.282960-283771  
9.403302-404358  
9.406820-407637  
9.64052-64887  
9.66682-67503  
9.972252-973061  
10.1407605-1408991  
10.1638022-1644097  
10.445195-445392  
10.797801-797951  
11.1119359-1119964  
11.1593332-1594253  
11.1597670-1598473  
11.1615364-1617483  
11.32325-33623  
11.36845-38682  
11.760814-761682  
11.768223-768327  
11.984387-985163  
12.1012309-1012492  
12.106740-107675  
12.1427223-1442420  
12.1442499-1445629  
12.607359-608250  
12.6522-12487  
12.681007-681905  
13.1030685-1031551  
13.1163358-1164368  
13.1168422-1177165  
13.1180236-1184672  
13.183698-187962  
13.479338-479478  
13.645590-645871  
13.775785-776744  
13.910888-911312  
13.93164-93950  
13.951679-951897  
14.1-5659  
14.280035-280949  
14.294633-295658  
14.32035-35785  
14.532521-533209

14.5736-29448  
14.632345-633222  
14.712306-713157  
14.744382-745201  
14.769927-771285  
15.14826-24490  
15.166892-167796  
15.2-14750  
15.25780-26891  
15.325288-325837  
15.44255-45101  
15.51821-52932  
15.583955-585999  
15.589581-597368  
15.597420-601006  
15.601708-639500  
16.2-25177  
16.26979-31598  
16.412864-413679  
16.420030-421422  
16.429283-430197  
16.578572-583821  
16.597962-607044  
16.84151-85006  
16.89218-90204  
17.20145-23364  
17.23479-32114  
17.32194-70869  
17.561480-566789  
17.566841-583652  
17.79759-81052  
18.112235-113035  
18.237222-238251  
18.431645-432912  
18.536203-544521  
18.544573-545584  
18.8453-9307  
18.85060-85835  
19.104217-104960  
19.3645-8939  
19.527513-527919  
20.230607-231363  
20.297635-298058  
20.453037-466416  
21.2-26958  
21.227542-233177  
21.27372-40407  
21.401722-409211  
21.40468-43135  
21.43194-45416

#### B. Mature sRNAs predicted to target wheat mRNAs

| Mature sRNA ID | sRNA sequence            |
|----------------|--------------------------|
| ZtsRNA1        | TTGGGGAATCCGTAGTGTGT     |
| ZtsRNA1.1      | GGGGAATCCGTGGTGTGTATG    |
| ZtsRNA2        | TGCACTGGTTGCTCGAACGCT    |
| ZtsRNA3        | TAACCATCTTTGGGGTCTGACT   |
| ZtsRNA3.1      | AACCATCTTTGGGGTCTGACT    |
| ZtsRNA3.2      | GTTAACCATCTTTGGGGTCTGACT |
| ZtsRNA4        | TGGAGATCGCGAAGGAGTTTC    |
| ZtsRNA4.1      | TCCATGGAGATCGCGAAGGAG    |
| ZtsRNA5.1      | TGGCTCAGCTGCTGGCTCTGG    |
| ZtsRNA5.2      | TGGCTCGGCTGCTGGCTCAGC    |
| ZtsRNA6.1      | TAGGATTGCCTCTATAGCCTG    |
| ZtsRNA6.2      | TGGGATTGCCTCTATAGCCTG    |
| ZtsRNA7.1      | TATGTCTCGGGCTCGTCGATA    |
| ZtsRNA7.2      | TGTGTCTCGGGCTCGTCGATA    |
| ZtsRNA8.1      | TTCGCGCTTCCTCTTAACCAT    |
| ZtsRNA8.2      | TTCGCGCTTCCTCTTAACCTAT   |
| ZtsRNA9.1      | TAGTCGTCTCGTCCCAGAACT    |
| ZtsRNA9.2      | TAGTCGTCTCGTCTAGAACT     |
| ZtsRNA10.1     | TAGTATCGTCTTCCGTATCG     |
| ZtsRNA10.2     | TAGTATCGTCTTCCGTGTGCG    |
| ZtsRNA11.1     | TATCTGTTTAACATCTTCATC    |
| ZtsRNA11.2     | TATCTGTTTAACATCTTTATC    |
| ZtsRNA12       | AACACCTGTACGTGGTGCCGGCTA |
| ZtsRNA13.1     | CAGGGAATTTTGGCATACCA     |
| ZtsRNA13.2     | AGGGAATTTTGGCATACCAC     |
| ZtsRNA14.1     | CACCAACGATGTTCTCTTTT     |
| ZtsRNA14.2     | TCACCAACGATGTTCTCTTTT    |
| ZtsRNA15.1     | TGACAGCATCGTCGACAATGG    |
| ZtsRNA15.2     | TTGACAGCATCGTCGACAATG    |
| ZtsRNA16.1     | AAATGATTTAATGAGCCTGACT   |
| ZtsRNA16.2     | AATGATTTAATGAGCCTGACT    |
| ZtsRNA17.1     | TCCGTGCGCCTCAATCACACC    |
| ZtsRNA17.2     | TTCCGTGCGCCTCAATCACAC    |
| ZtsRNA18.1     | TATTGATGCCGGCGAATCGAT    |
| ZtsRNA18.2     | TGATGCCGGCGAATCGATTGG    |
| ZtsRNA19.1     | TACTTCGCTGCAGATCTCCC     |
| ZtsRNA19.2     | TCGCTGCAGATCTCCCGGAG     |
| ZtsRNA20.1     | TCGGTCCACAAAGCTCCAGCC    |

|            |                          |
|------------|--------------------------|
| ZtsRNA20.2 | TGCATCGGTCCACAAAGCTCC    |
| ZtsRNA21.1 | GGGCTTATGGTGCA GTGGTAGC  |
| ZtsRNA21.2 | TTATGGTGCA GTGGTAGCATT   |
| ZtsRNA22.1 | CTTTGGATCGGAGTTGTGGGATGG |
| ZtsRNA22.2 | TTTGATCGGAGTTGTGGGATGGC  |
| ZtsRNA23   | AATACACGTGGCGGGCGCGGT    |
| ZtsRNA24.1 | CCATCTTTTTTTTGTCTGATC    |
| ZtsRNA24.2 | CTTACCATCTTTTTTTGTCTGA   |
| ZtsRNA25   | AATCCGAATCCGACTCTGACGACG |
| ZtsRNA26   | CAATTCTGTCACCTTCTTTTT    |
| ZtsRNA27   | CCCGCAAGATCAGTCCTCTCG    |
| ZtsRNA28   | CGATGAGTAGGACGTAAGTAG    |
| ZtsRNA29   | CTTCCACTCCGACGTCATGT     |
| ZtsRNA30.1 | TATGGAGCGTGCATTCTTTT     |
| ZtsRNA30.2 | TTATGGAGCGTGCATTCTTT     |
| ZtsRNA30.3 | TTATGGAGCGTGCATTCTTTT    |
| ZtsRNA31.1 | TTACGACTTTTCTCTTACCT     |
| ZtsRNA31.2 | TTTACGACTTTTCTCTTACC     |
| ZtsRNA32.1 | TCGAATCCCATCTCTTTCACC    |
| ZtsRNA32.2 | TCGAATCCCATCTCTTTCACCA   |
| ZtsRNA32.3 | TTCGAATCCCATCTCTTTCACCA  |
| ZtsRNA33.1 | CTTCGTGCAAGCACCATGTTTT   |
| ZtsRNA33.2 | CTTCGTGCAAGCACCATGTTTT   |
| ZtsRNA33.3 | TCTTCGTGCAAGCACCATGTT    |
| ZtsRNA34.1 | CACATCAGATTCTGATTCTGGG   |
| ZtsRNA34.2 | CATCACATCAGATTCTGATT     |
| ZtsRNA34.3 | TCATCACATCAGATTCTGATT    |
| ZtsRNA35.1 | TCCGGCTCCTCTGATTCTGCG    |
| ZtsRNA35.2 | TGTCCGGCTCCTCTGATTCTGT   |
| ZtsRNA36.1 | CGGAATTTTTGATGCCCTTCA    |
| ZtsRNA36.2 | CGTGTAGGCGGAATTTTGATGC   |
| ZtsRNA36.3 | GCGGAATTTTGATGCCCTTCA    |
| ZtsRNA37.1 | TACCAATTCGAGCTGCTCTTT    |
| ZtsRNA37.2 | TGCTCTTTGATCTGCTGATAG    |
| ZtsRNA37.3 | TTGAGCTGCTCTTTGATCTG     |
| ZtsRNA38.1 | ACTGCCTCTGGCTGACGCGAA    |
| ZtsRNA38.2 | CGCCAGATTGCACTGCCTCTGGC  |
| ZtsRNA38.3 | TCGCCAGTATTGCACTGCCTCTGG |
| ZtsRNA39.1 | CCTTTGGACTGCTCTACGGAGC   |
| ZtsRNA39.2 | CCTTTGGACTGCTCTACGGAGCC  |
| ZtsRNA39.3 | CTTTGGACTGCTCTACGGAGC    |
| ZtsRNA39.4 | TTTGGACTGCTCTACGGAGCC    |
| ZtsRNA40.1 | ATGGCACTTTCGAAGACTCGG    |
| ZtsRNA40.2 | ATGGCACTTTCGAAGACTCGGC   |
| ZtsRNA40.3 | ATGGCACTTTCGAAGACTCGGCG  |
| ZtsRNA40.4 | ATGGCACTTTCGAAGACTCGGCGA |
| ZtsRNA41.1 | TGGGCGTTGGGCGTTGGTCAG    |
| ZtsRNA41.2 | TGGGCGTTGGTCAGGGTCACC    |
| ZtsRNA41.3 | TTGGGCGTTGGGCGTTGGTCA    |
| ZtsRNA41.4 | TTGGGCGTTGGTCAGGGTCAC    |
| ZtsRNA42.1 | AGAAGGGAAACCAAGACAGTCT   |
| ZtsRNA42.2 | GAAGGGAAACCAAGACAGTCT    |
| ZtsRNA43.1 | TCAGGCAAAGGCTGACGACGA    |
| ZtsRNA43.2 | TTACAGGCAAAGGCTGACGACG   |
| ZtsRNA43.3 | TTACAGGCAAAGGCTGACGACGA  |
| ZtsRNA44.1 | TATCGTCTGTCAGCTTTGCCT    |
| ZtsRNA44.2 | TATCGTCTGTCAGCTTTGCCTG   |
| ZtsRNA45.1 | CCGTCCGATCAGCCATGATAA    |
| ZtsRNA45.2 | CTTCCCGTCCGATCAGCCATG    |
| ZtsRNA45.3 | CTTCCCGTCCGATCAGCCATGA   |
| ZtsRNA45.4 | CTTCCCGTCCGATCAGCCATT    |
| ZtsRNA45.5 | TTCCCGTCCGATCAGCCATGA    |
| ZtsRNA46.1 | TAGGACTGCTATTTCTCTAGG    |
| ZtsRNA46.2 | TATTTCTCTAGGACTGCTATC    |
| ZtsRNA46.3 | TCTTCTAGGACTGCTATCTT     |
| ZtsRNA46.4 | TGCTATTTTCTAGGACTGCT     |
| ZtsRNA46.5 | TGCTATTTTCTAGGACTGCTA    |
| ZtsRNA47.1 | TATCTTACGGGGGATGGTCG     |
| ZtsRNA47.2 | TGGCGACGATATCTTACGGG     |
| ZtsRNA48.1 | AACGACGACGACGACTCTGAA    |
| ZtsRNA48.2 | CAACGACGACGACGACTCTGAA   |
| ZtsRNA49.1 | TACCTCGCGTCTCAAATATC     |
| ZtsRNA49.2 | TTTTGCTCTACCTCGCCGTCT    |
| ZtsRNA50.1 | ACACTAGTACTCAAGTTGGTG    |
| ZtsRNA50.2 | CTAGTACTCAAGTTGGTGACA    |
| ZtsRNA51.1 | AAGTTGGTGACAATTGGGGAAT   |
| ZtsRNA51.2 | AGTTGGTGACAATTGGGGAAT    |
| ZtsRNA51.3 | TCAAGTTGGTGACAATTGGGG    |
| ZtsRNA51.4 | TGACAATTGGGGAATCCGTAG    |
| ZtsRNA51.5 | TGGTGACAATTGGGGAATCCG    |
| ZtsRNA52.1 | TTTGAGACGGCGAGGTAGAGC    |
| ZtsRNA52.2 | TTTGAGACGGCGAGGTAGAAC    |
| ZtsRNA52.3 | TGAGACGGCGAGGTAGAGCAA    |
| ZtsRNA53   | CTTTGACCTCTTCGGAGGCGTGA  |
| ZtsRNA54   | GCACCTTACGCGGTGGCCGTCGT  |
| ZtsRNA55   | GCCCAATCTTCTTGGATGCTGA   |
| ZtsRNA56   | GGACCTTGGCGCAGCGGTAGCGT  |

|           |                         |
|-----------|-------------------------|
| ZtsRNA57  | GGGTAGTTGGTCTAGGGGTAT   |
| ZtsRNA58  | GTGAGTATTACTCTAGTCCGTTA |
| ZtsRNA59  | TAACCACTCGGCCACCTGTCC   |
| ZtsRNA60  | TAACGATTTCCTTTAAGCTCT   |
| ZtsRNA61  | TAACGCGGGCCGACCTTCCG    |
| ZtsRNA62  | TAAGCCACATCTCCATTGTAG   |
| ZtsRNA63  | TAAGGGACGTAGACGAGGTAG   |
| ZtsRNA64  | TAATAGGATAGTATAGAAAGGC  |
| ZtsRNA65  | TACACTACGTCGTCGAGCTCC   |
| ZtsRNA66  | TACACTGCGAACTGCTCTACC   |
| ZtsRNA67  | TACACTGGTCTTTCTTTGAAG   |
| ZtsRNA68  | TACATACGAGGTGTTCTGCTG   |
| ZtsRNA69  | TACCTCTTGGATTGCTGTCT    |
| ZtsRNA70  | TACGGATCTTCTTCTACGAG    |
| ZtsRNA71  | TACTCATCGGACGGAGCCTTT   |
| ZtsRNA72  | TACTTACTCGTCGCTCGTC     |
| ZtsRNA73  | TACTTCCGGACAAAACGCCCT   |
| ZtsRNA74  | TACTTTCAAACTCGATCAATT   |
| ZtsRNA75  | TAGAAGCGATAGAGGAGGACT   |
| ZtsRNA76  | TAGAAGGAATGTCCGTAGATG   |
| ZtsRNA77  | TAGAATCTTTGAAATTAGCTA   |
| ZtsRNA78  | TAGACGCGGAGCTAGAGCTCG   |
| ZtsRNA79  | TAGACTCTGCTGACTAGGCAC   |
| ZtsRNA80  | TAGAGCAAAACCGTGGCTAG    |
| ZtsRNA81  | TAGAGGACGAGGAGGACGAGG   |
| ZtsRNA82  | TAGAGGACGATTCGACGACG    |
| ZtsRNA83  | TAGAGGTAGAGCTAGTAGACA   |
| ZtsRNA84  | TAGCAGCTCTCCGAGATCTCC   |
| ZtsRNA85  | TAGCATTGGGCGAGAAATCCG   |
| ZtsRNA86  | TAGCCACCGGTTTTTGCTCTAC  |
| ZtsRNA87  | TAGCCGGCTGCCCTAGCATC    |
| ZtsRNA88  | TAGCGACCGACACGGACCCCT   |
| ZtsRNA89  | TAGCGCTCGAGGATCTAGATT   |
| ZtsRNA90  | TAGCGGCAAGGTAGGCTAGAA   |
| ZtsRNA91  | TAGCGTGCCTAGCTCTCTATT   |
| ZtsRNA92  | TAGCGTTCTCGGAGGATCTG    |
| ZtsRNA93  | TAGCTCGAGCGGTAACAGACT   |
| ZtsRNA94  | TAGCTCGTCTGTTTTCTAG     |
| ZtsRNA95  | TAGGATGGGGTAATCGACCCG   |
| ZtsRNA96  | TAGGCAAGGACATCGAGACA    |
| ZtsRNA97  | TAGGGACATGCGATTTTCGATT  |
| ZtsRNA98  | TAGGGCATTGCGAGTGAACAG   |
| ZtsRNA99  | TAGGTAAGAAAGAAAAGTCGTA  |
| ZtsRNA100 | TAGGTATCGAACTCGATAATT   |
| ZtsRNA101 | TAGGTCTCTAGAAGCACTTCG   |
| ZtsRNA102 | TAGGTCTGGCCCTCTCTAGC    |
| ZtsRNA103 | TAGTATCCGTCGTCGAGCTCG   |
| ZtsRNA104 | TAGTCGACGAAGTGCTTCCCG   |
| ZtsRNA105 | TAGTCGATCTGTCGTAATCG    |
| ZtsRNA106 | TAGTTAGGGAAGTTCTGCTCT   |
| ZtsRNA107 | TATCATGACTGCTCGTTGCC    |
| ZtsRNA108 | TATCCACTGTATACAACACTC   |
| ZtsRNA109 | TATCGGATCTCGTGAGGTATG   |
| ZtsRNA110 | TATCGGTAGTCTCTCTTTTTG   |
| ZtsRNA111 | TATCGTCGATTCTACAAGCCG   |
| ZtsRNA112 | TATCGTCGCCAACCCCTCGA    |
| ZtsRNA113 | TATCTCTGCGGAGCTGAATG    |
| ZtsRNA114 | TATCTGACTTCACCTGACGAA   |
| ZtsRNA115 | TATGCTCGACGAACGAGTCT    |
| ZtsRNA116 | TATGCTCGGTCGACACCATT    |
| ZtsRNA117 | TATGGCGTGTGACTCAAGCTC   |
| ZtsRNA118 | TCAAAGGCGTCGAGCTGCTG    |
| ZtsRNA119 | TCAAACCGATCGCTTCGCTCC   |
| ZtsRNA120 | TCAACGAGCGTGGATACTTCA   |
| ZtsRNA121 | TCACCTCTGAACCTTTGTGACG  |
| ZtsRNA122 | TCAGAGTCGTGTCAGAGTCG    |
| ZtsRNA123 | TCAGATCAGGTGCAAAGGTAG   |
| ZtsRNA124 | TCCGACGTCCCTCTAGTGCTT   |
| ZtsRNA125 | TCCGGAGCGTGCTTTTACG     |
| ZtsRNA126 | TCCGGATTGCGGCTTCGCTATC  |
| ZtsRNA127 | TCCTCCGTCTCGTCCGCTCG    |
| ZtsRNA128 | TCCTGTAAGCACTGGAGGGACG  |
| ZtsRNA129 | TCGAAGGGATGCTCGTAGAAG   |
| ZtsRNA130 | TCGACCGGTCTATTTCCCTCT   |
| ZtsRNA131 | TCGACTATGTCACTGGCAGCG   |
| ZtsRNA132 | TCGATTCCGGGGTCGACCTCA   |
| ZtsRNA133 | TCGCATTCTCGACCGTCGCA    |
| ZtsRNA134 | TCGCCCCGAGCGGCTCTGACC   |
| ZtsRNA135 | TCGCCCCGTGAAGATATCGTCG  |
| ZtsRNA136 | TCGCTTCGGCTCATCTCCTA    |
| ZtsRNA137 | TCGGACCTTTCCCTTTTCGAG   |
| ZtsRNA138 | TCGGATTGCGGATTCAGAGTCG  |
| ZtsRNA139 | TCGGCTAGAATTCCTCTCTA    |
| ZtsRNA140 | TCGGTAGGACGTTAAAAGGCT   |
| ZtsRNA141 | TCGGTCCGCGTAGAGCTAGCG   |
| ZtsRNA142 | TCGTTACTTCGCCGACCTCTC   |
| ZtsRNA143 | TCTCATGTGTCATGTTAGCT    |

ZtsRNA144 TCTGAACCTCTTCGGGATCC  
 ZtsRNA145 TGAAGGGCCTTGTCGAATACA  
 ZtsRNA146 TGACCAACGACACGAGCTGCT  
 ZtsRNA147 TGACCAGGTCTAACTCCAAC  
 ZtsRNA148 TGACGAAGTCTTAGAGAAAG  
 ZtsRNA149 TGAGACTTGTGAGCGGGCGA  
 ZtsRNA150 TGAGCTGCTCTTCTTTTAC  
 ZtsRNA151 TGATTGTTCCAGAAGATGAGT  
 ZtsRNA152 TGCACGTGTACCATAGCCTG  
 ZtsRNA153 TGCCCGAGCCGCTCTGTAG  
 ZtsRNA154 TGCCGCTGGCGGATTTCTCG  
 ZtsRNA155 TGCGACTGCAAGAGCAATTCG  
 ZtsRNA156 TGCCTGCGACGTAGGAGACG  
 ZtsRNA157 TGCGTGGCGCTTGAGCTTCTGA  
 ZtsRNA158 TGCTGGAGCTTGCAACGAGT  
 ZtsRNA159 TGGACTGCTCTTCTTCTTC  
 ZtsRNA160 TGGCGATGGCGACTGATCTGA  
 ZtsRNA161 TGGCGCACCGCTGAACCTCCC  
 ZtsRNA162 TGGGAGACGTGGTAGCCATCG  
 ZtsRNA163 TGGTCGAGGGGTTGGCGACG  
 ZtsRNA164 TGGTGTGGCTTCATCTGCG  
 ZtsRNA165 TGGTATTGCTGCTGCTGATG  
 ZtsRNA166 TGTCGGTCTTGTCTTAGG  
 ZtsRNA167 TGTCTCGTCTGCTCAAAATG  
 ZtsRNA168 TGTCTTGGTCACCGTCCAGT  
 ZtsRNA169 TGCTTGGTTCCCTCCGAG  
 ZtsRNA170 TGTTGCAACGTAGAGGGCTG  
 ZtsRNA171 TGTTGATCGAGGGCTCATTCC  
 ZtsRNA172 TGTGGCGGCGATATCTCTAC  
 ZtsRNA173 TGTGTGGTGGATCAAAGGCG  
 ZtsRNA174 TGTTTGATCCGACTGTCTTG  
 ZtsRNA175 TTAATATCTCCGAGAACGACA  
 ZtsRNA176 TTACCCCATCTAGCCACCGG  
 ZtsRNA177 TTCCACCTCTTCATCTCCG  
 ZtsRNA178 TTCCAGATCCAGTCTGGAACATC  
 ZtsRNA179 TTCCGCGCAGTACTATGTCT  
 ZtsRNA180 TTCCTCTGCCGCTCTCCTCG  
 ZtsRNA181 TTCTTTTCCGACTGTTCTCG  
 ZtsRNA182 TTCGCCACCTCTGAACGGTG  
 ZtsRNA183 TTCGTGTGCTCGTATTCGTGA  
 ZtsRNA184 TTGCGGTCGACGAATCAGAGG  
 ZtsRNA185 TTGCTACGTGCTGAGCTA  
 ZtsRNA186 TTGATTGAGGTCTGGTGAAT  
 ZtsRNA187 TTGGCGACACGATCTCCTCG  
 ZtsRNA188 TTGTTGCTGTGATCAATGCAC  
 ZtsRNA189 TTTCCAGCCACCTTGCCGCT  
 ZtsRNA190 TTTGAGAAGGATTCGGGCG  
 ZtsRNA191 TTTCTGCTCTGCTAGCTTTCT  
 ZtsRNA192 TTTGCACGTGCTGAACTGA  
 ZtsRNA193 TTTGCCGAGGACTCTCTAAG

C. sRNA loci generating the four mature sRNAs (ZtsRNA1 - ZtsRNA4) selected for an in depth study

| sRNA locus        | Mature sRNA ID | length (nt) | sRNA read counts from all samples | overlaps with protein coding genes | overlaps with other genes | overlaps with TE / repetitive elements | sRNA loci active at 4, 9, 13, or 21 dpi during wheat infection |       |        |        | posterior probability difference† | Min FDR differential expression‡ |
|-------------------|----------------|-------------|-----------------------------------|------------------------------------|---------------------------|----------------------------------------|----------------------------------------------------------------|-------|--------|--------|-----------------------------------|----------------------------------|
| 1.3404853-3405015 | ZtsRNA1        | 163         | 648000                            | -                                  | -                         | -                                      | BWZt4                                                          | BWZt9 | BWZt13 | BWZt21 | 1.00                              | 0.00                             |
| 2.532319-532572   | ZtsRNA1        | 254         | 648000                            | -                                  | -                         | -                                      | BWZt4                                                          | BWZt9 | BWZt13 | BWZt21 | 1.00                              | 0.00                             |
| 2.1903263-1903455 | ZtsRNA1        | 193         | 648000                            | -                                  | -                         | -                                      | BWZt4                                                          | BWZt9 | BWZt13 | BWZt21 | 1.00                              | 0.00                             |
| 3.3241153-3242334 | ZtsRNA1        | 1182        | 651000                            | yes                                | -                         | -                                      | BWZt4                                                          | BWZt9 | BWZt13 | BWZt21 | 1.00                              | 0.00                             |
| 5.514262-514929   | ZtsRNA1        | 668         | 648000                            | yes                                | -                         | -                                      | BWZt4                                                          | BWZt9 | BWZt13 | BWZt21 | 1.00                              | 0.00                             |
| 8.2000570-2000759 | ZtsRNA1        | 190         | 648000                            | -                                  | -                         | -                                      | BWZt4                                                          | BWZt9 | BWZt13 | BWZt21 | 1.00                              | 0.00                             |
| 10.445195-445392  | ZtsRNA1        | 198         | 651000                            | -                                  | -                         | -                                      | BWZt4                                                          | BWZt9 | BWZt13 | BWZt21 | 1.00                              | 0.00                             |
| 13.479338-479478  | ZtsRNA1        | 141         | 651000                            | -                                  | -                         | -                                      | BWZt4                                                          | BWZt9 | BWZt13 | BWZt21 | 1.00                              | 0.00                             |
| 13.645590-645871  | ZtsRNA1        | 282         | 651000                            | -                                  | -                         | -                                      | BWZt4                                                          | BWZt9 | BWZt13 | BWZt21 | 1.00                              | 0.00                             |
| 1.3107284-3109571 | ZtsRNA2        | 2288        | 17700                             | yes                                | -                         | yes                                    | BWZt4                                                          | BWZt9 | BWZt13 | BWZt21 | 1.00                              | 0.00                             |
| 2.341988-345005   | ZtsRNA2        | 3018        | 17800                             | yes                                | -                         | yes                                    | BWZt4                                                          | BWZt9 | BWZt13 | BWZt21 | 1.00                              | 0.00                             |
| 5.557661-560726   | ZtsRNA2        | 3066        | 17900                             | yes                                | -                         | yes                                    | BWZt4                                                          | BWZt9 | BWZt13 | BWZt21 | 1.00                              | 0.00                             |
| 13.183698-187962  | ZtsRNA2        | 4265        | 18100                             | -                                  | -                         | yes                                    | BWZt4                                                          | BWZt9 | BWZt13 | BWZt21 | 1.00                              | 0.00                             |
| 3.2375162-2376724 | ZtsRNA3        | 1563        | 3326                              | yes                                | -                         | -                                      |                                                                |       | BWZt13 |        | 1.00                              | 0.00                             |
| 8.1402809-1403198 | ZtsRNA4        | 390         | 16800                             | -                                  | -                         | -                                      | BWZt4                                                          | BWZt9 | BWZt13 | BWZt21 | 1.00                              | 0.00                             |

**Table S7.** Wheat transcripts predicted to be targeted by *Zymoseptoria tritici* IPO323 mature sRNAs.

| targeted wheat transcript | wheat transcript annotation                                                                             |
|---------------------------|---------------------------------------------------------------------------------------------------------|
| Traes_1AL_0F92F56F8.1     | mitochondrial-processing peptidase subunit, mitochondrial precursor, putative, expressed;0.0;723        |
| Traes_1AL_14F4067BA.1     | cytochrome b6, putative, expressed;4e-31;133                                                            |
| Traes_1AL_1CB3A83EE.1     | IQ calmodulin-binding motif family protein, putative, expressed;0.0;843                                 |
| Traes_1AL_2B919E578.3     | crcB-like protein, expressed;0.0;680                                                                    |
| Traes_1AL_375367151.1     | fatty acid hydroxylase, putative, expressed;4e-144;508                                                  |
| Traes_1AL_486E54C74.1     | expressed protein;0.0;761                                                                               |
| Traes_1AL_4A458DF14.1     | PPR repeat containing protein, expressed;0.0;844                                                        |
| Traes_1AL_6CD69EE7E.1     | cobalt ion transporter, putative, expressed;9e-150;527                                                  |
| Traes_1AL_99F5BB0D8.1     | methyltransferase, putative, expressed;0.0;1089                                                         |
| Traes_1AL_A3B85CAE6.1     | tesmin/TSO1-like CXC domain containing protein, expressed;1e-09;60.8                                    |
| Traes_1AL_ABE93C8E7.1     | peptidyl-tRNA hydrolase, mitochondrial precursor protein, putative, expressed;3e-97;352                 |
| Traes_1AL_B33A889C4.1     | endonuclease/exonuclease/phosphatase family domain containing protein, expressed;0.0;783                |
| Traes_1AL_C4650CF30.3     | selT-like protein precursor, putative, expressed;6e-65;243                                              |
| Traes_1AL_C2C38EEF3.1     | NAD dependent epimerase/dehydratase family protein, putative, expressed;0.0;737                         |
| Traes_1AL_D1E192C9C.2     | leucine-rich repeat family protein, putative, expressed;0.0;711                                         |
| Traes_1AL_D74509506.2     | ternary complex factor MIP1, putative, expressed;0.0;757                                                |
| Traes_1AL_E7F4CC5A1.1     | zinc finger, C3HC4 type domain containing protein, expressed;6e-121;431                                 |
| Traes_1AL_EB5141D4C.7     | NBS-LRR disease resistance protein, putative, expressed;0.0;667                                         |
| Traes_1AS_AC509D7F5.1     | protein kinase APK1A, chloroplast precursor, putative, expressed;5e-171;598                             |
| Traes_1AS_B3DDADFFA.1     | AGC_PVPK_like_kin82y.12 - ACG kinases include homologs to PKA, PKG and PKC, expressed;0.0;653           |
| Traes_1AS_D2C38EEF3.1     | nuclear factor related to kappa-B-binding protein, related, putative, expressed;0.0;1539                |
| Traes_1AS_EB5297361.1     | white-brown complex homolog protein 12, putative, expressed;0.0;996                                     |
| Traes_1BL_0EABC6DF5.1     | expressed protein;0.0;929                                                                               |
| Traes_1BL_190920E1E.1     | glucose-1-phosphate adenyltransferase large subunit, chloroplast precursor, putative, expressed;0.0;860 |
| Traes_1BL_29B4E633D.1     | IQ calmodulin-binding motif family protein, putative, expressed;0.0;829                                 |
| Traes_1BL_39AE9ED1C.1     | SAM dependent carboxyl methyltransferase, putative, expressed;1e-111;400                                |
| Traes_1BL_3EEA722DF.1     | ZOS5-12 - C2H2 zinc finger protein, expressed;6e-36;149                                                 |
| Traes_1BL_42C7AFEA.2      | OsFBX53 - F-box domain containing protein, expressed;3e-110;396                                         |
| Traes_1BL_44DACABDA.1     | expressed protein;0.0;634                                                                               |
| Traes_1BL_4B54A24F9.1     | n/a                                                                                                     |
| Traes_1BL_6ABEEF6DC.1     | peptidyl-tRNA hydrolase, mitochondrial precursor protein, putative, expressed;8e-82;300                 |
| Traes_1BL_7175F3833.1     | zinc finger, C3HC4 type domain containing protein, expressed;2e-129;460                                 |
| Traes_1BL_73EBB04B5.2     | glycosyl hydrolase, family 31, putative, expressed;0.0;795                                              |
| Traes_1BL_84EEAC5D5.4     | mitochondrial-processing peptidase subunit, mitochondrial precursor, putative, expressed;4e-133;472     |
| Traes_1BL_9046B5730.2     | cytoplasmic membrane protein, putative, expressed;5e-33;137                                             |
| Traes_1BL_93285025D.1     | lipoxygenase, putative, expressed;2e-85;315                                                             |
| Traes_1BL_A0644DA53.1     | ternary complex factor MIP1, putative, expressed;4e-128;455                                             |
| Traes_1BL_B722F2F54.1     | Leucine Rich Repeat family protein, expressed;1e-177;620                                                |
| Traes_1BL_BEB9B5EF3.1     | myosin-2 heavy chain, non muscle, putative, expressed;0.0;749                                           |
| Traes_1BL_C943EF0D8.2     | selT-like protein precursor, putative, expressed;3e-65;244                                              |
| Traes_1BL_DF929E48F.1     | crcB-like protein, expressed;0.0;681                                                                    |
| Traes_1BL_E9106179C.2     | AGC_PVPK_like_kin82y.12 - ACG kinases include homologs to PKA, PKG and PKC, expressed;8e-63;239         |
| Traes_1BL_EABF29D66.1     | OsSub7 - Putative Subtilisin homologue, expressed;2e-67;252                                             |
| Traes_1BL_EC9A57F9E.1     | endonuclease/exonuclease/phosphatase family domain containing protein, expressed;0.0;780                |
| Traes_1BL_FDCE71D9E.1     | zinc finger, C3HC4 type domain containing protein, expressed;2e-73;274                                  |
| Traes_1BS_307AF1E47.1     | peroxidase precursor, putative, expressed;4e-64;242                                                     |
| Traes_1BS_3D04F8758.1     | receptor-like protein kinase 2 precursor, putative, expressed;0.0;1704                                  |
| Traes_1BS_4A63D1DBC.2     | phosphatidate cytidyltransferase, putative, expressed;0.0;700                                           |
| Traes_1BS_6799B4072.1     | cytochrome b6, putative, expressed;2e-25;114                                                            |
| Traes_1BS_77D2B4C0D.2     | haloacid dehalogenase-like hydrolase family protein, putative, expressed;3e-165;578                     |
| Traes_1BS_ACC0652C7.1     | transmembrane amino acid transporter protein, putative, expressed;0.0;785                               |
| Traes_1BS_B64557385.1     | disease resistance protein RGA1, putative, expressed;0.0;691                                            |
| Traes_1BS_B734EDEA7.1     | metal cation transporter, putative, expressed;7e-132;468                                                |
| Traes_1BS_DB050544B.1     | KIP1, putative, expressed;9e-180;629                                                                    |
| Traes_1BS_FEE01077D.1     | expressed protein;3e-21;99.0                                                                            |
| Traes_1DL_14F4067BA.1     | cytochrome b6, putative, expressed;4e-31;133                                                            |
| Traes_1DL_1F7D352CA.1     | NAD dependent epimerase/dehydratase family protein, putative, expressed;0.0;737                         |
| Traes_1DL_23506ECCE.2     | IQ calmodulin-binding motif family protein, putative, expressed;0.0;843                                 |
| Traes_1DL_4518A1BF6.1     | peptidyl-tRNA hydrolase, mitochondrial precursor protein, putative, expressed;3e-86;315                 |
| Traes_1DL_4CFBFAC6C.1     | flavonol synthase/flavanone 3-hydroxylase, putative, expressed;2e-53;206                                |
| Traes_1DL_560607990.1     | DUF630/DUF632 domains containing protein, putative, expressed;0.0;744                                   |

|                        |                                                                                                     |
|------------------------|-----------------------------------------------------------------------------------------------------|
| Traes_1DL_580C04A3D.1  | transporter family protein, putative, expressed;2e-142;502                                          |
| Traes_1DL_5AD65B0D4.1  | crcB-like protein, expressed;0.0;680                                                                |
| Traes_1DL_668C082D7.1  | Leucine Rich Repeat family protein, expressed;0.0;1344                                              |
| Traes_1DL_7DDE52966.1  | tesmin/TSO1-like CXC domain containing protein, expressed;5e-08;55.8                                |
| Traes_1DL_808AF52AC.2  | OsFBX53 - F-box domain containing protein, expressed;4e-110;396                                     |
| Traes_1DL_81BFD05931.4 | expressed protein;0.0;921                                                                           |
| Traes_1DL_8EC90B950.1  | seIT-like protein precursor, putative, expressed;9e-67;249                                          |
| Traes_1DL_91D91B69A.1  | mitochondrial-processing peptidase subunit, mitochondrial precursor, putative, expressed;0.0;728    |
| Traes_1DL_97C3D29AF.3  | NBS-LRR disease resistance protein, putative, expressed;0.0;749                                     |
| Traes_1DL_C06754AD1.1  | zinc finger, C3HC4 type domain containing protein, expressed;4e-174;608                             |
| Traes_1DL_D2F45A44E.1  | zinc finger, C3HC4 type domain containing protein, expressed;2e-130;462                             |
| Traes_1DL_ED171DA70.2  | endonuclease/exonuclease/phosphatase family domain containing protein, expressed;0.0;778            |
| Traes_1DL_F4B23A668.1  | ternary complex factor MIP1, putative, expressed;0.0;703                                            |
| Traes_1DS_14F4067BA.1  | cytochrome b6, putative, expressed;4e-31;133                                                        |
| Traes_1DS_1571BA3C8.1  | haloacid dehalogenase-like hydrolase family protein, putative, expressed;3e-165;578                 |
| Traes_1DS_475F92381.7  | AGC_PVPK_like_kin82y.12 - ACG kinases include homologs to PKA, PKG and PKC, expressed;0.0;641       |
| Traes_1DS_550739F69.2  | expressed protein;4e-44;176                                                                         |
| Traes_1DS_77D05F27F.1  | phosphatidate cytidylyltransferase, putative, expressed;3e-121;432                                  |
| Traes_1DS_791028249.1  | expressed protein;5e-59;224                                                                         |
| Traes_1DS_A6A528A3B.1  | expressed protein;3e-56;216                                                                         |
| Traes_1DS_D49FED82C.1  | expressed protein;9e-101;363                                                                        |
| Traes_2AL_091681562.2  | pentatricopeptide, putative, expressed;0.0;1063                                                     |
| Traes_2AL_09879131A.1  | plastid-specific 30S ribosomal protein 3, chloroplast precursor, putative, expressed;9e-50;194      |
| Traes_2AL_0B9E1F386.1  | WD domain, G-beta repeat domain containing protein, expressed;0.0;1563                              |
| Traes_2AL_1A638BE5E.1  | L-ascorbate oxidase homolog precursor, putative, expressed;0.0;609                                  |
| Traes_2AL_295E0C7C5.1  | RNA-binding region RNP-1, putative, expressed;1e-111;402                                            |
| Traes_2AL_2ABB28A56.1  | RNA recognition motif containing protein, putative, expressed;0.0;714                               |
| Traes_2AL_2B32DB242.1  | AIR9 protein, putative, expressed;0.0;727                                                           |
| Traes_2AL_2F1EBA9A5.1  | RNA recognition motif containing protein, putative, expressed;5e-81;299                             |
| Traes_2AL_3035352F3.1  | ZOS7-01 - C2H2 zinc finger protein, expressed;2e-29;127                                             |
| Traes_2AL_34786C78C.1  | inactive receptor kinase At1g27190 precursor, putative, expressed;1e-76;283                         |
| Traes_2AL_3E18AC376.1  | expressed protein;1e-40;163                                                                         |
| Traes_2AL_3E18AC3761.1 | expressed protein;1e-40;163                                                                         |
| Traes_2AL_3E1961FE8.1  | cytochrome P450, putative, expressed;0.0;729                                                        |
| Traes_2AL_42E1AD58D.2  | PPR repeat domain containing protein, putative, expressed;5e-118;423                                |
| Traes_2AL_57BF37A86.1  | no apical meristem protein, putative, expressed;2e-119;427                                          |
| Traes_2AL_5B6D378D4.1  | expressed protein;2e-119;427                                                                        |
| Traes_2AL_78B25BEC4.1  | phosphatidylinositol-4-phosphate 5-kinase, putative, expressed;0.0;961                              |
| Traes_2AL_78EFC67B.1   | cytochrome P450, putative, expressed;4e-43;171                                                      |
| Traes_2AL_84DE2C67B.2  | RNA recognition motif containing protein, putative, expressed;0.0;714                               |
| Traes_2AL_895F81BEB.2  | potassium transporter, putative, expressed;7e-148;521                                               |
| Traes_2AL_8F6A456B3.1  | cytochrome P450, putative, expressed;0.0;782                                                        |
| Traes_2AL_90DC433FE.1  | expressed protein;2e-65;246                                                                         |
| Traes_2AL_A377FF6FE.1  | TKL_IRAK_CR4L.3 - The CR4L subfamily has homology with Crinkly4, expressed;0.0;798                  |
| Traes_2AL_AA82F1ACF.2  | calcium-transporting ATPase, plasma membrane-type, putative, expressed;3e-125;446                   |
| Traes_2AL_B5DE57D18.1  | MYB family transcription factor, putative, expressed;2e-19;91.7                                     |
| Traes_2AL_B7F30A338.1  | histone H1, putative, expressed;4e-26;115                                                           |
| Traes_2AL_BFB0C6D4C.1  | homeobox associated leucine zipper, putative, expressed;3e-50;195                                   |
| Traes_2AL_CCE1B7CA8.2  | transposon protein, putative, Mutator sub-class, expressed;8e-150;528                               |
| Traes_2AL_DFB829624.2  | peptide transporter PTR2, putative, expressed;0.0;670                                               |
| Traes_2AL_F24D031AA.1  | AP2 domain containing protein, expressed;5e-69;258                                                  |
| Traes_2AL_F5D77DFC3.1  | cytochrome b6, putative, expressed;1e-07;52.8                                                       |
| Traes_2AS_06B305ADA.1  | zeta-carotene desaturase, chloroplast/chromoplast precursor, putative, expressed;0.0;1011           |
| Traes_2AS_1437F6A1B.1  | amidase, putative, expressed;0.0;668                                                                |
| Traes_2AS_14F4067BA.1  | cytochrome b6, putative, expressed;4e-31;133                                                        |
| Traes_2AS_205BC3596.1  | expressed protein;1e-63;241                                                                         |
| Traes_2AS_20F68A948.1  | expressed protein;6e-137;485                                                                        |
| Traes_2AS_3B248893C.2  | expressed protein;8e-100;360                                                                        |
| Traes_2AS_42E368404.1  | IQ calmodulin-binding motif family protein, expressed;0.0;639                                       |
| Traes_2AS_447395A66.1  | expressed protein;7e-26;113                                                                         |
| Traes_2AS_4DE6446BD.2  | WD domain, G-beta repeat domain containing protein, expressed;0.0;1478                              |
| Traes_2AS_53250F380.1  | NADH-ubiquinone oxidoreductase 51 kDa subunit, mitochondrial precursor, putative, expressed;0.0;915 |
| Traes_2AS_5CAE6A22E.1  | FACT complex subunit SPT16, putative, expressed;0.0;1018                                            |
| Traes_2AS_5F11D7ACF.1  | phospholipase C, putative, expressed;8e-125;444                                                     |



|                        |                                                                                                                                   |
|------------------------|-----------------------------------------------------------------------------------------------------------------------------------|
| Traes_2AS_7C18F8EF6.1  | 1-phosphatidylinositol-4-phosphate 5-kinase/ zinc ion binding protein, putative, expressed;0.0;2303                               |
| Traes_2AS_92AA478DA.1  | OsFBX275 - F-box domain containing protein, expressed;1e-97;354                                                                   |
| Traes_2AS_B18B6B26F.1  | BTBN16 - Bric-a-Brac, Tramtrack, Broad Complex BTB domain with non-phototropic hypocotyl 3 NPH3 domain, expressed;0.0;1036        |
| Traes_2AS_B96BB2490.1  | zinc finger C-x8-C-x5-C-x3-H type family protein, expressed;0.0;1036                                                              |
| Traes_2AS_BE8D336DB.1  | ribosome recycling factor, putative, expressed;6e-93;338                                                                          |
| Traes_2AS_BFBFCCAE2.1  | cytochrome P450, putative, expressed;5e-28;120                                                                                    |
| Traes_2AS_DE63DCE1F.2  | RNA recognition motif containing protein, putative, expressed;0.0;875                                                             |
| Traes_2AS_E17243D52.1  | GRAS family transcription factor domain containing protein, expressed;5e-30;128                                                   |
| Traes_2AS_E7FED0F00.1  | pentatricopeptide repeat domain containing protein, putative, expressed;0.0;1051                                                  |
| Traes_2AS_EC975D5AB.2  | alpha-N-arabinofuranosidase A, putative, expressed;0.0;993                                                                        |
| Traes_2AS_FA7059723.1  | MYB family transcription factor, putative, expressed;3e-115;412                                                                   |
| Traes_2BL_0895B944F.2  | OTU-like cysteine protease family protein, putative, expressed;1e-126;451                                                         |
| Traes_2BL_08FC042C0.2  | RNA-binding region RNP-1, putative, expressed;3e-109;394                                                                          |
| Traes_2BL_10C9610DA.1  | cytochrome P450, putative, expressed;0.0;694                                                                                      |
| Traes_2BL_1C31451BE.1  | BTB24 - Bric-a-Brac, Tramtrack, Broad Complex BTB domain with TAZ zinc finger and Calmodulin-binding domains, expressed;1e-45;181 |
| Traes_2BL_3CCE6F0A1.1  | polygalacturonase inhibitor 1 precursor, putative, expressed;1e-45;181                                                            |
| Traes_2BL_428BF7743.1  | cytochrome P450, putative, expressed;0.0;712                                                                                      |
| Traes_2BL_4C1D54940.1  | potassium transporter, putative, expressed;0.0;1205                                                                               |
| Traes_2BL_52480A403.2  | oxidoreductase, short chain dehydrogenase/reductase family, putative, expressed;2e-104;377                                        |
| Traes_2BL_5945B9FDB.1  | histone H1, putative, expressed;8e-26;114                                                                                         |
| Traes_2BL_5DC21F3CD.1  | AP2 domain containing protein, expressed;3e-69;259                                                                                |
| Traes_2BL_6AE8AC28.1   | no apical meristem protein, putative, expressed;8e-121;431                                                                        |
| Traes_2BL_6C9860B0D.1  | expressed protein;1e-34;143                                                                                                       |
| Traes_2BL_6F5788E6F.1  | expressed protein;4e-72;268                                                                                                       |
| Traes_2BL_754076A48.1  | inactive receptor kinase At1g27190 precursor, putative, expressed;4e-81;298                                                       |
| Traes_2BL_78139C29C.2  | expressed protein;4e-123;439                                                                                                      |
| Traes_2BL_7A01C0963.4  | wall-associated receptor kinase-like 20 precursor, putative, expressed;9e-116;414                                                 |
| Traes_2BL_8D03AD41F.1  | cytochrome P450, putative, expressed;1e-116;417                                                                                   |
| Traes_2BL_9DD547641.1  | WD domain, G-beta repeat domain containing protein, expressed;3e-120;429                                                          |
| Traes_2BL_9E38243B01.1 | ZOS7-01 - C2H2 zinc finger protein, expressed;3e-33;139                                                                           |
| Traes_2BL_9E38243B01.1 | ZOS7-01 - C2H2 zinc finger protein, expressed;3e-33;139                                                                           |
| Traes_2BL_AC1A3ADBE.2  | cadmium tolerance factor, putative, expressed;4e-167;587                                                                          |
| Traes_2BL_B15F55EBC.2  | RNA recognition motif containing protein, putative, expressed;0.0;711                                                             |
| Traes_2BL_B4193BAEF.1  | peptide transporter PTR2, putative, expressed;0.0;912                                                                             |
| Traes_2BL_B57DAOC02.2  | L-ascorbate oxidase homolog precursor, putative, expressed;0.0;727                                                                |
| Traes_2BL_B69300543.1  | homeobox associated leucine zipper, putative, expressed;6e-66;248                                                                 |
| Traes_2BL_B9145D951.2  | potassium channel AKT1, putative, expressed;0.0;1174                                                                              |
| Traes_2BL_C3676B9CC.1  | POEI19 - Pollen Ole e I allergen and extensin family protein precursor, expressed;5e-57;219                                       |
| Traes_2BL_C84D00D9B.1  | protein kinase, putative, expressed;2e-47;184                                                                                     |
| Traes_2BL_C9E82112E1.1 | aspartic proteinase nepenthesin precursor, putative, expressed;3e-148;523                                                         |
| Traes_2BL_D48F61FF3.1  | U-box domain-containing protein, putative, expressed;0.0;665                                                                      |
| Traes_2BL_DADDEF6D8.2  | PPR repeat domain containing protein, putative, expressed;0.0;815                                                                 |
| Traes_2BL_E2DCFA60B.1  | calcium-transporting ATPase, plasma membrane-type, putative, expressed;0.0;764                                                    |
| Traes_2BL_E54974B70.1  | pentatricopeptide repeat domain containing protein, putative, expressed;1e-163;573                                                |
| Traes_2BL_E7871AFBA.1  | AP2 domain containing protein, expressed;3e-69;259                                                                                |
| Traes_2BL_EC380C112.1  | TKL_IRAK_CR4L.3 - The CR4L subfamily has homology with Crinkly4, expressed;0.0;697                                                |
| Traes_2BL_EF68D6200.1  | AIR9 protein, putative, expressed;0.0;722                                                                                         |
| Traes_2BL_F304D7728.1  | cytochrome P450, putative, expressed;5e-159;558                                                                                   |
| Traes_2BL_FA3B8F0E5.1  | harpin-induced protein 1 domain containing protein, expressed;4e-71;265                                                           |
| Traes_2BL_FB11AE0BD.1  | polygalacturonase inhibitor 1 precursor, putative, expressed;1e-45;181                                                            |
| Traes_2BL_FB11AE0BD1.1 | polygalacturonase inhibitor 1 precursor, putative, expressed;1e-45;181                                                            |
| Traes_2BS_0AE7A9CC21.1 | expressed protein;3e-138;489                                                                                                      |
| Traes_2BS_0E78C009A.1  | expressed protein;1e-65;247                                                                                                       |
| Traes_2BS_23097C174.1  | zinc finger C-x8-C-x5-C-x3-H type family protein, expressed;0.0;1182                                                              |
| Traes_2BS_2410051E8.1  | histone acetyltransferase HAC5, putative, expressed;0.0;1539                                                                      |
| Traes_2BS_2E4E870EF.1  | ribosome recycling factor, putative, expressed;2e-92;336                                                                          |
| Traes_2BS_58E7D5315.1  | NAD dependent epimerase/dehydratase family domain containing protein, expressed;0.0;651                                           |
| Traes_2BS_5D4F1CEF7.2  | RNA recognition motif containing protein, putative, expressed;0.0;868                                                             |
| Traes_2BS_6374BF6AC.1  | IQ calmodulin-binding motif family protein, expressed;0.0;661                                                                     |
| Traes_2BS_662E31835.2  | expressed protein;5e-107;385                                                                                                      |
| Traes_2BS_72DCCC2AA.1  | cytochrome P450 72A1, putative, expressed;0.0;811                                                                                 |
| Traes_2BS_91EC0D1B7.1  | protein kinase, putative, expressed;0.0;913                                                                                       |
| Traes_2BS_95E3ABC9C.1  | expressed protein;7e-147;518                                                                                                      |
| Traes_2BS_9C52B176E.1  | glucan endo-1,3-beta-glucosidase precursor, putative, expressed;1e-170;597                                                        |

|                        |                                                                                                     |
|------------------------|-----------------------------------------------------------------------------------------------------|
| Traes_2BS_9CB52FFC4.1  | zeta-carotene desaturase, chloroplast/chromoplast precursor, putative, expressed;0.0;1045           |
| Traes_2BS_9D58086CF.1  | pectinesterase, putative, expressed;0.0;796                                                         |
| Traes_2BS_A2C6C9BD6.1  | stripe rust resistance protein Yr10, putative, expressed;4e-58;221                                  |
| Traes_2BS_A4DCE06CE.2  | WD domain, G-beta repeat domain containing protein, expressed;0.0;1607                              |
| Traes_2BS_A594778DC.1  | expressed protein;3e-62;236                                                                         |
| Traes_2BS_B713C8E76.1  | stripe rust resistance protein Yr10, putative, expressed;6e-12;67.0                                 |
| Traes_2BS_CAEF18AAC.1  | DUF1645 domain containing protein, putative, expressed;4e-63;239                                    |
| Traes_2BS_D580B56A3.1  | expressed protein;3e-161;566                                                                        |
| Traes_2BS_E35529023.1  | NADH-ubiquinone oxidoreductase 51 kDa subunit, mitochondrial precursor, putative, expressed;0.0;916 |
| Traes_2BS_E5732CD2C.1  | alpha-N-arabinofuranosidase A, putative, expressed;0.0;991                                          |
| Traes_2BS_E6A403F63.1  | cytochrome P450 72A1, putative, expressed;0.0;822                                                   |
| Traes_2BS_F75822422.1  | expressed protein;5e-167;585                                                                        |
| Traes_2BS_FDABA21A7.1  | GRAS family transcription factor domain containing protein, expressed;0.0;720                       |
| Traes_2DL_037522CF1.1  | RNA recognition motif containing protein, putative, expressed;0.0;717                               |
| Traes_2DL_09A84CB09.1  | expressed protein;3e-70;262                                                                         |
| Traes_2DL_10C74B50E.2  | RNA-binding region RNP-1, putative, expressed;4e-111;401                                            |
| Traes_2DL_3EBEC47B3.1  | polygalacturonase inhibitor 1 precursor, putative, expressed;2e-48;107                              |
| Traes_2DL_6E913E1A4.1  | PsbP, putative, expressed;5e-79;290                                                                 |
| Traes_2DL_75BF1DBF2.1  | pentatricopeptide, putative, expressed;1e-91;333                                                    |
| Traes_2DL_8B3712638.1  | expressed protein;9e-14;75.5                                                                        |
| Traes_2DL_8B66F30F9.1  | ent-kaurene synthase, chloroplast precursor, putative, expressed;0.0;889                            |
| Traes_2DL_9833B9F07.1  | expressed protein;3e-06;48.9                                                                        |
| Traes_2DL_9FDA5C607.1  | cytochrome P450, putative, expressed;3e-72;268                                                      |
| Traes_2DL_AA291009C.1  | AP2 domain containing protein, expressed;5e-07;50.4                                                 |
| Traes_2DL_AB6FEEC91.1  | histone H1, putative, expressed;2e-24;110                                                           |
| Traes_2DL_B250957E6.1  | NB-ARC/LRR disease resistance protein, putative, expressed;3e-54;207                                |
| Traes_2DL_C4B1C27CA.1  | RNA recognition motif containing protein, putative, expressed;1e-48;190                             |
| Traes_2DL_CF9C6D943.2  | protein kinase, putative, expressed;3e-60;228                                                       |
| Traes_2DL_DF7B995C9.2  | no apical meristem protein, putative, expressed;1e-79;275                                           |
| Traes_2DL_EF06B33F9.2  | n/a                                                                                                 |
| Traes_2DL_FAE13169F.1  | calcium-transporting ATPase, plasma membrane-type, putative, expressed;0.0;1731                     |
| Traes_2DL_FE7C9635F.1  | nuclease PA3, putative, expressed;3e-13;71.2                                                        |
| Traes_2DL_FE8D235D5.1  | ZOS7-01 - C2H2 zinc finger protein, expressed;1e-32;137                                             |
| Traes_2DS_0028CD306.1  | zeta-carotene desaturase, chloroplast/chromoplast precursor, putative, expressed;0.0;1030           |
| Traes_2DS_1125D8A30.1  | cytochrome P450 72A1, putative, expressed;0.0;812                                                   |
| Traes_2DS_18DAEBA49.1  | GTPase-activating protein, putative, expressed;1e-139;494                                           |
| Traes_2DS_1AB8B3758.1  | IQ calmodulin-binding motif family protein, expressed;0.0;652                                       |
| Traes_2DS_1C28A840C.2  | amidase, putative, expressed;3e-43;171                                                              |
| Traes_2DS_1E14A1C3A.2  | Phosphatidylinositol kinase and FAT containing domain protein, putative, expressed;0.0;2120         |
| Traes_2DS_29ED1D7E0.1  | protein kinase, putative, expressed;0.0;922                                                         |
| Traes_2DS_2EC803D72.1  | DUF1645 domain containing protein, putative, expressed;4e-08;54.3                                   |
| Traes_2DS_2FAFF7235.1  | transposon protein, putative, unclassified, expressed;3e-43;174                                     |
| Traes_2DS_398F9E2F9.1  | RNA recognition motif containing protein, putative, expressed;3e-19;91.3                            |
| Traes_2DS_3A03E6866.1  | lectin-like receptor kinase, putative, expressed;3e-116;416                                         |
| Traes_2DS_49959692B.1  | MYB family transcription factor, putative, expressed;2e-102;369                                     |
| Traes_2DS_49959692B1.1 | MYB family transcription factor, putative, expressed;2e-102;369                                     |
| Traes_2DS_5C8A4D416.1  | dimethyladenosine transferase, putative, expressed;1e-136;483                                       |
| Traes_2DS_64F37A63E.1  | cytochrome P450, putative, expressed;0.0;647                                                        |
| Traes_2DS_795D042B8.1  | flavin-containing monooxygenase family protein, putative, expressed;0.0;677                         |
| Traes_2DS_867D0797A.2  | ribosome recycling factor, putative, expressed;1e-36;148                                            |
| Traes_2DS_93608B31A.1  | cytochrome b6, putative, expressed;2e-30;131                                                        |
| Traes_2DS_9B86CE58D.1  | alpha-N-arabinofuranosidase A, putative, expressed;0.0;966                                          |
| Traes_2DS_C911681D1.1  | NADH-ubiquinone oxidoreductase 51 kDa subunit, mitochondrial precursor, putative, expressed;0.0;804 |
| Traes_2DS_DE9475523.2  | n/a                                                                                                 |
| Traes_2DS_E5E62E1DF.1  | expressed protein;1e-140;497                                                                        |
| Traes_2DS_F9104B72E.1  | FACT complex subunit SPT16, putative, expressed;0.0;1245                                            |
| Traes_3AL_0D611A4EF.2  | SET domain containing protein, expressed;2e-100;363                                                 |
| Traes_3AL_14F4067BA.1  | cytochrome b6, putative, expressed;4e-31;133                                                        |
| Traes_3AL_20404D7E4.1  | mitochondrial-processing peptidase subunit, mitochondrial precursor, putative, expressed;9e-163;570 |
| Traes_3AL_2975257C3.1  | expressed protein;0.0;952                                                                           |
| Traes_3AL_30C211BB7.1  | expressed protein;0.0;764                                                                           |
| Traes_3AL_32C9EEC67.1  | antigen peptide transporter-like 1, chloroplast precursor, putative, expressed;2e-149;527           |
| Traes_3AL_37EA7312B.2  | pentatricopeptide repeat protein PPR1106-17, putative, expressed;0.0;672                            |
| Traes_3AL_3CE8B4063.1  | transcriptional corepressor LEUNIG, putative, expressed;0.0;784                                     |

|                         |                                                                                                 |
|-------------------------|-------------------------------------------------------------------------------------------------|
| Traes_3AL_8C6F4F66A.1   | GHMP kinases ATP-binding protein, putative, expressed;1e-127;454                                |
| Traes_3AL_9005F85AF.1   | expressed protein;5e-170;596                                                                    |
| Traes_3AL_925AAD7CE.1   | ATP binding protein, putative, expressed;1e-131;467                                             |
| Traes_3AL_A066DC175.1   | beta-galactosidase precursor, putative, expressed;4e-32;134                                     |
| Traes_3AL_AF9D811C3.1   | expressed protein;2e-107;387                                                                    |
| Traes_3AL_CA6B6A8CE.1   | SET domain protein SDG117, putative, expressed;9e-12;67.0                                       |
| Traes_3AL_D3D600952.1   | S-locus-like receptor protein kinase, putative, expressed;0.0;1279                              |
| Traes_3AL_DDD7627D7.1   | WD domain, G-beta repeat domain containing protein, expressed;1e-75;280                         |
| Traes_3AL_E4A0B69C5.2   | galactosyltransferase, putative, expressed;4e-83;304                                            |
| Traes_3AL_EB28DB33C.2   | lipase, putative, expressed;0.0;897                                                             |
| Traes_3AL_FF2267EF5.2   | zinc finger family protein, putative, expressed;0.0;825                                         |
| Traes_3AS_0D233DB25.1   | glucosidase II beta subunit-like domain containing protein, expressed;3e-152;535                |
| Traes_3AS_42E490701.1   | monocopper oxidase, putative, expressed;3e-79;293                                               |
| Traes_3AS_43D5892CB.2   | retrotransposon protein, putative, Ty1-copia subclass, expressed;0.0;1617                       |
| Traes_3AS_49AE2778F.1   | expressed protein;3e-14;74.3                                                                    |
| Traes_3AS_4E21250EA.2   | wax synthase, putative, expressed;2e-134;477                                                    |
| Traes_3AS_5B1F212B0.1   | transposon protein, putative, unclassified, expressed;5e-44;173                                 |
| Traes_3AS_6678A7D6F.1   | cytochrome P450, putative, expressed;2e-88;322                                                  |
| Traes_3AS_6706B4CCE.1   | cytochrome b6, putative, expressed;1e-25;113                                                    |
| Traes_3AS_6AC58CA11.2   | ternary complex factor MIP1, putative, expressed;1e-55;214                                      |
| Traes_3AS_8D2099B24.1   | nodal modulator 1 precursor, putative, expressed;2e-68;255                                      |
| Traes_3AS_9CB9425D81.11 | pentatricopeptide, putative, expressed;0.0;1827                                                 |
| Traes_3AS_A9D946CDB.1   | importin-alpha re-exporter, putative, expressed;0.0;1224                                        |
| Traes_3AS_ACBC778FF.2   | XIK, putative, expressed;0.0;903                                                                |
| Traes_3AS_ACC13CC21.1   | transposon protein, putative, unclassified, expressed;0.0;812                                   |
| Traes_3AS_B6616C762.1   | expressed protein;1e-65;246                                                                     |
| Traes_3AS_C11206884.1   | expressed protein;7e-152;535                                                                    |
| Traes_3AS_EDDA9E245.1   | cytokinin dehydrogenase precursor, putative, expressed;7e-28;119                                |
| Traes_3AS_F0C76D06E.1   | retrotransposon protein, putative, unclassified, expressed;6e-09;57.0                           |
| Traes_3AS_F0C76D06E1.1  | retrotransposon protein, putative, unclassified, expressed;6e-09;57.0                           |
| Traes_3B_00AC7406E.2    | GDSL-like lipase/acylhydrolase, putative, expressed;4e-77;286                                   |
| Traes_3B_017090820.1    | AP2/EREBP transcription factor BABY BOOM, putative, expressed;7e-127;452                        |
| Traes_3B_02B5D826F.1    | heat shock protein 101, putative, expressed;0.0;872                                             |
| Traes_3B_0DFD83BB0.1    | receptor-like protein kinase precursor, putative, expressed;0.0;1233                            |
| Traes_3B_1C2CC2737.1    | expressed protein;2e-171;600                                                                    |
| Traes_3B_1DE4243CF.1    | WD domain, G-beta repeat domain containing protein, expressed;4e-76;281                         |
| Traes_3B_204F59612.1    | importin-alpha re-exporter, putative, expressed;0.0;1225                                        |
| Traes_3B_240E7DC49.2    | expressed protein;3e-156;550                                                                    |
| Traes_3B_27823CD65.1    | expressed protein;4e-29;125                                                                     |
| Traes_3B_3007A0B49.1    | plastocyanin-like domain containing protein, putative, expressed;2e-65;246                      |
| Traes_3B_36B347970.1    | ion channel DMI1, chloroplast precursor, putative, expressed;0.0;1247                           |
| Traes_3B_3F6764629.2    | wax synthase, putative, expressed;1e-147;521                                                    |
| Traes_3B_422A54CF6.1    | leucoanthocyanidin dioxygenase, putative, expressed;3e-118;422                                  |
| Traes_3B_4745DEECD.1    | aquaporin protein, putative, expressed;1e-60;229                                                |
| Traes_3B_4A757460F.1    | cytochrome P450, putative, expressed;0.0;728                                                    |
| Traes_3B_4D8D01EDC.1    | AP2 domain containing protein, expressed;3e-28;122                                              |
| Traes_3B_52F9AF137.1    | phosphoesterase family protein, putative, expressed;1e-78;290                                   |
| Traes_3B_5CE03374D.1    | ATP binding protein, putative, expressed;0.0;852                                                |
| Traes_3B_6F94B79ED.1    | expressed protein;2e-80;296                                                                     |
| Traes_3B_6FF962479.6    | pentatricopeptide, putative, expressed;0.0;1764                                                 |
| Traes_3B_728668685.1    | glycosyl hydrolases family 17, putative, expressed;3e-113;406                                   |
| Traes_3B_783145518.1    | outer membrane protein, OMP85 family protein, expressed;5e-55;211                               |
| Traes_3B_7FA6E49BC.2    | transcriptional corepressor LEUNIG, putative, expressed;0.0;783                                 |
| Traes_3B_814B63B3B.1    | sulfotransferase domain containing protein, expressed;2e-121;432                                |
| Traes_3B_89B839481.1    | zinc finger family protein, putative, expressed;1e-19;94.4                                      |
| Traes_3B_91C0A4F75.1    | glucosidase II beta subunit-like domain containing protein, expressed;1e-158;557                |
| Traes_3B_987C3D183.2    | retrotransposon protein, putative, Ty1-copia subclass, expressed;0.0;1677                       |
| Traes_3B_9F2AF0F06.2    | expressed protein;6e-44;175                                                                     |
| Traes_3B_A06D9FE4E.1    | pentatricopeptide repeat protein PPR1106-17, putative, expressed;0.0;912                        |
| Traes_3B_A0CFD8B09.1    | cytochrome P450, putative, expressed;0.0;708                                                    |
| Traes_3B_A53AE2708.2    | NAD binding domain of 6-phosphogluconate dehydrogenase containing protein, expressed;3e-128;456 |
| Traes_3B_A62194A70.1    | phosphoesterase family protein, putative, expressed;9e-78;287                                   |
| Traes_3B_A8D8007CE.3    | PPR repeat domain containing protein, putative, expressed;0.0;793                               |
| Traes_3B_AAA567A7C.2    | Sad1 / UNC-like C-terminal domain containing protein, putative, expressed;3e-79;293             |

|                        |                                                                                                                        |
|------------------------|------------------------------------------------------------------------------------------------------------------------|
| Traes_3B_ACA0B2FE3.2   | embryo-specific 3, putative, expressed;1e-55;213                                                                       |
| Traes_3B_B018E0E3F.1   | antigen peptide transporter-like 1, chloroplast precursor, putative, expressed;7e-149;525                              |
| Traes_3B_B0B39F08E.2   | XIK, putative, expressed;0.0;909                                                                                       |
| Traes_3B_BB678EDC9.2   | mitochondrial-processing peptidase subunit, mitochondrial precursor, putative, expressed;0.0;746                       |
| Traes_3B_C3CA81F1A.1   | OsFBK23 - F-box domain and kelch repeat containing protein, expressed;0.0;701                                          |
| Traes_3B_C6D1C9CD6.1   | histone-lysine N-methyltransferase SUV3, putative, expressed;1e-33;140                                                 |
| Traes_3B_D214CA621.2   | expressed protein;6e-151;532                                                                                           |
| Traes_3B_D4422DD53.2   | DDT domain containing protein, putative, expressed;0.0;1852                                                            |
| Traes_3B_D8913A925.1   | sulfotransferase domain containing protein, expressed;4e-58;220                                                        |
| Traes_3B_D8913A9251.1  | sulfotransferase domain containing protein, expressed;4e-58;220                                                        |
| Traes_3B_DABF51922.2   | n/a                                                                                                                    |
| Traes_3B_DC47DEA94.2   | GHMP kinases ATP-binding protein, putative, expressed;4e-150;529                                                       |
| Traes_3B_E041382C5.2   | powdery mildew resistance protein PM3b, putative, expressed;0.0;984                                                    |
| Traes_3B_E613D74C7.2   | galactosyltransferase, putative, expressed;4e-165;578                                                                  |
| Traes_3B_F05B72B99.1   | alpha-1,4-glucan-protein synthase, putative, expressed;0.0;666                                                         |
| Traes_3B_F68129CD7.2   | sulfotransferase domain containing protein, expressed;7e-120;427                                                       |
| Traes_3DL_0253F1D11.1  | antigen peptide transporter-like 1, chloroplast precursor, putative, expressed;2e-148;524                              |
| Traes_3DL_17927771F.1  | BTBM1 - Bric-a-Brac, Tramtrack, Broad Complex BTB domain with Meprin and TRAF Homology MATH domain, expressed;0.0;902  |
| Traes_3DL_29E0DEE5.2   | pentatricopeptide repeat protein PPR1106-17, putative, expressed;6e-116;414                                            |
| Traes_3DL_2BE060085.1  | outer mitochondrial membrane porin, putative, expressed;1e-118;423                                                     |
| Traes_3DL_3EF10D41F.1  | expressed protein;0.0;902                                                                                              |
| Traes_3DL_4A579C5AE.2  | GHMP kinases ATP-binding protein, putative, expressed;1e-139;493                                                       |
| Traes_3DL_4C13F598C.1  | transposon protein, putative, unclassified, expressed;2e-93;340                                                        |
| Traes_3DL_550A28DCA.1  | WD domain, G-beta repeat domain containing protein, expressed;4e-76;281                                                |
| Traes_3DL_70DB0CBC9.1  | expressed protein;7e-55;196                                                                                            |
| Traes_3DL_8B8C61B5C.2  | galactosyltransferase, putative, expressed;6e-40;159                                                                   |
| Traes_3DL_92202CE15.1  | MBTB21 - Bric-a-Brac, Tramtrack, Broad Complex BTB domain with Meprin and TRAF Homology MATH domain, expressed;0.0;658 |
| Traes_3DL_9D99D436E.6  | n/a                                                                                                                    |
| Traes_3DL_9F783D300.1  | mitochondrial-processing peptidase subunit, mitochondrial precursor, putative, expressed;0.0;658                       |
| Traes_3DL_A2127FABF7.1 | alpha-1,4-glucan-protein synthase, putative, expressed;3e-16;81.3                                                      |
| Traes_3DL_B1C067FC9.1  | expressed protein;0.0;735                                                                                              |
| Traes_3DL_B3425E966.2  | SET domain protein SDG117, putative, expressed;6e-12;67.0                                                              |
| Traes_3DL_B9B059069.1  | expressed protein;9e-14;73.2                                                                                           |
| Traes_3DL_ECC7B3DDC.2  | transcriptional corepressor LEUNIG, putative, expressed;3e-133;473                                                     |
| Traes_3DS_072E3F246.2  | pentatricopeptide, putative, expressed;0.0;1667                                                                        |
| Traes_3DS_1A8DD29C0.1  | cytochrome b6, putative, expressed;4e-19;91.7                                                                          |
| Traes_3DS_47560A18D.1  | n/a                                                                                                                    |
| Traes_3DS_ACCBCF727.1  | importin-alpha re-exporter, putative, expressed;4e-146;514                                                             |
| Traes_3DS_E60A79C15.3  | exostosin family protein, putative, expressed;6e-112;400                                                               |
| Traes_3DS_E843BD60D.1  | glucosidase II beta subunit-like domain containing protein, expressed;7e-31;129                                        |
| Traes_4AL_08650B7FC.1  | expressed protein;2e-08;55.5                                                                                           |
| Traes_4AL_197CAE419.1  | aberrant pollen transmission 1, putative, expressed;2e-139;493                                                         |
| Traes_4AL_19C21724F.2  | protein transporter, putative, expressed;1e-154;544                                                                    |
| Traes_4AL_2C949D942.1  | PIII4 - Proteinase inhibitor II family protein precursor, expressed;1e-16;82.4                                         |
| Traes_4AL_2F2190057.1  | cytokinin-O-glucosyltransferase 2, putative, expressed;1e-166;408                                                      |
| Traes_4AL_3C5D2E722.2  | spotted leaf 11, putative, expressed;4e-90;328                                                                         |
| Traes_4AL_4B411B3A7.1  | spermidine synthase, putative, expressed;4e-151;532                                                                    |
| Traes_4AL_5AA1DFD55.1  | retinol dehydrogenase, putative, expressed;1e-119;427                                                                  |
| Traes_4AL_5B5B861D1.1  | D-mannose binding lectin family protein, expressed;0.0;1028                                                            |
| Traes_4AL_60DF5384D.1  | expressed protein;2e-100;362                                                                                           |
| Traes_4AL_6BCC55248.1  | ubiquitin carboxyl-terminal hydrolase domain containing protein, expressed;0.0;862                                     |
| Traes_4AL_77A43AE68.2  | Cupin domain containing protein, expressed;3e-54;208                                                                   |
| Traes_4AL_84D1591DF.1  | ankyrin repeat family protein, putative, expressed;9e-69;258                                                           |
| Traes_4AL_884BA5746.1  | nodulation-signaling pathway 2 protein, putative, expressed;1e-135;481                                                 |
| Traes_4AL_8B67440A2.1  | 1-phosphatidylinositol-4-phosphate 5-kinase/ zinc ion binding protein, putative, expressed;0.0;1640                    |
| Traes_4AL_A5B9F7B36.1  | aminotransferase, classes I and II, domain containing protein, expressed;0.0;644                                       |
| Traes_4AL_B0ABF8863.2  | expressed protein;9e-75;278                                                                                            |
| Traes_4AL_BE200647B.1  | cyclin, putative, expressed;3e-129;369                                                                                 |
| Traes_4AL_D48452758.1  | TATA-binding protein, putative, expressed;8e-97;350                                                                    |
| Traes_4AL_E8C519202.1  | cytochrome b6, putative, expressed;2e-10;62.0                                                                          |
| Traes_4AL_E9E72DEE2.1  | subtilisin N-terminal Region family protein, expressed;2e-34;141                                                       |
| Traes_4AL_F75EDC0121.1 | expressed protein;8e-102;368                                                                                           |
| Traes_4AL_F85A4543B.1  | Cupin domain containing protein, expressed;4e-69;258                                                                   |
| Traes_4AL_F9DCE24F4.1  | fatty acid desaturase, putative, expressed;0.0;647                                                                     |

|                        |                                                                                                     |
|------------------------|-----------------------------------------------------------------------------------------------------|
| Traes_4AL_FA94601FA.1  | nodulin, putative, expressed;2e-63;239                                                              |
| Traes_4AL_FE0AC7213.2  | RNA polymerase III RPC4 domain containing protein, expressed;1e-67;254                              |
| Traes_4AL_FF379258F.1  | auxin efflux carrier component, putative, expressed;2e-67;252                                       |
| Traes_4AS_02DDB73FF.1  | CUE domain containing protein, expressed;2e-120;431                                                 |
| Traes_4AS_197CAE419.1  | aberrant pollen transmission 1, putative, expressed;2e-139;493                                      |
| Traes_4AS_3075D8D45.1  | expressed protein;7e-45;177                                                                         |
| Traes_4AS_4B47AEE0D.2  | KIP1, putative, expressed;0.0;1006                                                                  |
| Traes_4AS_547AD04C7.2  | expressed protein;4e-98;355                                                                         |
| Traes_4AS_56B8F305C.1  | expressed protein;0.0;816                                                                           |
| Traes_4AS_58DE58B00.1  | flap endonuclease, putative, expressed;0.0;1624                                                     |
| Traes_4AS_58DE58B001.1 | flap endonuclease, putative, expressed;0.0;1624                                                     |
| Traes_4AS_5F95A9C48.2  | OsSub27 - Putative Subtilisin homologue, expressed;0.0;1103                                         |
| Traes_4AS_6740A0426.2  | n/a                                                                                                 |
| Traes_4AS_6F3D0F407.1  | DNAJ heat shock N-terminal domain-containing protein, putative, expressed;0.0;706                   |
| Traes_4AS_8E594F267.1  | tetratricopeptide repeat domain containing protein, expressed;5e-111;398                            |
| Traes_4AS_9089F11EC.1  | RNase L inhibitor protein-related, putative, expressed;5e-101;365                                   |
| Traes_4AS_92067319F.1  | no apical meristem protein, putative, expressed;0.0;720                                             |
| Traes_4AS_B59D0F85B.1  | mannose-1-phosphate guanyltransferase, putative, expressed;0.0;665                                  |
| Traes_4AS_C3BC395FC.1  | OsSCP11 - Putative Serine Carboxypeptidase homologue, expressed;4e-177;619                          |
| Traes_4AS_D7511DC6D.1  | transmembrane amino acid transporter protein, putative, expressed;0.0;898                           |
| Traes_4AS_D763D08C2.2  | eukaryotic translation initiation factor, putative, expressed;4e-55;211                             |
| Traes_4AS_E5556AFAD.1  | DEAD-box ATP-dependent RNA helicase, putative, expressed;0.0;1100                                   |
| Traes_4AS_E8C519202.1  | cytochrome b6, putative, expressed;2e-10;62.0                                                       |
| Traes_4AS_F0BE29CA6.2  | receptor-like protein kinase precursor, putative, expressed;0.0;1494                                |
| Traes_4BL_0726DD6EC.1  | tetratricopeptide repeat domain containing protein, expressed;1e-109;394                            |
| Traes_4BL_12097D3B9.1  | OsSCP11 - Putative Serine Carboxypeptidase homologue, expressed;5e-135;478                          |
| Traes_4BL_14F4067BA.1  | cytochrome b6, putative, expressed;4e-31;133                                                        |
| Traes_4BL_1C4500370.1  | DNAJ heat shock N-terminal domain-containing protein, putative, expressed;4e-173;605                |
| Traes_4BL_2136196AE.2  | no apical meristem protein, putative, expressed;0.0;716                                             |
| Traes_4BL_3A5910C81.2  | 3-5 exonuclease family protein, putative, expressed;1e-44;178                                       |
| Traes_4BL_455C9E392.1  | mannose-1-phosphate guanyltransferase, putative, expressed;0.0;666                                  |
| Traes_4BL_63129F6EA.1  | OsSub27 - Putative Subtilisin homologue, expressed;2e-80;296                                        |
| Traes_4BL_69CCE3A33.1  | expressed protein;0.0;815                                                                           |
| Traes_4BL_84545B3BC.2  | CUE domain containing protein, expressed;0.0;992                                                    |
| Traes_4BL_96D26EBE3.2  | eukaryotic translation initiation factor, putative, expressed;4e-55;211                             |
| Traes_4BL_AB6EA9652.1  | cyclin-dependent kinase A-1, putative, expressed;1e-112;402                                         |
| Traes_4BL_B25D04B2A.1  | expressed protein;3e-46;182                                                                         |
| Traes_4BL_BBD90FBEE.1  | expressed protein;4e-54;207                                                                         |
| Traes_4BL_CE91DFE45.1  | 60S ribosomal protein L18-3, putative, expressed;8e-96;347                                          |
| Traes_4BL_D9E97AA3B.1  | transmembrane amino acid transporter protein, putative, expressed;6e-103;370                        |
| Traes_4BL_E8209275B.1  | cytochrome P450 protein, putative, expressed;4e-06;47.4                                             |
| Traes_4BS_14F4067BA.1  | cytochrome b6, putative, expressed;4e-31;133                                                        |
| Traes_4BS_4DA228A0D.4  | Cupin domain containing protein, expressed;1e-65;247                                                |
| Traes_4BS_4E68C8E47.1  | cupin domain containing protein, expressed;2e-123;441                                               |
| Traes_4BS_5930EF5D6.1  | aminotransferase, classes I and II, domain containing protein, expressed;0.0;798                    |
| Traes_4BS_5E12F0B27.1  | AGC_AGC_other_GWLD.2 - ACG kinases include homologs to PKA, PKG and PKC, expressed;0.0;1837         |
| Traes_4BS_6067314D4.2  | HEAT repeat family protein, putative, expressed;0.0;1194                                            |
| Traes_4BS_77C3CDB1D.1  | zinc finger protein-related, putative, expressed;5e-142;502                                         |
| Traes_4BS_9D72D851C.1  | dirigent, putative, expressed;9e-66;247                                                             |
| Traes_4BS_ACBE893D5.1  | phytanoyl-CoA dioxygenase, putative, expressed;2e-133;472                                           |
| Traes_4BS_B0651AAC8.1  | 1-phosphatidylinositol-4-phosphate 5-kinase/ zinc ion binding protein, putative, expressed;0.0;1647 |
| Traes_4BS_D2F0025CE.2  | expressed protein;3e-103;372                                                                        |
| Traes_4DL_05BF7F181.1  | expressed protein;3e-32;136                                                                         |
| Traes_4DL_144856316.1  | hsp20/alpha crystallin family protein, putative, expressed;1e-58;222                                |
| Traes_4DL_1603FCED3.2  | DEAD-box ATP-dependent RNA helicase, putative, expressed;0.0;1111                                   |
| Traes_4DL_20B81B9E9.1  | 3-5 exonuclease family protein, putative, expressed;2e-70;264                                       |
| Traes_4DL_260D64264.1  | cell cycle checkpoint protein RAD17, putative, expressed;0.0;639                                    |
| Traes_4DL_27051274A.2  | expressed protein;8e-102;367                                                                        |
| Traes_4DL_28E7C238E.2  | no apical meristem protein, putative, expressed;1e-107;386                                          |
| Traes_4DL_2C636B5DB.2  | KIP1, putative, expressed;0.0;1996                                                                  |
| Traes_4DL_427175FD6.2  | expressed protein;2e-169;593                                                                        |
| Traes_4DL_4955B6A74.1  | CUE domain containing protein, expressed;4e-05;44.3                                                 |
| Traes_4DL_4B08D7DF4.1  | OsSCP11 - Putative Serine Carboxypeptidase homologue, expressed;4e-116;415                          |
| Traes_4DL_5138702FD.1  | cytochrome P450 protein, putative, expressed;2e-09;58.5                                             |

|                        |                                                                                                            |
|------------------------|------------------------------------------------------------------------------------------------------------|
| Traes_4DL_562002F72.1  | OsSub27 - Putative Subtilisin homologue, expressed;1e-137;487                                              |
| Traes_4DL_66BE3C639.2  | cytochrome P450, putative, expressed;0.0;655                                                               |
| Traes_4DL_69A2A1F13.1  | modifier of rudimentary protein, expressed;1e-65;246                                                       |
| Traes_4DL_78705D128.3  | expressed protein;2e-101;366                                                                               |
| Traes_4DL_816A82380.1  | receptor-like protein kinase precursor, putative, expressed;0.0;1504                                       |
| Traes_4DL_9C6C9CB1A.1  | 14-3-3 protein, putative, expressed;6e-58;211                                                              |
| Traes_4DL_A8AE227C0.1  | tetratricopeptide repeat domain containing protein, expressed;8e-112;401                                   |
| Traes_4DL_BCA20D7B4.1  | RNase L inhibitor protein-related, putative, expressed;3e-91;332                                           |
| Traes_4DL_BF0B81D38.2  | transmembrane amino acid transporter protein, putative, expressed;0.0;884                                  |
| Traes_4DL_DE7774064.1  | eukaryotic translation initiation factor, putative, expressed;4e-55;211                                    |
| Traes_4DL_E2CE97697.1  | 1-phosphatidylinositol-4-phosphate 5-kinase/ zinc ion binding protein, putative, expressed;0.0;1652        |
| Traes_4DL_F647D6077.1  | zinc finger C-x8-C-x5-C-x3-H type family protein, expressed;1e-21;99.4                                     |
| Traes_4DS_0B314A876.1  | expressed protein;1e-44;177                                                                                |
| Traes_4DS_1CF5D9107.1  | fatty acid desaturase, putative, expressed;0.0;665                                                         |
| Traes_4DS_50A614BFB.1  | CCT/B-box zinc finger protein, putative, expressed;1e-81;301                                               |
| Traes_4DS_54CE7EA5E.1  | expressed protein;0.0;867                                                                                  |
| Traes_4DS_5835552DF.1  | expressed protein;2e-48;189                                                                                |
| Traes_4DS_700213C0B.1  | TATA-binding protein, putative, expressed;6e-104;374                                                       |
| Traes_4DS_998201C4C.3  | expressed protein;2e-107;386                                                                               |
| Traes_4DS_B329DED6D.1  | cyclin, putative, expressed;3e-137;486                                                                     |
| Traes_4DS_BB124F81F.1  | aminotransferase, classes I and II, domain containing protein, expressed;0.0;784                           |
| Traes_4DS_BDB03ED9C.3  | potassium channel protein, putative, expressed;1e-97;354                                                   |
| Traes_4DS_C2E6D3176.1  | cupin domain containing protein, expressed;7e-130;462                                                      |
| Traes_4DS_D50FB82F2.1  | oxygen evolving enhancer protein 3 domain containing protein, expressed;3e-42;169                          |
| Traes_4DS_D71562B14.1  | Cupin domain containing protein, expressed;3e-68;255                                                       |
| Traes_4DS_D7894C5BF.1  | Cupin domain containing protein, expressed;2e-67;253                                                       |
| Traes_4DS_F495922CB.2  | Cupin domain containing protein, expressed;3e-66;249                                                       |
| Traes_4DS_FF5323EAC.1  | dirigent, putative, expressed;3e-65;245                                                                    |
| Traes_5AL_06DC5CDA7.1  | AP2 domain containing protein, expressed;4e-39;158                                                         |
| Traes_5AL_0E7E66066.1  | mTERF family protein, expressed;8e-24;106                                                                  |
| Traes_5AL_12B7B7A3B.1  | retrotransposon protein, putative, unclassified, expressed;1e-16;83.6                                      |
| Traes_5AL_1A119E73D.1  | WD domain, G-beta repeat domain containing protein, expressed;0.0;1365                                     |
| Traes_5AL_20D235B9F.1  | pentatricopeptide, putative, expressed;2e-138;490                                                          |
| Traes_5AL_2A40F0298.1  | AGC_PVPK_like_kin82y.16 - ACG kinases include homologs to PKA, PKG and PKC, expressed;0.0;655              |
| Traes_5AL_3618D7967.1  | expressed protein;0.0;838                                                                                  |
| Traes_5AL_588A7DB54.1  | protein kinase, putative, expressed;3e-17;84.7                                                             |
| Traes_5AL_832CDADB8.1  | OsSCP44 - Putative Serine Carboxypeptidase homologue, expressed;3e-169;592                                 |
| Traes_5AL_984F155C1.2  | PHLOEM 2-LIKE A10, putative, expressed;1e-39;157                                                           |
| Traes_5AL_98521B264.1  | transcription factor, putative, expressed;3e-10;61.2                                                       |
| Traes_5AL_A3A857B99.2  | expressed protein;8e-66;247                                                                                |
| Traes_5AL_BB0405CD3.1  | pollen signalling protein with adenyl cyclase activity, putative, expressed;0.0;903                        |
| Traes_5AL_E8D0BB87B.3  | NAD dependent epimerase/dehydratase family protein, putative, expressed;0.0;729                            |
| Traes_5AL_EE3A00A12.2  | cyclin-dependent kinase A-1, putative, expressed;4e-118;421                                                |
| Traes_5AL_F6064A23A.2  | expressed protein;0.0;1113                                                                                 |
| Traes_5AS_94ACA1538.1  | cytochrome b6, putative, expressed;3e-28;123                                                               |
| Traes_5BL_028D02DF6.1  | homeobox associated leucine zipper, putative, expressed;3e-44;176                                          |
| Traes_5BL_03D637203.1  | cytochrome P450, putative, expressed;2e-145;514                                                            |
| Traes_5BL_0D3F2CF69.2  | Ser/Thr protein phosphatase family protein, putative, expressed;3e-158;556                                 |
| Traes_5BL_111B47D32.1  | PHLOEM 2-LIKE A10, putative, expressed;7e-121;431                                                          |
| Traes_5BL_1FC1BC551.1  | oxidoreductase, short chain dehydrogenase/reductase family domain containing protein, expressed;8e-130;461 |
| Traes_5BL_3D2A3CDD6.1  | transcription initiation factor IIB, putative, expressed;0.0;708                                           |
| Traes_5BL_3EDC2B2CE.1  | lissencephaly type-1-like homology motif, putative, expressed;0.0;676                                      |
| Traes_5BL_4332A094A.1  | ubiquitin family protein, putative, expressed;6e-73;272                                                    |
| Traes_5BL_4332A094A1.1 | ubiquitin family protein, putative, expressed;6e-73;272                                                    |
| Traes_5BL_545CD9F8B1.1 | mitochondrial carrier protein, putative, expressed;1e-122;437                                              |
| Traes_5BL_5C2E1C7F8.2  | OsSAUR40 - Auxin-responsive SAUR gene family member, expressed;5e-55;210                                   |
| Traes_5BL_5CE389C1A.2  | cytochrome P450, putative, expressed;2e-83;305                                                             |
| Traes_5BL_5F432CEF9.1  | UDP-glucuronosyl and UDP-glucosyl transferase domain containing protein, expressed;2e-116;407              |
| Traes_5BL_625657BE4.1  | cytochrome P450, putative, expressed;1e-110;397                                                            |
| Traes_5BL_63DA0055E.2  | expressed protein;4e-56;216                                                                                |
| Traes_5BL_68BDA8BC7.1  | pirin, putative, expressed;3e-143;505                                                                      |
| Traes_5BL_691C79CF8.1  | stress-induced protein, putative, expressed;8e-72;209                                                      |
| Traes_5BL_6B0820536.1  | IBR domain containing protein, expressed;9e-135;478                                                        |
| Traes_5BL_6F5717D80.1  | IscA-like iron-sulfur assembly protein, mitochondrial precursor, putative, expressed;5e-48;187             |

|                        |                                                                                                            |
|------------------------|------------------------------------------------------------------------------------------------------------|
| Traes_5BL_7444BC60E.1  | pollen signalling protein with adenylyl cyclase activity, putative, expressed;0.0;936                      |
| Traes_5BL_7FB30012A.1  | PPR repeat domain containing protein, putative, expressed;0.0;1191                                         |
| Traes_5BL_8512C24F7.1  | periplasmic beta-glucosidase precursor, putative, expressed;0.0;890                                        |
| Traes_5BL_902F46492.1  | ZOSS-12 - C2H2 zinc finger protein, expressed;2e-23;105                                                    |
| Traes_5BL_90FC7AB89.1  | OsFBDUF47 - F-box and DUF domain containing protein, expressed;0.0;785                                     |
| Traes_5BL_94C5B581B.1  | expressed protein;1e-97;355                                                                                |
| Traes_5BL_9A8443C38.1  | reticuline oxidase-like protein precursor, putative, expressed;9e-162;568                                  |
| Traes_5BL_B58E08F2F.1  | OsSub57 - Putative Subtilisin homologue, expressed;0.0;1145                                                |
| Traes_5BL_B724A4311.1  | peptidyl-prolyl cis-trans isomerase, putative, expressed;7e-104;374                                        |
| Traes_5BL_C05A786BB.1  | NAD dependent epimerase/dehydratase family protein, putative, expressed;0.0;731                            |
| Traes_5BL_C08428870.1  | transcription factor, putative, expressed;6e-175;612                                                       |
| Traes_5BL_C4CA0822B.1  | Cupin domain containing protein, expressed;7e-70;261                                                       |
| Traes_5BL_C79594291.1  | mTERF family protein, expressed;3e-102;369                                                                 |
| Traes_5BL_C99C99B3C.1  | expressed protein;0.0;1092                                                                                 |
| Traes_5BL_CD6CD078C.1  | leucine-rich repeat receptor protein kinase EXS precursor, putative, expressed;2e-18;57.8                  |
| Traes_5BL_D3FF5C8C9.1  | expressed protein;2e-46;181                                                                                |
| Traes_5BL_DFFA40472.1  | D-mannose binding lectin family protein, expressed;0.0;1054                                                |
| Traes_5BL_E0C2C7D72.2  | leaf senescence related protein, putative, expressed;0.0;748                                               |
| Traes_5BL_E48CF8316.1  | Cupin domain containing protein, expressed;1e-68;257                                                       |
| Traes_5BL_ECA7A48BC.2  | expressed protein;2e-47;185                                                                                |
| Traes_5BL_EF54ABD85.1  | OsSub7 - Putative Subtilisin homologue, expressed;1e-128;457                                               |
| Traes_5BL_F51D3D269.1  | crcB-like protein, expressed;4e-21;97.4                                                                    |
| Traes_5BL_F8A34CF5A.1  | HLS, putative, expressed;1e-104;377                                                                        |
| Traes_5BL_FC6D62A99.1  | oxidoreductase, short chain dehydrogenase/reductase family domain containing protein, expressed;2e-77;286  |
| Traes_5BS_2C2072466.1  | Glutaredoxin, thioredoxin-like superfamily                                                                 |
| Traes_5BS_3DA538381.2  | chalcone and stilbene synthases, putative, expressed;6e-180;628                                            |
| Traes_5BS_409B24307.1  | Glutaredoxin, thioredoxin-like superfamily                                                                 |
| Traes_5BS_685364484.1  | reticulon domain containing protein, putative, expressed;7e-95;345                                         |
| Traes_5BS_742D62174.1  | expressed protein;2e-69;259                                                                                |
| Traes_5BS_95A52A87F.2  | MYB family transcription factor, putative, expressed;2e-93;340                                             |
| Traes_5BS_9A5DEAB72.1  | galactosyltransferase family protein, putative, expressed;0.0;919                                          |
| Traes_5BS_AE808B2D5.1  | DNA binding protein, putative, expressed;8e-132;468                                                        |
| Traes_5BS_D58B83EFC.1  | carbohydrate binding protein, putative, expressed;0.0;980                                                  |
| Traes_5BS_E2116F66A.1  | OsFBDUF17 - F-box and DUF domain containing protein, expressed;2e-124;398                                  |
| Traes_5BS_EA45D02B6.1  | cytochrome b6, putative, expressed;4e-26;115                                                               |
| Traes_5BS_EA45D02B61.1 | cytochrome b6, putative, expressed;4e-26;115                                                               |
| Traes_5BS_EA45D02B62.1 | cytochrome b6, putative, expressed;4e-26;115                                                               |
| Traes_5DL_02477C27A.1  | mTERF family protein, expressed;1e-94;344                                                                  |
| Traes_5DL_029F13A75.1  | n/a                                                                                                        |
| Traes_5DL_1950C1FC2.2  | transcription factor, putative, expressed;2e-173;606                                                       |
| Traes_5DL_23CBF391D.2  | CAAX amino terminal protease family protein, putative, expressed;4e-122;438                                |
| Traes_5DL_25F045F32.1  | IscA-like iron-sulfur assembly protein, mitochondrial precursor, putative, expressed;4e-49;191             |
| Traes_5DL_294CF0C3A.1  | retrotransposon protein, putative, unclassified, expressed;9e-17;84.0                                      |
| Traes_5DL_488FBAEEC.2  | LTPL14 - Protease inhibitor/seed storage/LTP family protein precursor, expressed;2e-30;129                 |
| Traes_5DL_4A82A1EB5.1  | leaf senescence related protein, putative, expressed;4e-161;565                                            |
| Traes_5DL_5B7A127BA.1  | Cupin domain containing protein, expressed;6e-72;268                                                       |
| Traes_5DL_5F97D4DAB.1  | n/a                                                                                                        |
| Traes_5DL_6669993AB.1  | oxidoreductase, short chain dehydrogenase/reductase family domain containing protein, expressed;3e-125;446 |
| Traes_5DL_7156326D7.1  | NAD dependent epimerase/dehydratase family protein, putative, expressed;0.0;729                            |
| Traes_5DL_795A597CD.1  | cytochrome b6, putative, expressed;4e-31;133                                                               |
| Traes_5DL_85A7A16F4.1  | OsFBDUF47 - F-box and DUF domain containing protein, expressed;0.0;795                                     |
| Traes_5DL_85C6DAE2F.2  | expressed protein;2e-60;230                                                                                |
| Traes_5DL_91EFA6E79.1  | D-mannose binding lectin family protein, expressed;0.0;1033                                                |
| Traes_5DL_9819A5F4A.1  | expressed protein;7e-28;119                                                                                |
| Traes_5DL_A6EC2A121.1  | amino acid permease family protein, putative, expressed;1e-160;564                                         |
| Traes_5DL_A95A73FFE.2  | transcription initiation factor IIB, putative, expressed;6e-157;551                                        |
| Traes_5DL_BC501B3FC.1  | peptidyl-prolyl cis-trans isomerase, putative, expressed;7e-104;374                                        |
| Traes_5DL_BE544F15F.1  | expressed protein;6e-61;231                                                                                |
| Traes_5DL_D897DFC04.1  | cytochrome P450, putative, expressed;2e-57;221                                                             |
| Traes_5DL_DC720C4C0.2  | expressed protein;7e-66;247                                                                                |
| Traes_5DL_E86CFDE67.1  | Ser/Thr protein phosphatase family protein, putative, expressed;0.0;703                                    |
| Traes_5DL_E98838ED9.1  | response regulator receiver domain containing protein, expressed;1e-25;112                                 |
| Traes_5DL_FOD3764AE.1  | expressed protein;5e-23;104                                                                                |
| Traes_5DL_F2A8D27D3.1  | GDP-mannose transporter, putative, expressed;2e-178;623                                                    |

|                        |                                                                                           |
|------------------------|-------------------------------------------------------------------------------------------|
| Traes_5DS_1DD7E13CF.2  | cytochrome P450, putative, expressed;2e-29;125                                            |
| Traes_5DS_286CDF1FE1.2 | Glutaredoxin, thioredoxin-like superfamily                                                |
| Traes_5DS_6CBA32EA1.1  | WD-40 repeat family protein, putative, expressed;9e-166;581                               |
| Traes_5DS_8D8699156.2  | reticulon domain containing protein, putative, expressed;3e-101;366                       |
| Traes_5DS_A4147A90B.1  | galactosyltransferase family protein, putative, expressed;0.0;801                         |
| Traes_5DS_AEC533CD9.1  | chalcone and stilbene synthases, putative, expressed;0.0;640                              |
| Traes_5DS_B0BE4E0F9.2  | cytochrome P450, putative, expressed;0.0;655                                              |
| Traes_5DS_FC6EAC840.1  | cytochrome b6, putative, expressed;2e-28;122                                              |
| Traes_5DS_FD0D30583.1  | invertase/pectin methylesterase inhibitor family protein, putative, expressed;8e-43;171   |
| Traes_6AL_34FD736F3.1  | transporter, major facilitator family, putative, expressed;0.0;939                        |
| Traes_6AL_391580249.1  | AT hook motif family protein, expressed;5e-174;609                                        |
| Traes_6AL_451D27E5E.1  | fasciclin-like arabinogalactan precursor protein, putative, expressed;5e-24;107           |
| Traes_6AL_51C78D35E.2  | expressed protein;3e-50;194                                                               |
| Traes_6AL_5E2427983.1  | ABC transporter, ATP-binding protein, putative, expressed;0.0;1098                        |
| Traes_6AL_6C8740229.1  | dynammin, putative, expressed;0.0;1041                                                    |
| Traes_6AL_8262324DA.1  | OsSCP10 - Putative Serine Carboxypeptidase homologue, expressed;1e-160;563                |
| Traes_6AL_8BF77066D.3  | resistance protein LR10, putative, expressed;0.0;824                                      |
| Traes_6AL_A923A5347.1  | oligopeptidase, putative, expressed;0.0;1222                                              |
| Traes_6AL_ADC78CBC4.1  | pentatricopeptide, putative, expressed;7e-89;325                                          |
| Traes_6AL_EA45D02B6.1  | cytochrome b6, putative, expressed;4e-26;115                                              |
| Traes_6AL_F099F366F.1  | phosphoribosyl transferase, putative, expressed;1e-167;587                                |
| Traes_6AL_F46F74A23.1  | galactosyltransferase family protein, putative, expressed;0.0;893                         |
| Traes_6AS_07A9CA267.2  | plant neutral invertase domain containing protein, expressed;0.0;921                      |
| Traes_6AS_11466A986.2  | pollen signalling protein with adenyllyl cyclase activity, putative, expressed;0.0;940    |
| Traes_6AS_14F4067BA.1  | cytochrome b6, putative, expressed;4e-31;133                                              |
| Traes_6AS_21AF25515.2  | ATA15 protein, putative, expressed;3e-93;339                                              |
| Traes_6AS_24C6E88D9.1  | retrotransposon protein, putative, unclassified, expressed;5e-44;174                      |
| Traes_6AS_4D5775944.1  | helix-loop-helix DNA-binding domain containing protein, expressed;4e-94;343               |
| Traes_6AS_66DA47CC7.1  | alpha-1,4-glucan-protein synthase, putative, expressed;2e-60;105                          |
| Traes_6AS_712D46544.1  | SNF2 family N-terminal domain containing protein, expressed;0.0;1436                      |
| Traes_6AS_760F5B9E1.1  | alpha-1,4-glucan-protein synthase, putative, expressed;2e-58;105                          |
| Traes_6AS_799DE5651.1  | alpha-1,4-glucan-protein synthase, putative, expressed;6e-41;98.2                         |
| Traes_6AS_799DE56511.1 | alpha-1,4-glucan-protein synthase, putative, expressed;1e-41;98.2                         |
| Traes_6AS_799DE56512.1 | alpha-1,4-glucan-protein synthase, putative, expressed;1e-41;98.2                         |
| Traes_6AS_8AE59E7D9.1  | OsSub10 - Putative Subtilisin homologue, expressed;0.0;884                                |
| Traes_6AS_9596E4B58.1  | E2F family transcription factor protein, putative, expressed;3e-180;629                   |
| Traes_6AS_A4768153B.1  | glycosyl hydrolases family 17, putative, expressed;2e-162;570                             |
| Traes_6AS_D4A88E320.1  | expressed protein;2e-05;45.1                                                              |
| Traes_6AS_DDB21F262.1  | pollen signalling protein with adenyllyl cyclase activity, putative, expressed;2e-152;537 |
| Traes_6BL_14F4067BA.1  | cytochrome b6, putative, expressed;4e-31;133                                              |
| Traes_6BL_55882F049.3  | cyclin G-associated kinase, putative, expressed;0.0;1103                                  |
| Traes_6BL_5837C5783.2  | ATA15 protein, putative, expressed;1e-93;340                                              |
| Traes_6BL_65BEAB58C.2  | aldehyde dehydrogenase, putative, expressed;0.0;777                                       |
| Traes_6BL_BE1824E98.2  | cadmium tolerance factor, putative, expressed;2e-143;464                                  |
| Traes_6BL_C1AC5C2F6.1  | OsWAK22 - OsWAK receptor-like protein kinase, expressed;8e-29;122                         |
| Traes_6BL_E2F8DAB34.2  | ceramide kinase-related, putative, expressed;5e-162;569                                   |
| Traes_6BL_E486D0E41.2  | glucose-6-phosphate 1-dehydrogenase, cytoplasmic isoform, putative, expressed;0.0;778     |
| Traes_6BL_E5D5A61DA.1  | vignain precursor, putative, expressed;2e-162;569                                         |
| Traes_6BL_FAD2FD89C.1  | transporter, major facilitator family, putative, expressed;0.0;848                        |
| Traes_6BL_FE09F7466.1  | selenium-binding protein-like, putative, expressed;7e-89;325                              |
| Traes_6BS_1660E311F.1  | potassium transporter, putative, expressed;9e-23;102                                      |
| Traes_6BS_21574D556.1  | cytochrome b6, putative, expressed;6e-31;133                                              |
| Traes_6BS_302BCA824.1  | CGMC_MAPKCMGC_2.7 - CGMC includes CDA, MAPK, GSK3, and CLKC kinases, expressed;1e-95;347  |
| Traes_6BS_5671DF531.1  | wall-associated receptor kinase 3 precursor, putative, expressed;3e-111;399               |
| Traes_6BS_73AF866E3.2  | ubiquitin-conjugating enzyme, putative, expressed;2e-95;345                               |
| Traes_6BS_A1BCAA7ED.1  | blight resistance protein T118, putative, expressed;0.0;672                               |
| Traes_6BS_A51045ADB.1  | transporter, major facilitator family, putative, expressed;0.0;645                        |
| Traes_6BS_B844D6558.2  | SNF2 family N-terminal domain containing protein, expressed;0.0;1306                      |
| Traes_6BS_BD894AD26.1  | auxin response factor 6, putative, expressed;0.0;1447                                     |
| Traes_6DL_057BC5C9A.1  | serine/threonine-protein kinase receptor precursor, putative, expressed;4e-45;177         |
| Traes_6DL_10926529D.1  | dynammin, putative, expressed;0.0;1099                                                    |
| Traes_6DL_12CD9ACC0.1  | glutamate receptor, putative, expressed;3e-84;309                                         |
| Traes_6DL_14F4067BA.1  | cytochrome b6, putative, expressed;4e-31;133                                              |
| Traes_6DL_1B30D0116.1  | fasciclin-like arabinogalactan precursor protein, putative, expressed;8e-61;231           |



|                        |                                                                                                                      |
|------------------------|----------------------------------------------------------------------------------------------------------------------|
| Traes_6DL_1B77BC5531.2 | n/a                                                                                                                  |
| Traes_6DL_1D288651B.1  | pentatricopeptide, putative, expressed;4e-109;393                                                                    |
| Traes_6DL_2A69F7528.1  | retrotransposon protein, putative, unclassified, expressed;1e-21;99.4                                                |
| Traes_6DL_315652308.2  | ceramide kinase-related, putative, expressed;8e-142;502                                                              |
| Traes_6DL_3C5DF323B.2  | vignain precursor, putative, expressed;2e-152;536                                                                    |
| Traes_6DL_3ED45AC7F.1  | phosphoribosyl transferase, putative, expressed;4e-149;525                                                           |
| Traes_6DL_5E7B1EA4D.1  | expressed protein;1e-29;127                                                                                          |
| Traes_6DL_6EC763C47.1  | peptide transporter PTR2, putative, expressed;3e-174;609                                                             |
| Traes_6DL_8B7AE5FF2.1  | pectinesterase, putative, expressed;7e-157;551                                                                       |
| Traes_6DL_92B3B176F.2  | AT hook motif family protein, expressed;2e-176;617                                                                   |
| Traes_6DL_C44F19089.1  | transporter, major facilitator family, putative, expressed;0.0;901                                                   |
| Traes_6DL_E31AB6EED.1  | alpha-amylase precursor, putative, expressed;0.0;704                                                                 |
| Traes_6DL_FECA3FE13.1  | AP2 domain containing protein, expressed;6e-98;355                                                                   |
| Traes_6DS_03B231497.1  | ubiquitin-conjugating enzyme, putative, expressed;2e-95;345                                                          |
| Traes_6DS_053061050.1  | helix-loop-helix DNA-binding domain containing protein, expressed;6e-46;182                                          |
| Traes_6DS_0AC635A1C.1  | transporter, major facilitator family, putative, expressed;0.0;635                                                   |
| Traes_6DS_0AC635A1C1.1 | transporter, major facilitator family, putative, expressed;0.0;635                                                   |
| Traes_6DS_185723D1E.1  | STE_PAK_Ste20_STLK.1 - STE kinases include homologs to sterile 7, sterile 11 and sterile 20 from yeast, expressed;2e |
| Traes_6DS_5EE58C9B3.1  | GDSL-like lipase/acylhydrolase, putative, expressed;2e-140;496                                                       |
| Traes_6DS_6E31981FF.1  | phytosulfokine receptor precursor, putative, expressed;2e-97;353                                                     |
| Traes_6DS_794C3DF2C.1  | transporter, major facilitator family, putative, expressed;0.0;730                                                   |
| Traes_6DS_8D82C81DB.1  | cytochrome b6, putative, expressed;4e-31;133                                                                         |
| Traes_6DS_AA7F69F37.1  | SNF2 family N-terminal domain containing protein, expressed;0.0;1433                                                 |
| Traes_6DS_F56597DB3.2  | DUF581 domain containing protein, expressed;3e-49;192                                                                |
| Traes_7AL_094506A5A.1  | zinc finger CCHC domain-containing protein 10, putative, expressed;1e-53;207                                         |
| Traes_7AL_18EE69735.1  | serine/threonine-protein kinase receptor precursor, putative, expressed;0.0;780                                      |
| Traes_7AL_4BC00ED54.1  | serine/threonine-protein kinase receptor precursor, putative, expressed;0.0;631                                      |
| Traes_7AL_61C51C0CD.1  | expressed protein;6e-71;265                                                                                          |
| Traes_7AL_7A2639A1B.2  | copper-transporting ATPase, putative, expressed;0.0;1533                                                             |
| Traes_7AL_7E37FB227.1  | cytochrome b6, putative, expressed;2e-31;133                                                                         |
| Traes_7AL_C64F17133.2  | OsWAK108 - OsWAK receptor-like protein kinase, expressed;0.0;664                                                     |
| Traes_7AL_CCBA8A129.1  | phospholipase C, putative, expressed;5e-132;468                                                                      |
| Traes_7AL_E3ADC8C38.1  | auxin response factor 18, putative, expressed;1e-106;335                                                             |
| Traes_7AL_F05316203.2  | vacuolar-sorting receptor precursor, putative, expressed;9e-48;186                                                   |
| Traes_7AL_F445E67BB.3  | phosphatidylinositol-4-phosphate 5-Kinase, putative, expressed;0.0;2104                                              |
| Traes_7AL_F8EB563ED.1  | cytochrome P450, putative, expressed;0.0;647                                                                         |
| Traes_7AS_0D3979FCB.1  | DNA-repair protein complementing XP-C cells, putative, expressed;2e-84;308                                           |
| Traes_7AS_10A9A261D.1  | OsWAK11 - OsWAK receptor-like protein kinase, expressed;4e-14;73.9                                                   |
| Traes_7AS_13B014806.2  | expressed protein;3e-23;108                                                                                          |
| Traes_7AS_1D7969D3E.1  | 60S ribosomal protein L39, putative, expressed;5e-14;73.9                                                            |
| Traes_7AS_24DCC6FA4.1  | pentatricopeptide, putative, expressed;0.0;649                                                                       |
| Traes_7AS_342973D401.5 | phosphatidylinositol 3- and 4-kinase family protein, putative, expressed;0.0;804                                     |
| Traes_7AS_3C1208141.1  | bola, putative, expressed;6e-33;136                                                                                  |
| Traes_7AS_7F104C1B7.1  | transposon protein, putative, unclassified, expressed;2e-81;300                                                      |
| Traes_7AS_9C66A3714.1  | coiled-coil domain containing 49, putative, expressed;7e-54;209                                                      |
| Traes_7AS_BC38CEEE2.1  | citrate-binding protein precursor, putative, expressed;9e-92;333                                                     |
| Traes_7AS_BC38CEEE21.1 | citrate-binding protein precursor, putative, expressed;9e-92;333                                                     |
| Traes_7AS_E28C6595A.2  | DNA repair ATPase-related, putative, expressed;8e-171;597                                                            |
| Traes_7AS_F9C6EBD97.2  | uvrB/uvrC motif family protein, expressed;8e-156;549                                                                 |
| Traes_7BL_03FF808BF.1  | transposable element protein, putative, containing Pfam profile: PF03004, Transposase_24, expressed;2e-111;400       |
| Traes_7BL_0D3B2A96A.1  | receptor-like kinase, putative, expressed;2e-46;181                                                                  |
| Traes_7BL_OFABEE965.2  | phosphatidylinositol-4-phosphate 5-Kinase, putative, expressed;0.0;832                                               |
| Traes_7BL_18D335F08.2  | auxin response factor 18, putative, expressed;2e-49;191                                                              |
| Traes_7BL_25381F605.1  | expressed protein;7e-147;518                                                                                         |
| Traes_7BL_2C564E996.2  | phospholipase C, putative, expressed;7e-133;471                                                                      |
| Traes_7BL_34ECCF38F.1  | cytochrome P450, putative, expressed;2e-68;256                                                                       |
| Traes_7BL_5EB114AB7.1  | cytochrome P450, putative, expressed;7e-73;270                                                                       |
| Traes_7BL_69A11C4AF.1  | WD repeat-containing protein, putative, expressed;0.0;1455                                                           |
| Traes_7BL_998EC9F74.2  | MYB family transcription factor, putative, expressed;0.0;895                                                         |
| Traes_7BL_C5D2C17B3.1  | transferase family protein, putative, expressed;4e-12;67.4                                                           |
| Traes_7BL_D6BB0C6DF.1  | cytochrome b6, putative, expressed;7e-32;135                                                                         |
| Traes_7BL_F9ECF4528.2  | serine/threonine-protein kinase receptor precursor, putative, expressed;0.0;780                                      |
| Traes_7BS_51B7DECOE.1  | expressed protein;1e-70;264                                                                                          |
| Traes_7BS_65EBEDEF.1   | expressed protein;1e-31;133                                                                                          |

|                        |                                                                                     |
|------------------------|-------------------------------------------------------------------------------------|
| Traes_7BS_93A86D7A11.1 | phosphatidylinositol 3- and 4-kinase family protein, putative, expressed;0.0;1007   |
| Traes_7BS_955956707.1  | SET domain containing protein, expressed;0.0;1177                                   |
| Traes_7BS_9C61A9363.1  | cytochrome b6, putative, expressed;2e-30;131                                        |
| Traes_7BS_BFDFF014C.1  | coiled-coil domain containing 49, putative, expressed;5e-56;216                     |
| Traes_7BS_C2D1B9700.2  | uvrB/uvrC motif family protein, expressed;1e-128;457                                |
| Traes_7BS_CB15DB953.1  | HECT-domain domain containing protein, expressed;2e-23;106                          |
| Traes_7DL_0C02D38AD.1  | dehydrogenase, putative, expressed;2e-161;566                                       |
| Traes_7DL_310E46F15.3  | MYB family transcription factor, putative, expressed;0.0;916                        |
| Traes_7DL_3C03C77D4.1  | expressed protein;0.0;797                                                           |
| Traes_7DL_55ADB3528.1  | auxin response factor 18, putative, expressed;0.0;748                               |
| Traes_7DL_58184284F.2  | pollen signalling protein with adenyl cyclase activity, putative, expressed;0.0;977 |
| Traes_7DL_66682FE93.1  | zinc finger CCHC domain-containing protein 10, putative, expressed;1e-53;207        |
| Traes_7DL_807EB60BD.1  | phospholipase C, putative, expressed;6e-133;471                                     |
| Traes_7DL_8DFE5AF5E.2  | chromo domain-containing protein LHP1, putative, expressed;2e-75;281                |
| Traes_7DL_96775548A.1  | cytochrome b6, putative, expressed;4e-25;112                                        |
| Traes_7DL_C203DF866.1  | zinc finger protein, putative, expressed;2e-17;85.5                                 |
| Traes_7DL_C5D3B7775.1  | receptor-like kinase, putative, expressed;1e-95;347                                 |
| Traes_7DL_FDD56DA11.2  | phosphatidylinositol-4-phosphate 5-Kinase, putative, expressed;0.0;2087             |
| Traes_7DS_0D1C03C27.1  | SET domain containing protein, expressed;0.0;1186                                   |
| Traes_7DS_219826521.2  | uvrB/uvrC motif family protein, expressed;0.0;635                                   |
| Traes_7DS_32EFB7CD0.2  | pentatricopeptide, putative, expressed;0.0;694                                      |
| Traes_7DS_3C83C8EF9.2  | DNA repair ATPase-related, putative, expressed;4e-170;595                           |
| Traes_7DS_3D49B9F9B.2  | 60S ribosomal protein L39, putative, expressed;1e-24;109                            |
| Traes_7DS_4E9E23050.1  | expressed protein;2e-53;206                                                         |
| Traes_7DS_53C6E8C4E.1  | cytochrome b6, putative, expressed;8e-26;114                                        |
| Traes_7DS_5DBF1BD6C.7  | phosphatidylinositol 3- and 4-kinase family protein, putative, expressed;0.0;998    |
| Traes_7DS_60A8AFEEF.1  | OsWAK11 - OsWAK receptor-like protein kinase, expressed;3e-14;74.3                  |
| Traes_7DS_6B52B942F.2  | DNA-repair protein complementing XP-C cells, putative, expressed;0.0;1021           |
| Traes_7DS_6F5B0EBD8.1  | expressed protein;2e-25;113                                                         |
| Traes_7DS_771C3A317.1  | bolA, putative, expressed;7e-39;158                                                 |
| Traes_7DS_8B2BA1741.2  | aldehyde dehydrogenase, putative, expressed;0.0;755                                 |
| Traes_7DS_985883968.2  | no apical meristem protein, putative, expressed;1e-76;285                           |
| Traes_7DS_98EE649A5.1  | expressed protein;1e-31;132                                                         |
| Traes_7DS_AF579B6E8.2  | ZOS8-11 - C2H2 zinc finger protein, expressed;0.0;677                               |
| Traes_7DS_EDF4F3552.1  | citrate-binding protein precursor, putative, expressed;5e-75;278                    |
| Traes_7DS_F219C7147.2  | peptidase, putative, expressed;0.0;464                                              |

**Table S8.** *Zymoseptoria tritici* (Zt) genes selected for gene silencing using BSMV-HIGS.

| Target                           | Function                       | Expected phenotype                            | HIGS construct size* (in bp) | si-Fi software predictions (all siRNA hits vs effective siRNA hits) | si-Fi predicted off-target siRNA hits**                                        |
|----------------------------------|--------------------------------|-----------------------------------------------|------------------------------|---------------------------------------------------------------------|--------------------------------------------------------------------------------|
| <i>ZtCYP51</i><br>(construct M5) | Ergosterol biosynthesis        | Lethal; fungicide target                      | 343 bp                       | 234 / 89                                                            | Zt: no<br>Wheat: no                                                            |
| <i>ZtTUBa</i><br>(construct M4)  | Microtubules                   | Lethal or reduced virulence                   | 281 bp                       | 193 / 68                                                            | Zt: YES, to putative uncharacterised protein (siRNA hits - 61/22)<br>Wheat: no |
| <i>ZtTUBb</i><br>(construct M1)  | Microtubules                   | Lethal or reduced virulence; fungicide target | 303 bp                       | 193 / 90                                                            | Zt: no<br>Wheat: no                                                            |
| <i>ZtALG2</i><br>(construct M7)  | Alpha-1,2-mannosyl-transferase | Loss of pathogenicity towards wheat           | 315 bp                       | 209 / 86                                                            | Zt: no<br>Wheat: no                                                            |

\*size of protein coding sequences inserted into the BSMV vector (not including the LIC adaptor sequences)

\*\*Tested for cross-hits against *Z. tritici* and wheat transcripts databases

### Methods S1: Small RNA locus likelihood estimation.

Small RNA (sRNA) locus likelihood estimation is to provide a posterior probability value indicating the probability of a given locus to be a true small RNA locus. The posterior probability is based on the sRNA sequencing reads coverage depth and read length distribution information for a given locus. A true sRNA locus is assumed to have higher coverage than a null locus does, which may have some short RNA sequences aligned that originate for example from degradation of mRNA. In addition, sRNA locus usually has a dominant length reads, e.g. 21 nt or 24 nt reads are highly dominated in a sRNA locus compared to other lengths reads. On the other hand, a locus with random, degraded mRNA products usually displays a more uniform distribution of all types short length reads. The following method to estimate sRNA locus probability is based on the above two assumptions.

#### Bayesian model for sRNA locus prediction

Let  $I_l \sim B(1, p)$ ,  $l=1, \dots, L$ , be the Bernoulli random variable indicating whether a locus  $l$  is a sRNA locus,  $Prob(I_l=1)=p$ , where:

$$I_l = \begin{cases} 0 & \text{if } I_l = 0 \\ 1 & \text{if } I_l = 1 \end{cases} \quad (1)$$

Then the posterior probability for a sRNA locus is:

$$Pr(I_l = 1 | data) = \frac{p Pr(data | I_l = 1)}{p Pr(data | I_l = 1) + (1 - p) Pr(data | I_l = 0)} \quad (2)$$

The  $Prob(data | I_l = 1)$  is based on both read coverage depth and read length distribution, therefore for locus  $l$ :

$$Pr(data | I_l = 1) = Pr(readcount_l | I_l = 1) Pr(length - distribution_l | I_l = 1) \quad (3)$$

And  $Prob(data | I_l = 0)$  for null locus  $l$ :

$$Pr(data | I_l = 0) = Pr(readcount_l | I_l = 0) Pr(length - distribution_l | I_l = 0) \quad (4)$$

#### Negative binomial model for read count data

Negative binomial distribution is applied to model read count data.  $u_s$  and  $\varphi_s$  denotes the mean count and dispersion for sRNA loci, respectively;  $u_n$  and  $\varphi_n$  denotes the mean count and dispersion for null loci, respectively. Therefore, for specific locus  $l$ , we have:

$$\begin{aligned} y_l | (u_s, \varphi_s, I_l = 1) &\sim NB(u_s, \varphi_s) \\ y_l | (u_n, \varphi_n, I_l = 0) &\sim NB(u_n, \varphi_n) \end{aligned} \quad (5)$$

where  $y_j$  is a read count for a given locus  $j$ .

Finally, based on the negative binomial probability mass function, we have:

$$Pr(readcount_l | I_l = 0) = P(Y = y_j | \mu_n, \varphi_n) = \frac{\Gamma(y + \varphi_n^{-1})}{\Gamma(\varphi_n^{-1})\Gamma(y + 1)} \left( \frac{1}{1 + \mu_n \varphi_n} \right)^{\varphi_n^{-1}} \left( \frac{\mu_n}{\varphi_n^{-1} + \mu_n} \right)^y$$
